# Supplementary material
Source: PubMed Central journal article supplement (PMC3857712)

## General

$^1\text{H}$  NMR and  $^{13}\text{C}$  NMR spectra were taken on a Bruker Avance 300 spectrometer at 300 MHz and 75 MHz respectively, a Bruker Avance 400 spectrometer at 400 MHz and 100 MHz, or a Bruker Avance 500 spectrometer at 500 MHz and 125 MHz, as specified. The chemical shifts are reported in parts per million (ppm) on the delta ( $\delta$ ) scale. The solvent peak was used as a reference value, for  $^1\text{H}$  NMR:  $\text{CDCl}_3 = 7.27$  ppm,  $\text{CD}_2\text{Cl}_2 = 5.31$  ppm,  $\text{C}_6\text{D}_6 = 7.16$  ppm, for  $^{13}\text{C}$  NMR:  $\text{CDCl}_3 = 77.23$ ,  $\text{CDCl}_3 = 53.52$ ,  $\text{C}_6\text{D}_6 = 128.37$ . Data are reported as follows: m = multiplet, s = singlet; d = doublet; t = triplet; q = quartet; p = pentet; dd = doublet of doublets; dt = doublet of triplets; br = broad. High resolution and low resolution mass spectra were collected on a VG 7070 spectrometer. Infrared (IR) spectra were taken on a Mattson Cygnus 100 spectrometer. Samples for IR were prepared as thin films on a NaCl plates by dissolving the corresponding compounds in  $\text{CH}_2\text{Cl}_2$  followed by evaporation of the  $\text{CH}_2\text{Cl}_2$ . Methylene chloride was distilled under  $\text{N}_2$  from  $\text{CaH}_2$ . Analytical TLC was performed on E. Merck pre-coated (25 mm) silica gel 60F-254 plates. Visualization was done under UV (254 nm). Flash chromatography was done using ICN SiliTech 32-63 60 Å silica gel. Reagent grade ethyl acetate, diethyl ether, pentane and hexanes (commercial mixture) were purchased from EM Science and used as is for chromatography. All reactions were performed in oven or flame-dried glassware under a positive pressure of  $\text{N}_2$  with magnetic stirring unless otherwise noted.

### General procedure for rearrangement cyclization catalyzed by $\text{Re}_2\text{O}_7$

To a solution (~10 mM) of corresponding substrate in  $\text{CH}_2\text{Cl}_2$  was added 0.05 equivalent of  $\text{Re}_2\text{O}_7$ , the reaction mixture was stirred at RT (unless otherwise mentioned in the substrate tables) and monitored by TLC until complete consumption of the starting chemicals, then the reaction was quenched with a few drops of pyridine or triethylamine and the solvent was removed under vacuum, followed by purification by flash chromatography or preparation TLC to give the product.

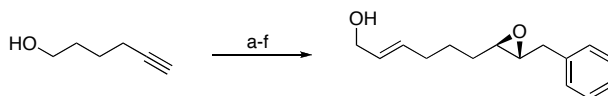

#### Reagents and conditions

- a) DIBAL-H, hexanes,  $-78^\circ\text{C}$ , then  $\text{I}_2$ , THF, 51%. b)  $\text{BnMgCl}$ ,  $(\text{dppf})_2\text{PdCl}_2$ , THF, 95%.  
c) PCC, Celite,  $\text{CH}_2\text{Cl}_2$ . d)  $(\text{EtO})_2\text{P}(\text{O})\text{CH}_2\text{CO}_2\text{Et}$ , NaH, THF,  $0^\circ\text{C}$ , 77% (two steps).  
e) D-Fructose-derived Shi ketone, Oxone,  $\text{Na}_2\text{B}_4\text{O}_7$ ,  $\text{Na}_2(\text{EDTA})$ ,  $\text{K}_2\text{CO}_3$ ,  $\text{Bu}_4\text{NHSO}_4$ ,  $\text{CH}_3\text{CN}$ ,  $\text{H}_2\text{O}$ ,  $0^\circ\text{C}$ , 39%. f) DIBAL-H,  $\text{CH}_2\text{Cl}_2$ ,  $-78^\circ\text{C}$ , 91%.

### Scheme 1. Synthesis of 1.

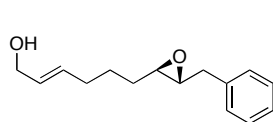

#### (*E*)-6-((2*R*,3*R*)-3-benzyloxiran-2-yl)hex-2-en-1-ol (1)

$^1\text{H}$  NMR (400 MHz,  $\text{CDCl}_3$ )  $\delta$  7.31-7.38 (m, 2H), 7.23-7.30 (m, 3H), 5.57-5.72 (m, 2H), 4.08 (d,  $J = 5.2$ , 2H), 2.90-2.98 (m, 2H), 2.77-2.86 (m, 2H), 2.03-2.13 (m, 2H), 1.83 (br, 1H), 1.45-1.65 (m, 4H);  $^{13}\text{C}$  NMR (100 MHz,  $\text{CDCl}_3$ ) 137.4, 132.3, 129.6, 128.9, 128.6, 126.6, 63.5, 58.8, 58.6, 38.5, 31.8, 31.3; IR (neat) 3407, 3027, 2973, 2929, 2857, 1669, 1604, 1494, 1370, 1088, 1001, 971, 932, 743  $\text{cm}^{-1}$ ; HRMS (ESI) calcd for  $\text{C}_{15}\text{H}_{20}\text{O}_2\text{Na}$   $[\text{M} + \text{Na}]^+$  255.1361, found 255.1387.

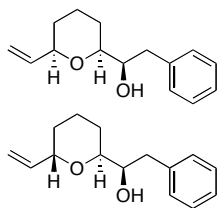

#### (*R*)-2-Phenyl-1-((2*S*,6*R*)-6-vinyltetrahydro-2H-pyran-2-yl)ethanol (2) and (*R*)-2-Phenyl-1-((2*S*,6*S*)-6-vinyltetrahydro-2H-pyran-2-yl)ethanol (3)

The general rearrangement procedure was followed with **1** (28 mg, 0.12 mmol),  $\text{Re}_2\text{O}_7$  (3 mg, 0.006 mmol), and  $\text{CH}_2\text{Cl}_2$  (12 mL). The reaction was stirred at rt for 4 h, then was quenched with five drops of pyridine. After evaporation of the solvent, the crude mixture was purified by flash chromatography (10%-20% ethyl acetate in hexanes) to give the product (25 mg, 89%, dr = 1.3:1). The mixture was further purified for analysis. Major

product (**2**):  $^1\text{H}$  NMR (400 MHz,  $\text{CDCl}_3$ )  $\delta$  7.29-7.35 (m, 2H), 7.21-7.28 (m, 3H), 5.89 (ddd,  $J = 5.2, 10.8, 17.2$ , 1H), 5.26 (dt,  $J = 1.6, 17.2$ , 1H), 5.12 (dt,  $J = 1.6, 10.8$ , 1H), 3.94 (h,  $J = 4.0$ , 1H), 3.88 (dddd,  $J = 1.2, 1.6, 2.8, 5.2, 10.8$ , 1H), 3.35 (ddd,  $J = 2.0, 4.4, 10.8$ , 1H), 2.89 (dd,  $J = 4.8, 13.6$ , 1H), 2.80 (dd,  $J = 8.4, 13.2$ , 1H), 2.04 (d,  $J = 4.0$ , 1H), 1.92-1.99 (m, 1H), 1.62-1.77 (m, 2H), 1.41-1.62 (m, 2H), 1.28-1.39 (m, 1H);  $^{13}\text{C}$  NMR (100 MHz,  $\text{CDCl}_3$ ) 139.4, 138.5, 129.4, 128.5, 126.3, 114.4, 79.5, 78.4, 74.7, 38.7, 31.6, 25.1, 23.0; IR (neat) 3446, 3027, 2934, 2855, 1646, 1603, 1495, 1453, 1306, 1201, 1077, 1046, 915, 748; HRMS (ESI) calcd for  $\text{C}_{15}\text{H}_{20}\text{O}_2\text{Na}$   $[\text{M} + \text{Na}]^+$  255.1361, found 255.1378. Minor product (**3**):  $^1\text{H}$  NMR (400 MHz,  $\text{CDCl}_3$ )  $\delta$  7.29-7.34 (m, 2H), 7.21-7.28 (m, 3H), 5.92-6.02 (m, 1H), 5.25-5.27 (m, 1H), 5.21-5.24 (m, 1H), 4.45-4.51 (m, 1H), 3.89 (h,  $J = 4.4$ , 1H), 3.63 (ddd,  $J = 2.0, 5.2, 9.2$ , 1H), 2.93 (dd,  $J = 4.0, 14.0$ , 1H), 2.69 (dd,  $J = 8.8, 14.0$ , 1H), 1.91 (d,  $J = 3.6$ , 1H), 1.77-1.88 (m, 1H), 1.63-1.75 (m, 4H), 1.52-1.63 (m, 2H);  $^{13}\text{C}$  NMR (100 MHz,  $\text{CDCl}_3$ ) 138.6, 138.1, 129.4, 128.5, 126.4, 116.4, 74.1, 73.3, 73.0, 39.0, 28.6, 25.5, 18.3; IR (neat) 3439, 3027, 2930, 2858, 1669, 1603, 1494, 1453, 1407, 1338, 1203, 1121, 1048, 1039, 921, 891, 748  $\text{cm}^{-1}$ ; HRMS (ESI) calcd for  $\text{C}_{15}\text{H}_{20}\text{O}_2\text{Na}$   $[\text{M} + \text{Na}]^+$  255.1361, found 255.1376.

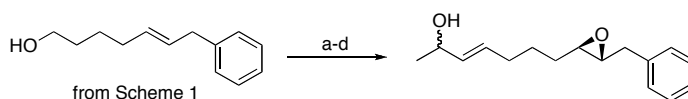

**Reagents and conditions**

a) PCC, Celite,  $\text{CH}_2\text{Cl}_2$ . b)  $(\text{EtO})_2\text{P}(\text{O})\text{CH}_2\text{COMe}$ , NaH, THF, 0  $^\circ\text{C}$ , 66% (two steps). c) D-Fructose-derived Shi ketone, Oxone,  $\text{Na}_2\text{B}_4\text{O}_7$ ,  $\text{Na}_2(\text{EDTA})$ ,  $\text{K}_2\text{CO}_3$ ,  $\text{Bu}_4\text{NHSO}_4$ ,  $\text{CH}_3\text{CN}$ ,  $\text{H}_2\text{O}$ , 0  $^\circ\text{C}$ , 58%. d) DIBAL-H,  $\text{CH}_2\text{Cl}_2$ , -78  $^\circ\text{C}$ , 91%.

**Scheme 2. Synthesis of 4.**

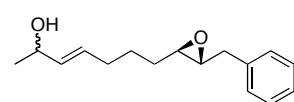

**(E)-7-((2R, 3R)-3-Benzylloxiran-2-yl)hept-3-en-2-ol (4)**

$^1\text{H}$  NMR (300 MHz,  $\text{CDCl}_3$ )  $\delta$  7.30-7.38 (m, 2H), 7.23-7.30 (m, 3H), 5.46-5.66 (m, 2H), 4.26 (p,  $J = 6.3$ , 1H), 2.90-2.98 (m, 2H), 2.77-2.85 (m, 2H), 2.05 (q,  $J = 6.6$ , 2H), 1.78 (br, 1H), 1.46-1.62 (m, 4H), 1.26 (d,  $J = 6.3$ , 3H);  $^{13}\text{C}$  NMR (75 MHz,  $\text{CDCl}_3$ )  $\delta$  137.4, 134.8, 130.0, 128.9, 128.5, 126.6, 68.7, 58.8, 58.6, 38.5, 31.7, 31.3, 25.5, 23.5; IR (neat) 3412, 3027, 2971, 2925, 2857, 1604, 1494, 1453, 1367, 1145, 1063, 969, 798, 743  $\text{cm}^{-1}$ ; HRMS (ESI) calcd for  $\text{C}_{16}\text{H}_{22}\text{O}_2\text{Na}$   $[\text{M} + \text{Na}]^+$  269.1517, found 269.1529.

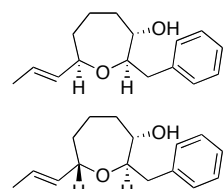

**(2R,3S,7R)-2-Benzyl-7-((E)-prop-1-en-1-yl)oxepan-3-ol (5) and (2R,3S,7S)-2-Benzyl-7-((E)-prop-1-en-1-yl)oxepan-3-ol (6)**

The general rearrangement procedure was followed with **4** (25 mg, 0.10 mmol),  $\text{Re}_2\text{O}_7$  (2 mg, 0.005 mmol), and  $\text{CH}_2\text{Cl}_2$  (10 mL). The reaction was stirred at rt for 45 min, then was quenched with five drops of pyridine. After evaporation of the solvent, the crude mixture was purified by flash chromatography (20%-30% ethyl acetate in hexanes) to give the product (22 mg, 89%, dr = 1:1.2). The isomers were further purified for characterization. Minor product (**5**):  $^1\text{H}$  NMR (400 MHz,  $\text{C}_6\text{D}_6$ )  $\delta$  7.35-7.37 (m, 2H), 7.18-7.22 (m, 2H), 7.08-7.12 (m, 1H), 5.39-5.51 (m, 2H), 3.62-3.67 (m, 1H), 3.42-3.45 (m, 1H), 3.38 (dt,  $J = 3.2, 8.4$ , 1H), 3.04 (dd,  $J = 3.0, 13.8$ , 1H), 2.78 (dd,  $J = 8.6, 13.8$ , 1H), 1.70-1.79 (m, 1H), 1.49-1.58 (m, 2H), 1.53 (d,  $J = 5.2$ , 3H), 1.35-1.48 (m, 3H), 0.78 (br, 1H);  $^{13}\text{C}$  NMR (100 MHz,  $\text{CDCl}_3$ ) 139.5, 132.3, 129.5, 128.1, 126.0, 125.8, 86.2, 82.4, 75.3, 40.7, 36.2, 35.8, 19.4, 17.8; IR (neat) 3415, 3027, 2926, 2857, 1672, 1604, 1495, 1452, 1133, 1101, 1037, 999, 966, 750  $\text{cm}^{-1}$ ; HRMS (EI) calcd for  $\text{C}_{16}\text{H}_{22}\text{O}_2$   $[\text{M}]^+$  246.1620, found 246.1629. Major product (**6**):  $^1\text{H}$  NMR (400 MHz,  $\text{C}_6\text{D}_6$ )  $\delta$  7.29-7.33 (m, 2H), 7.17-7.22 (m, 2H), 7.07-7.12 (m, 1H), 5.24 (ddq,  $J = 1.2, 6.4, 15.6$ , 1H), 4.91 (ddq,  $J = 1.6, 5.6, 15.6$ , 1H), 3.92 (p,  $J = 5.2$ , 1H), 3.46 (dt,  $J = 2.8, 9.2$ , 1H), 3.12 (dt,  $J = 4.4, 9.2$ , 1H), 3.17 (dd,  $J = 2.8, 13.6$ , 1H), 2.64 (dd,  $J = 9.2, 13.6$ , 1H), 1.79-1.87 (m, 1H), 1.48-1.56 (m, 1H), 1.35-1.47 (m, 2H), 1.39 (d,  $J = 6.4$ , 3H), 1.18-1.35 (m, 3H), 0.90 (br, 1H);  $^{13}\text{C}$  NMR (100 MHz,  $\text{CDCl}_3$ ) 139.4, 132.3, 130.0, 128.0, 125.9, 125.7, 78.3, 75.6, 75.3, 39.4, 38.4, 33.9, 21.5, 17.8; IR (neat) 3307, 3034, 2926, 2855, 1605,

1495, 1451, 1354, 1123, 1091, 1036, 970, 744  $\text{cm}^{-1}$ ; HRMS (ESI) calcd for  $\text{C}_{16}\text{H}_{22}\text{O}_2\text{Na}$   $[\text{M} + \text{Na}]^+$  269.1517, found 269.1509.

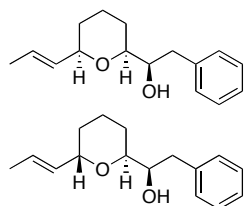

**(*R*)-2-Phenyl-1-((2*S*,6*R*)-6-((*E*)-prop-1-en-1-yl)tetrahydro-2H-pyran-2-yl)ethanol (7) and (*R*)-2-phenyl-1-((2*S*,6*S*)-6-((*E*)-prop-1-en-1-yl)tetrahydro-2H-pyran-2-yl)ethanol (8)**

The general rearrangement procedure was followed with **4** (30 mg, 0.12 mmol),  $\text{Re}_2\text{O}_7$  (3 mg, 0.006 mmol), and  $\text{CH}_2\text{Cl}_2$  (12 mL). The reaction was stirred at rt for 36 h (5% more catalyst added at 12 hr and 24 hr respectively), then was quenched with five drops of pyridine. After evaporation of the solvent, the crude mixture was purified by flash chromatography (10%-20% ethyl acetate in hexanes) to give the product (27 mg, 93%, dr = 1:1.1). These isomers were further purified for characterization. Minor product (**7**):  $^1\text{H}$  NMR (400 MHz,  $\text{CDCl}_3$ )  $\delta$  7.30-7.37 (m, 2H), 7.23-7.30 (m, 3H), 5.72 (ddt,  $J = 0.8, 6.4, 15.6$ , 1H), 5.55 (ddt,  $J = 1.6, 6.0, 15.6$ , 1H), 3.96 (h,  $J = 4.0$ , 1H), 3.84 (dd,  $J = 6.2, 10.2$ , 1H), 3.34 (ddd,  $J = 1.8, 4.2, 10.6$ , 1H), 2.88 (dd,  $J = 5.0, 13.8$ , 1H), 2.81 (dd,  $J = 8.2, 13.8$ ), 2.01-2.04 (m, 1H), 1.92-1.98 (m, 1H), 1.73 (d,  $J = 6.4$ , 3H), 1.72 (br, 1H), 1.58-1.67 (m, 1H), 1.41-1.58 (m, 2H), 1.36 (m, 1H);  $^{13}\text{C}$  NMR (100 MHz,  $\text{CDCl}_3$ ) 138.5, 132.4, 129.4, 128.5, 126.5, 126.3, 79.4, 78.5, 74.6, 38.7, 31.9, 24.9, 23.0, 17.9; IR (neat) 3360, 3029, 2960, 2928, 2912, 2839, 1677, 1495, 1453, 1379, 1293, 1196, 1078, 1037, 748  $\text{cm}^{-1}$ ; HRMS (ESI) calcd for  $\text{C}_{16}\text{H}_{22}\text{O}_2\text{Na}$   $[\text{M} + \text{Na}]^+$  269.1517, found 269.1535. Major product (**8**):  $^1\text{H}$  NMR (400 MHz,  $\text{CDCl}_3$ )  $\delta$  7.31-7.38 (m, 2H), 7.23-7.31 (m, 3H), 5.64-5.75 (m, 2H), 4.40-4.46 (m, 1H), 3.87-3.93 (m, 1H), 3.64 (ddd,  $J = 2.2, 5.2, 9.0$ , 1H), 3.95 (dd,  $J = 3.6, 14.0$ , 1H), 2.72 (dd,  $J = 9.0, 14.0$ , 1H), 1.92 (br, 1H), 1.78-1.86 (m, 1H), 1.76 (d,  $J = 4.8$ , 3H), 1.68-1.74 (m, 3H), 1.56-1.67 (m, 2H);  $^{13}\text{C}$  NMR (100 MHz,  $\text{CDCl}_3$ ) 138.7, 130.6, 129.5, 128.5, 127.9, 126.4, 73.9, 73.2, 72.8, 39.0, 29.2, 25.5, 18.4, 18.0; IR (neat) 3434, 3026, 2934, 2859, 1668, 1603, 1494, 1452, 1202, 1077, 1035, 966, 890, 748  $\text{cm}^{-1}$ ; HRMS (ESI) calcd for  $\text{C}_{16}\text{H}_{22}\text{O}_2\text{Na}$   $[\text{M} + \text{Na}]^+$  269.1517, found 269.1496.

The absolute configurations of the secondary alcohols in structures **5-8** were determined by Mosher ester analysis. Typically, 5-6 mg of each alcohol was divided into two parts, these two parts were treated with *R* and *S* Mosher acid (5 equiv), DCC (5.5 equiv), and DMAP (5.5 equiv) in 1 mL  $\text{CH}_2\text{Cl}_2$ . The reactions were stirred at rt and were monitored by TLC. When the starting alcohol was completely consumed, the reaction mixtures were filtered through a short column of silica gel to remove the insoluble salts. After the removal of the solvents under reduced pressure,  $^1\text{H}$  NMR and  $^{19}\text{F}$  NMR were taken to determine the configuration and enantiopurity of the corresponding alcohols.

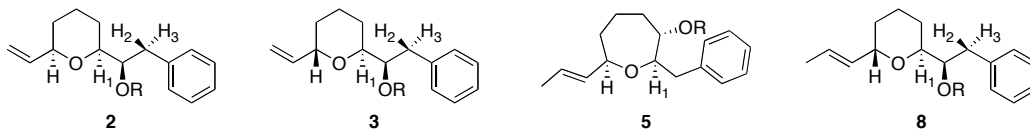

| Structure | <i>R</i> -Mosher ester |             |             | <i>S</i> -Mosher ester |             |             | Solvent                |
|-----------|------------------------|-------------|-------------|------------------------|-------------|-------------|------------------------|
|           | $\delta$ H1            | $\delta$ H2 | $\delta$ H3 | $\delta$ H1            | $\delta$ H2 | $\delta$ H3 |                        |
| <b>2</b>  | 5.79                   | 2.88        | 2.88        | 5.75                   | 2.91        | 3.01        | $\text{CDCl}_3$        |
| <b>3</b>  | 5.83                   | 2.81        | 2.97        | 5.81                   | 2.96        | 3.16        | $\text{CDCl}_3$        |
| <b>5</b>  | 3.51                   |             |             | 3.65                   |             |             | $\text{C}_6\text{D}_6$ |
| <b>8</b>  | 3.83                   | 2.88        | 3.04        | 3.78                   | 2.94        | 3.14        | $\text{CDCl}_3$        |

Structures **5** and **7**, **6** and **8** were difficult to differentiate by  $^1\text{H}$  NMR,  $^{13}\text{C}$  NMR, COSY and NOESY experiments, but could be differentiated oxidizing to the corresponding ketones. The ketone products were obtained by submitting the corresponding alcohols to the PCC oxidation conditions: typically, 2-7 mg of alcohol was treated with 5-10 eq PCC and Celite in  $\text{CH}_2\text{Cl}_2$  until complete consumption of the alcohol, then

the reaction mixture was filtered through a short column of silica gel to give the pure ketones. (yield: 92%-97%) The structures **6** and **7** were also confirmed by X-ray crystallography.

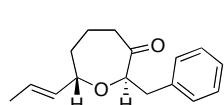

**(2R,7S)-2-Benzyl-7-((E)-prop-1-en-1-yl)oxepan-3-one**

$^1\text{H NMR}$  (400 MHz,  $\text{C}_6\text{D}_6$ )  $\delta$  7.19-7.23 (m, 2H), 7.12-7.15 (m, 2H), 7.04-7.09 (m, 1H), 5.11-5.27 (m, 2H), 4.08 (dd,  $J = 3.6, 8.8$ , 1H), 3.91 (m, 1H), 3.23 (dd,  $J = 3.6, 14.4$ , 1H), 2.79 (dd,  $J = 8.8, 14.4$ , 1H), 2.46-2.54 (m, 1H), 2.27-2.36 (m, 1H), 1.41 (d,  $J = 5.6$ , 3H), 1.32-1.37 (m, 3H), 1.22-1.32 (m, 1H);  $^{13}\text{C NMR}$  (100 MHz,  $\text{C}_6\text{D}_6$ ) 212.9, 138.5, 130.9, 129.8, 127.6, 126.5, 126.1, 81.3, 76.4, 40.2, 37.0, 33.1, 21.3, 17.4; IR (neat) 3061, 3028, 2933, 2863, 1711, 1604, 1459, 1452, 1324, 1180, 1093, 968, 785  $\text{cm}^{-1}$ ; HRMS (ESI) calcd for  $\text{C}_{16}\text{H}_{20}\text{O}_2\text{Na}$   $[\text{M} + \text{Na}]^+$  267.1361, found 267.1379.

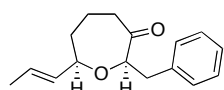

**(2R,7R)-2-benzyl-7-((E)-prop-1-en-1-yl)oxepan-3-one**

$^1\text{H NMR}$  (400 MHz,  $\text{CDCl}_3$ )  $\delta$  7.20-7.32 (m, 5H), 5.40-5.56 (m, 2H), 4.03 (dd,  $J = 4.0, 8.4$ , 1H), 3.66 (d,  $J = 9.4$ , 1H), 3.06 (dd,  $J = 3.6, 14.0$ , 1H), 2.89 (dd,  $J = 9.0, 14.0$ , 1H), 2.69 (dt,  $J = 2.4, 12.4$ , 1H), 2.32 (dd,  $J = 6.4, 12.0$ , 1H), 1.90-1.99 (m, 1H), 1.80-1.88 (m, 1H), 1.64 (d,  $J = 6.0$ , 3H), 1.58-1.69 (m, 1H), 1.41-1.54 (m, 1H);  $^{13}\text{C NMR}$  (100 MHz,  $\text{CDCl}_3$ ) 216.3, 137.6, 131.8, 129.6, 128.1, 126.4, 125.7, 87.1, 83.2, 41.6, 39.2, 36.2, 23.3, 17.4; IR (neat) 3061, 3029, 2931, 2859, 1711, 1603, 1495, 1452, 1434, 1319, 1173, 1107, 966, 735  $\text{cm}^{-1}$ ; HRMS (ESI) calcd for  $\text{C}_{16}\text{H}_{20}\text{O}_2\text{Na}$   $[\text{M} + \text{Na}]^+$  267.1361, found 267.1350.

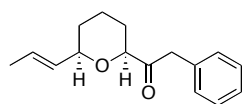

**2-Phenyl-1-((2S,6R)-6-((E)-prop-1-en-1-yl)tetrahydro-2H-pyran-2-yl)ethanone**

$^1\text{H NMR}$  (400 MHz,  $\text{C}_6\text{D}_6$ )  $\delta$  7.22-7.28 (m, 2H), 7.12-7.17 (m, 2H), 7.03-7.09 (m, 1H), 5.65 (ddq,  $J = 0.8, 6.4, 15.2$ , 1H), 5.53 (ddq,  $J = 1.6, 5.6, 15.2$ , 1H), 3.92 (d,  $J = 15.2$ , 1H), 3.84 (d,  $J = 15.2$ , 1H), (3.61 (dd,  $J = 2.4, 11.2$ , 1H), 3.51 (ddt,  $J = 1.2, 5.6, 10.2$ , 1H), 1.70-1.76 (m, 1H), 1.60 (dt,  $J = 1.2, 6.4$ , 3H), 1.43-1.49 (m, 1H), 1.25-1.30 (m, 1H), 1.02-1.21 (m, 3H);  $^{13}\text{C NMR}$  (100 MHz,  $\text{C}_6\text{D}_6$ ) 206.7, 134.7, 132.5, 130.0, 128.3, 126.5, 125.5, 82.0, 78.0, 44.7, 31.4, 27.5, 22.9, 17.6; IR (neat) 3061, 3029, 2936, 2855, 1722, 1601, 1495, 1452, 1299, 1199, 1095, 1034, 965, 742, 702  $\text{cm}^{-1}$ ; HRMS (ESI) calcd for  $\text{C}_{16}\text{H}_{20}\text{O}_2\text{Na}$   $[\text{M} + \text{Na}]^+$  267.1361, found 267.1406.

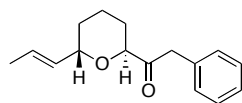

**2-Phenyl-1-((2S,6S)-6-((E)-prop-1-en-1-yl)tetrahydro-2H-pyran-2-yl)ethanone**

$^1\text{H NMR}$  (400 MHz,  $\text{CDCl}_3$ )  $\delta$  7.30-7.35 (m, 2H), 7.22-7.28 (m, 3H), 5.72 (ddt,  $J = 1.2, 6.4, 15.2$ , 1H), 5.56 (ddt,  $J = 1.6, 5.6, 15.2$ , 1H), 4.30 (t,  $J = 5.0$ , 1H), 4.11 (t,  $J = 5.6$ , 1H), 3.95 (d,  $J = 15.2$ , 1H), 3.85 (d,  $J = 15.2$ , 1H), 1.83-1.91 (m, 1H), 1.74 (dt,  $J = 1.2, 6.4$ , 3H), 1.64-1.72 (m, 3H), 1.44-1.62 (m, 2H);  $^{13}\text{C NMR}$  (100 MHz,  $\text{CDCl}_3$ ) 209.6, 134.2, 131.0, 128.5, 128.0, 126.8, 77.3, 74.4, 45.3, 30.2, 25.2, 19.3, 17.9; IR (neat) 3029, 2936, 2854, 1717, 1601, 1495, 1453, 1260, 1202, 1084, 1028, 965, 797  $\text{cm}^{-1}$ ; HRMS (ESI) calcd for  $\text{C}_{16}\text{H}_{20}\text{O}_2\text{Na}$   $[\text{M} + \text{Na}]^+$  267.1361, found 267.1359.

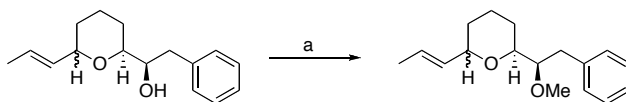

Reagents and conditions  
a) NaH, THF, then MeI, 88%.

**Scheme 3. Synthesis of 13.**

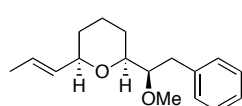

**(2S,6R)-2-((R)-1-Methoxy-2-phenylethyl)-6-((E)-prop-1-en-1-yl) tetrahydro-2H-pyran (13-cis)**

$^1\text{H NMR}$  (400 MHz,  $\text{CDCl}_3$ )  $\delta$  7.20-7.35 (m, 5H), 5.73 (dt,  $J = 6.4, 15.6$ , 1H), 5.56 (dd,

$J = 4.4, 15.6, 1\text{H}$ ), 3.74 (dd,  $J = 5.6, 10.4, 1\text{H}$ ), 3.41 (q,  $J = 6.0, 1\text{H}$ ), 3.36 (s, 3H), 3.23 (ddd,  $J = 1.8, 5.8, 11.0, 1\text{H}$ ), 2.95 (dd,  $J = 4.4, 14.0, 1\text{H}$ ), 2.85 (dd,  $J = 6.8, 14.0, 1\text{H}$ ), 1.86-1.94 (m, 1H), 1.76-1.82 (m, 1H), 1.74 (d,  $J = 6.4, 3\text{H}$ ), 1.59-1.66 (m, 1H), 1.44-1.56 (m, 1H), 1.28-1.41 (m, 2H);  $^{13}\text{C}$  NMR (100 MHz,  $\text{CDCl}_3$ ) 139.0, 132.7, 129.7, 128.1, 126.0, 125.9, 84.8, 78.7, 78.2, 58.8, 36.7, 31.9, 26.7, 23.3, 17.9; IR (neat) 3061, 3027, 2932, 2855, 1603, 1495, 1453, 1352, 1301, 1196, 1103, 1037, 964, 749  $\text{cm}^{-1}$ ; HRMS (ESI) calcd for  $\text{C}_{17}\text{H}_{24}\text{O}_2\text{Na}$   $[\text{M} + \text{Na}]^+$  283.1674, found 283.1684.

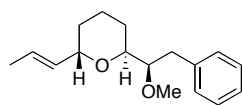

**(2S,6S)-2-((R)-1-Methoxy-2-phenylethyl)-6-((E)-prop-1-en-1-yl) tetrahydro-2H-pyran (13-trans)**

$^1\text{H}$  NMR (400 MHz,  $\text{CDCl}_3$ )  $\delta$  7.24-7.33 (m, 4H), 7.18-7.24 (m, 1H), 5.55-5.69 (m, 2H), 3.58 (ddd,  $J = 2.4, 6.0, 9.6, 1\text{H}$ ), 3.41 (ddd,  $J = 4.0, 6.8, 7.2, 1\text{H}$ ), 3.27 (s, 3H), 3.98 (dd,  $J = 3.6, 14.0, 1\text{H}$ ), 3.75 (dd,  $J = 7.2, 14.0, 1\text{H}$ ), 1.62-1.82 (m, 4H), 1.71 (d,  $J = 5.2, 3\text{H}$ ), 1.46-1.60 (m, 2H);  $^{13}\text{C}$  NMR (100 MHz,  $\text{CDCl}_3$ ) 139.3, 130.9, 129.7, 128.1, 127.6, 125.9, 83.8, 72.9, 71.9, 58.7, 36.8, 29.5, 26.5, 18.8, 18.0; IR (neat) 3061, 3027, 2932, 2824, 1603, 1494, 1453, 1378, 1352, 1200, 1105, 1036, 966, 887, 749  $\text{cm}^{-1}$ ; HRMS (ESI) calcd for  $\text{C}_{17}\text{H}_{24}\text{O}_2\text{Na}$   $[\text{M} + \text{Na}]^+$  283.1674, found 283.1678.

**Isomerization of 13-cis and 13-trans**

To a mixture of **13-cis** and **13-trans** (12 mg, 0.048 mmol, dr = 1:1) in  $\text{CH}_2\text{Cl}_2$  (2 ml) was added  $\text{Re}_2\text{O}_7$  (1 mg, 0.002 mmol). The reaction was stirred rt for 5 h, then was quenched with 5 drops of pyridine. After evaporation of the solvent, the crude mixture was purified by flash chromatography (5%-10% ethyl acetate in hexanes) to give the product (11 mg, 90%, dr > 30:1).

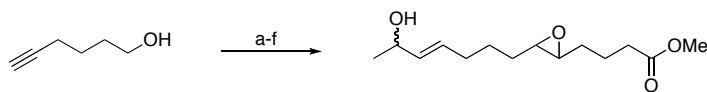

**Reagents and conditions**

a) DIBAL-H, hexanes, then  $\text{I}_2$ , THF,  $-78^\circ\text{C}$ , 51%. b) Pent-4-en-1-ylmagnesium bromide, (dppf) $\text{PdCl}_2$ ,  $\text{Et}_2\text{O}$ , 65%. c) Jones reagent,  $0^\circ\text{C}$ , 64%. d)  $\text{K}_2\text{CO}_3$ , MeI, DMF, 99%. e) *m*-CPBA,  $\text{NaHCO}_3$ ,  $\text{CH}_2\text{Cl}_2$ ,  $0^\circ\text{C}$ , 67%. f) (Z)-Hex-3-ene-2,5-diol, Grubbs-Hoveyda 2nd generation metathesis catalyst,  $\text{CH}_2\text{Cl}_2$ , 57%.

**Scheme 4. Synthesis of 14.**

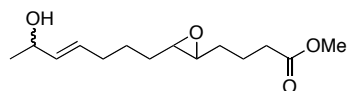

**(E)-Methyl 4-(3-(6-hydroxyhept-4-en-1-yl)oxiran-2-yl) butanoate (14)**

$^1\text{H}$  NMR (400 MHz,  $\text{CDCl}_3$ )  $\delta$  5.58 (dt,  $J = 6.4, 15.2, 1\text{H}$ ), 5.49 (dd,  $J = 6.4, 15.2, 1\text{H}$ ), 4.22 (p,  $J = 6.0, 1\text{H}$ ), 3.64 (s, 3H), 2.62-2.67 (m, 2H), 2.34 (dt,  $J = 1.4, 7.2, 2\text{H}$ ), 2.01-2.08 (m, 2H), 1.82 (br, 1H), 1.68-1.80 (m, 2H), 1.42-1.62 (m, 6H), 1.22 (d,  $J = 6.4, 3\text{H}$ );  $^{13}\text{C}$  NMR (100 MHz,  $\text{CDCl}_3$ ) 173.7, 134.8, 130.0, 68.7, 58.4, 58.2, 51.6, 33.6, 31.8, 31.40, 31.37, 25.5, 23.4, 21.5; IR (neat) 3433, 2928, 2860, 1737, 1438, 1367, 1248, 1169, 1117, 1061, 970, 893  $\text{cm}^{-1}$ ; HRMS (ESI) calcd for  $\text{C}_{14}\text{H}_{24}\text{O}_4\text{Na}$   $[\text{M} + \text{Na}]^+$  279.1572, found 279.1552.

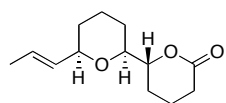

**(2R,2'S,6'R)-6'-((E)-Prop-1-en-1-yl)hexahydro-2H,2'H-[2,2'-bipyran]-6(3H)-one (15)**

The general rearrangement procedure was followed with **14** (32 mg, 0.125 mmol),  $\text{Re}_2\text{O}_7$  (3 mg, 0.006 mmol), and  $\text{CH}_2\text{Cl}_2$  (12.5 mL). The reaction was stirred at rt for 12 h. The solvent was then removed under reduced pressure and the reaction mixture was kept at high vacuum for 1 hr, after which the reaction mixture was redispersed in  $\text{CH}_2\text{Cl}_2$  (12.5 mL) and 5% more catalyst was added. The reaction mixture was stirred at rt for another 12 h, then was quenched with 5 drops of pyridine. After the removal of solvent under reduced pressure, the crude mixture was purified by flash chromatography (20%-30% ethyl acetate in hexanes) to give the product (23 mg, purity: 87%, 71% with respect to the desired product).  $^1\text{H}$  NMR (400 MHz,  $\text{CDCl}_3$ )  $\delta$  5.66 (ddq,  $J = 0.8, 6.4, 15.2, 1\text{H}$ ), 5.46 (ddq,  $J = 1.2, 6.0, 15.2, 1\text{H}$ ), 4.17 (ddd,  $J = 3.6, 6.4, 10.4, 1\text{H}$ ), 3.79 (dd,  $J = 6.0, 10.4, 1\text{H}$ ), 3.42 (ddd,  $J = 2.0, 6.0, 11.2, 1\text{H}$ ), 2.52-2.62 (m, 1H), 2.41-2.51 (m, 1H), 2.06-2.14 (m, 1H), 1.75-1.98 (m, 4H), 1.68 (d,  $J = 6.4, 3\text{H}$ ),

1.57-1.72 (m, 2H), 1.46-1.56 (m, 1H), 1.20-1.37 (m, 2H);  $^{13}\text{C}$  NMR (100 MHz,  $\text{CDCl}_3$ ) 171.5, 132.2, 126.4, 82.5, 78.8, 78.3, 31.6, 29.8, 27.2, 24.0, 22.9, 18.1, 17.9; IR (neat) 2935, 2855, 1738, 1440, 1346, 1240, 1203, 1169, 1089, 1049, 965, 933  $\text{cm}^{-1}$ ; HRMS (ESI) calcd for  $\text{C}_{13}\text{H}_{21}\text{O}_3$   $[\text{M} + \text{H}]^+$  225.1491, found 225.1481.

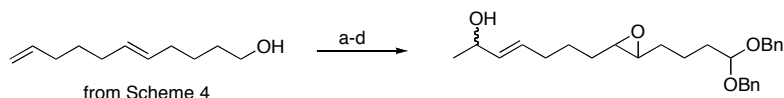

**Reagents and conditions**

a) PCC, Celite,  $\text{CH}_2\text{Cl}_2$ . b) BnOH, *p*-TsOH,  $\text{Na}_2\text{SO}_4$ ,  $\text{CH}_2\text{Cl}_2$ , 67% (two steps). c) *m*-CPBA,  $\text{NaHCO}_3$ ,  $\text{CH}_2\text{Cl}_2$ , 0 °C, 57%. d) (*Z*)-Hex-3-ene-2,5-diol, Grubbs-Hoveyda 2nd generation metathesis catalyst,  $\text{CH}_2\text{Cl}_2$ , 73%.

**Scheme 5. Synthesis of 16.**

**(*E*)-7-(3-(4,4-Bis(benzyloxy)butyl)oxiran-2-yl)hept-3-en-2-ol (16)**  
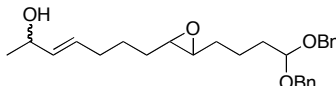  
 $^1\text{H}$  NMR (400 MHz,  $\text{CDCl}_3$ )  $\delta$  7.34-7.40 (m, 8H), 7.28-7.34 (m, 2H), 5.63 (dt,  $J$  = 6.4, 15.2, 1H), 5.54 (dd,  $J$  = 6.4, 15.2, 1H), 4.76 (t,  $J$  = 6.0, 1H), 4.68 (dd,  $J$  = 0.8, 12.0, 2H), 4.58 (d,  $J$  = 12.0, 2H), 4.26 (p,  $J$  = 6.4, 1H), 2.62-2.70 (m, 2H), 2.03-2.13 (m, 2H), 1.76-1.86 (m, 2H), 1.64 (br, 1H), 1.45-1.62 (m, 8H), 1.26 (d,  $J$  = 6.4, 3H);  $^{13}\text{C}$  NMR (100 MHz,  $\text{CDCl}_3$ ) 138.2, 134.8, 130.2, 128.5, 127.8, 127.7, 101.9, 68.8, 67.33, 67.28, 58.6, 33.1, 31.9, 31.8, 31.5, 25.6, 23.5, 21.4; IR (neat) 3444, 3030, 2929, 2863, 1605, 1496, 1454, 1366, 1307, 1207, 1123, 1046, 970, 737  $\text{cm}^{-1}$ ; HRMS (ESI) calcd for  $\text{C}_{27}\text{H}_{36}\text{O}_4\text{Na}$   $[\text{M} + \text{Na}]^+$  447.2511, found 447.2531.

**(2*R*,2'*S*,6*R*,6'*R*)-6-(Benzyloxy)-6'-((*E*)-prop-1-en-1-yl)octahydro-2*H*,2'*H*-2,2'-bipyran (17a) and (2*R*,2'*S*,6*S*,6'*R*)-6-(benzyloxy)-6'-((*E*)-prop-1-en-1-yl) octahydro-2*H*,2'*H*-2,2'-bipyran (17b)**  
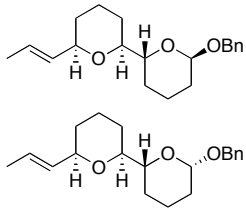  
The general rearrangement procedure was followed with **16** (30 mg, 0.071 mmol),  $\text{Ph}_3\text{SiOReO}_3$  (1.8 mg, 0.0036 mmol), and  $\text{CH}_2\text{Cl}_2$  (7 mL). The reaction was stirred at -25 °C for 8 h (when all starting materials was consumed), and then at 20 °C for another 12 h before being quenched with five drops of pyridine. After evaporation of the solvent, the crude mixture was purified by flash chromatography (2%-5% ethyl acetate in hexanes) to give the product (12.6 mg, 56%, dr = 5:2).  $^1\text{H}$  NMR (400 MHz,  $\text{C}_6\text{D}_6$ )  $\delta$  7.35-7.39 (m, 2H), 7.16-7.21 (m, 2H), 7.07-7.13 (m, 1H), 5.69 (ddq,  $J$  = 0.8, 6.4, 15.2, 1H), 5.59 (ddq,  $J$  = 1.2, 5.2, 15.2, 1H), 4.88 (d,  $J$  = 2.8, 1H), 4.80 (d,  $J$  = 12.0, 1H), 4.39 (d,  $J$  = 12.0, 1H), 3.91 (ddd,  $J$  = 2.0, 6.8, 10.8, 1H), 3.74 (dd,  $J$  = 5.2, 9.6, 1H), 3.33 (ddd,  $J$  = 2.0, 6.8, 10.4, 1H), 2.00-2.07 (m, 1H), 1.88-1.99 (m, 2H), 1.61-1.75 (m, 2H), 1.58 (dt,  $J$  = 1.2, 6.4, 3H), 1.27-1.54 (m, 7H);  $^{13}\text{C}$  NMR (100 MHz,  $\text{C}_6\text{D}_6$ ) 138.8, 133.3, 128.2, 127.9, 127.3, 124.6, 96.2, 80.3, 77.9, 71.8, 68.8, 32.2, 30.0, 27.9, 27.8, 23.3, 18.0, 17.6; IR (neat) 3029, 2932, 2854, 1496, 1453, 1440, 1360, 1302, 1195, 1126, 1079, 1036, 964, 734  $\text{cm}^{-1}$ ; HRMS (ESI) calcd for  $\text{C}_{20}\text{H}_{28}\text{O}_3\text{Na}$   $[\text{M} + \text{Na}]^+$  339.1936, found 339.1923. Second compound:  $^1\text{H}$  NMR (400 MHz,  $\text{C}_6\text{D}_6$ )  $\delta$  7.36-7.40 (m, 2H), 7.17-7.21 (m, 2H), 7.08-7.12 (m, 1H), 5.55-5.70 (m, 2H), 4.95 (d,  $J$  = 12.0, 1H), 4.55 (d,  $J$  = 12.0, 1H), 4.33 (dd,  $J$  = 2.0, 9.2, 1H), 3.72 (dd,  $J$  = 4.8, 10.0, 1H), 3.38 (ddd,  $J$  = 2.0, 7.2, 10.4, 1H), 5.25 (ddd,  $J$  = 2.0, 7.2, 10.4, 1H), 1.96-2.02 (m, 1H), 1.88-1.94 (m, 1H), 1.64-1.76 (m, 2H), 1.58 (d,  $J$  = 6.0, 3H), 1.50-1.61 (m, 2H), 1.41-1.49 (m, 1H), 1.14-1.40 (m, 5H);  $^{13}\text{C}$  NMR (100 MHz,  $\text{C}_6\text{D}_6$ ) 138.7, 133.2, 128.2, 127.6, 127.3, 124.8, 101.3, 80.2, 78.9, 77.9, 69.4, 32.3, 31.5, 28.2, 27.8, 23.2, 21.8, 17.6; IR (neat) 3030, 2933, 2854, 1496, 1453, 1439, 1360, 1305, 1261, 1199, 1123, 1086, 1024, 964, 732  $\text{cm}^{-1}$ ; HRMS (ESI) calcd for  $\text{C}_{20}\text{H}_{28}\text{O}_3\text{Na}$   $[\text{M} + \text{Na}]^+$  339.1936, found 339.1945.

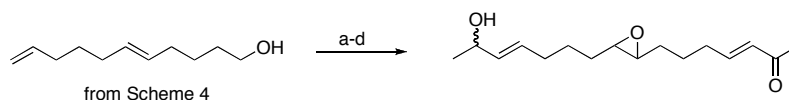

from Scheme 4

**Reagents and conditions**

a) PCC, Celite, CH<sub>2</sub>Cl<sub>2</sub>. b) NaH, (EtO)<sub>2</sub>P(O)CH<sub>2</sub>C(O)CH<sub>3</sub>, THF, 0 °C, 78% (two steps). c) *m*-CPBA, NaHCO<sub>3</sub>, CH<sub>2</sub>Cl<sub>2</sub>, 0 °C, 66%. d) (*Z*)-Hex-3-ene-2,5-diol, Grubbs-Hoveyda 2nd generation metathesis catalyst, CH<sub>2</sub>Cl<sub>2</sub>, 56%.

**Scheme 6. Synthesis of 18.**

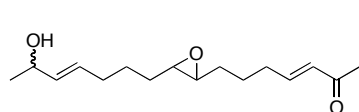

**(*E*)-7-(3-((*E*)-6-Hydroxyhept-4-en-1-yl)oxiran-2-yl)hept-3-en-2-one (18)**

<sup>1</sup>H NMR (400 MHz, CDCl<sub>3</sub>) δ 6.78 (dt, *J* = 6.8, 16.0, 1H), 6.08 (d, *J* = 16.0, 1H), 5.62 (dt, *J* = 6.4, 15.2, 1H), 5.52 (dd, *J* = 6.4, 15.2, 1H), 5.26 (p, *J* = 6.4, 1H), 2.64-2.69 (m, 2H), 2.28 (q, *J* = 6.8, 2H), 2.24 (s, 3H), 2.03-2.10 (m, 2H), 1.57-1.70 (m, 4H), 1.45-1.57 (m, 5H), 1.25 (d, *J* = 6.4, 3H); <sup>13</sup>C NMR (100 MHz, CDCl<sub>3</sub>) 198.7, 147.6, 134.8, 131.6, 130.1, 68.8, 58.5, 58.3, 32.1, 31.8, 31.5, 31.4, 27.0, 25.5, 24.6, 23.5; IR (neat) 3446, 2969, 2930, 2859, 1673, 1626, 1454, 1363, 1255, 1145, 1062, 974, 894 cm<sup>-1</sup>; HRMS (ESI) calcd for C<sub>16</sub>H<sub>26</sub>O<sub>3</sub>Na [M + Na]<sup>+</sup> 289.1780, found 289.1795.

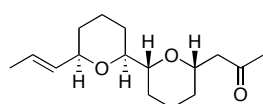

**1-((2*R*,2'*S*,6*S*,6'*R*)-6'-((*E*)-Prop-1-en-1-yl)octahydro-2*H*,2'*H*-[2,2'-bipyran]-6-yl)propan-2-one (19)**

The general rearrangement procedure was followed with **18** (22 mg, 0.083 mmol), Re<sub>2</sub>O<sub>7</sub> (2 mg, 0.004 mmol), and CH<sub>2</sub>Cl<sub>2</sub> (8.3 mL). The reaction was stirred at rt for 3.5 days, then was quenched with five drops of pyridine. Me<sub>2</sub>(Bn)SiH (5 μl) was added as an internal standard and crude NMR was used to determine the yield of 59% (dr >20:1). <sup>1</sup>H NMR (400 MHz, CDCl<sub>3</sub>) δ 5.66 (ddq, *J* = 0.8, 6.4, 15.2, 1H), 5.49 (ddq, *J* = 1.6, 6.0, 15.2, 1H), 3.72-3.81 (m, 2H), 3.15-3.25 (m, 2H), 2.64 (dd, *J* = 8.2, 15.0, 1H), 2.42 (dd, *J* = 4.6, 15.0, 1H), 2.18 (s, 3H), 1.76-1.95 (m, 2H), 1.68 (d, *J* = 6.4, 3H), 1.55-1.64 (m, 2H), 1.42-1.55 (m, 2H), 1.11-1.34 (m, 4H); <sup>13</sup>C NMR (100 MHz, CDCl<sub>3</sub>) 207.9, 132.6, 126.2, 80.8, 80.3, 78.1, 74.7, 50.5, 31.9, 31.7, 30.8, 28.0, 27.9, 23.1, 23.0, 17.9; IR (neat) 2928, 2846, 1707, 1439, 1405, 1379, 1360, 1319, 1305, 1194, 1170, 1091, 1042, 963 cm<sup>-1</sup>; HRMS (EI) calcd for C<sub>16</sub>H<sub>26</sub>O<sub>3</sub> [M]<sup>+</sup> 289.1780, found 289.1766.

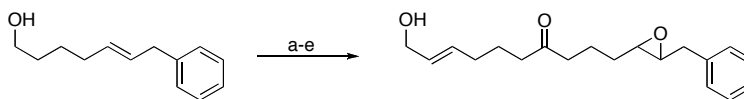

from Scheme 1

**Reagents and conditions**

a) PCC, Celite, CH<sub>2</sub>Cl<sub>2</sub>. b) Pent-4-en-1-ylmagnesium bromide, Et<sub>2</sub>O, 70% (two steps). c) PCC, Celite, CH<sub>2</sub>Cl<sub>2</sub>, 93%. d) *m*-CPBA, NaHCO<sub>3</sub>, CH<sub>2</sub>Cl<sub>2</sub>, 0 °C, 52%. e) But-2-ene-1,4-diol, Grubbs-Hoveyda 2nd generation metathesis catalyst, CH<sub>2</sub>Cl<sub>2</sub>, 59%.

**Scheme 7. Synthesis of 20.**

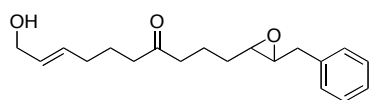

**(*E*)-1-(3-Benzyloxiran-2-yl)-10-hydroxydec-8-en-4-one (20)**

<sup>1</sup>H NMR (400 MHz, CDCl<sub>3</sub>) δ 7.29-7.35 (m, 2H), 7.22-7.27 (m, 3H), 5.59-5.69 (m, 2H), 4.08 (d, *J* = 2.0, 2H), 2.88-2.96 (m, 2H), 2.75-2.83 (m, 2H), 2.41 (d, *J* = 7.2, 2H), 2.37 (d, *J* = 7.2, 2H), 2.01-2.11 (m, 2H), 1.92 (br, 1H), 1.56-1.77 (m, 5H), 1.49 (p, *J* = 7.2, 1H); <sup>13</sup>C NMR (100 MHz, CDCl<sub>3</sub>) 210.6, 137.3, 131.8, 130.0, 128.9, 128.6, 126.6, 63.5, 58.6, 58.4, 42.0, 41.9, 38.4, 31.6, 31.2, 23.0, 20.2; IR (neat) 3443, 3027, 2934, 2863, 1709, 1604, 1494, 1453, 1410, 1089, 1001, 972, 744 cm<sup>-1</sup>; HRMS (ESI) calcd for C<sub>19</sub>H<sub>27</sub>O<sub>3</sub> [M + H]<sup>+</sup> 303.1960, found 303.1942.

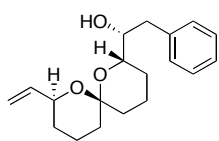

**(R)-2-Phenyl-1-((2S,6S,8S)-8-vinyl-1,7-dioxaspiro[5.5]undecan-2-yl) ethanol (21)**

The general rearrangement procedure was followed with **20** (34 mg, 0.11 mmol),  $\text{Re}_2\text{O}_7$  (3 mg, 0.006 mmol), and  $\text{CH}_2\text{Cl}_2$  (11.2 mL). The reaction was stirred at rt for 20 h, then was quenched with five drops of pyridine. After evaporation of the solvent, the crude mixture was purified by flash chromatography (10%-15% ethyl acetate in hexanes) to give the product (32 mg, 93%).  $^1\text{H}$  NMR (400 MHz,  $\text{CDCl}_3$ )  $\delta$  7.23-7.37 (m, 5H), 5.85 (ddd,  $J = 5.6, 10.4, 17.2$ , 1H), 5.20 (dt,  $J = 1.6, 17.2$ , 1H), 5.09 (dt,  $J = 1.6, 10.4$ , 1H), 4.04 (dddd,  $J = 0.8, 1.2, 2.6, 5.6, 11.2$ , 1H), 3.86 (p,  $J = 4.4$ , 1H), 3.00 (dd,  $J = 4.0, 14.0$ , 1H), 2.68 (dd,  $J = 9.2, 14.0$ , 1H), 1.86-2.04 (m, 3H), 1.74-1.82 (m, 1H), 1.57-1.73 (m, 5H), 1.41-1.51 (m, 2H), 1.27-1.41 (m, 2H);  $^{13}\text{C}$  NMR (100 MHz,  $\text{CDCl}_3$ ) 139.4, 138.9, 129.3, 128.5, 126.4, 114.5, 96.6, 75.1, 71.7, 70.0, 39.3, 35.5, 35.0, 30.6, 24.9, 18.7, 18.2; IR (neat) 3470, 3062, 2938, 2868, 1646, 1603, 1495, 1453, 1438, 1373, 1279, 1222, 1142, 1059, 980, 915, 747  $\text{cm}^{-1}$ ; HRMS (ESI) calcd for  $\text{C}_{19}\text{H}_{27}\text{O}_3$   $[\text{M} + \text{H}]^+$  303.1960, found 303.1979.

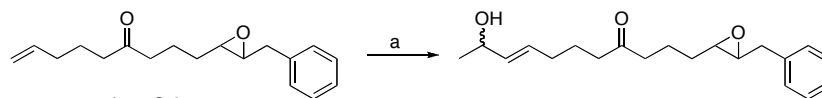

from Scheme 7  
**Reagents and conditions**  
 a) (Z)-Hex-3-ene-2,5-diol, Grubbs-Hoveyda 2nd generation metathesis catalyst,  $\text{CH}_2\text{Cl}_2$ , 75%.

**Scheme 8. Synthesis of 25.**

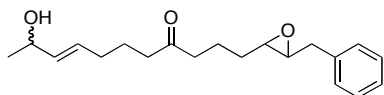

**(E)-1-(3-Benzyloxiran-2-yl)-10-hydroxyundec-8-en-4-one (25)**

$^1\text{H}$  NMR (400 MHz,  $\text{CDCl}_3$ )  $\delta$  7.28-7.33 (m, 2H), 7.20-7.26 (m, 3H), 5.48-5.61 (m, 2H), 4.24 (p,  $J = 6.4$ , 1H), 2.87-2.93 (m, 2H), 2.73-2.82 (m, 2H), 2.39 (t,  $J = 7.6$ , 2H), 2.35 (t,  $J = 7.6$ , 2H), 2.06 (br, 1H), 2.00 (q,  $J = 6.8$ , 2H), 1.54-1.74 (m, 5H), 1.48 (p,  $J = 7.2$ , 1H), 1.24 (d,  $J = 6.4$ , 3H);  $^{13}\text{C}$  NMR (100 MHz,  $\text{CDCl}_3$ ) 210.5, 137.3, 135.2, 129.6, 128.9, 128.6, 126.6, 68.6, 58.6, 58.4, 42.0, 41.9, 38.4, 31.5, 31.2, 23.5, 23.1, 20.2; IR (neat) 3450, 3061, 2968, 2930, 1709, 1604, 1494, 1452, 1409, 1370, 1138, 1063, 970, 743  $\text{cm}^{-1}$ ; HRMS (ESI) calcd for  $\text{C}_{20}\text{H}_{29}\text{O}_3$   $[\text{M} + \text{H}]^+$  317.2117, found 317.2095.

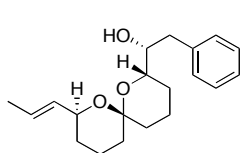

**(R)-2-Phenyl-1-((2S,6S,8S)-8-((E)-prop-1-en-1-yl)-1,7-dioxaspiro[5.5]undecan-2-yl)ethanol (26)**

The general rearrangement procedure was followed with **25** (12 mg, 0.038 mmol),  $\text{O}_3\text{ReOSiPh}_3$  (1 mg, 0.002 mmol), and  $\text{CH}_2\text{Cl}_2$  (3.8 mL). The reaction was initiated at  $-78$   $^\circ\text{C}$  followed by warming to  $-30$   $^\circ\text{C}$ , stirring at  $-30$   $^\circ\text{C}$  for 90 min (complete consumption of starting material), then warming to  $0$   $^\circ\text{C}$  and string for 4 h. The reaction was quenched immediately with five drops of pyridine when TLC indicated that one major product was present. After evaporation of the solvent, the crude mixture was purified by flash chromatography (10%-15% ethyl acetate in hexanes) to give the product (8.5 mg, 71%).  $^1\text{H}$  NMR (400 MHz,  $\text{CDCl}_3$ )  $\delta$  7.21-7.35 (m, 5H), 5.55 (ddq,  $J = 0.8, 6.4, 15.6$ , 1H), 5.46 (ddq,  $J = 1.2, 6.4, 15.6$ , 1H), 3.94 (dd,  $J = 6.0, 11.6$ , 1H), 3.85 (p,  $J = 4.4$ , 1H), 3.58 (ddd,  $J = 2.4, 4.8, 11.6$ , 1H), 2.98 (dd,  $J = 4.4, 13.6$ , 1H), 2.68 (dd,  $J = 9.2, 13.6$ , 1H), 1.97 (br, 1H), 1.88 (tq,  $J = 4.0, 12.8$ , 2H), 1.72-1.80 (m, 1H), 1.69 (d,  $J = 6.4$ , 3H), 1.54-1.66 (m, 5H), 1.35-1.48 (m, 3H), 1.25-1.34 (m, 1H);  $^{13}\text{C}$  NMR (100 MHz,  $\text{CDCl}_3$ ) 138.8, 132.3, 129.3, 128.5, 126.9, 126.3, 96.6, 75.1, 71.5, 70.0, 39.3, 35.5, 35.0, 30.8, 24.8, 18.8, 18.3, 17.9; IR (neat) 3464, 3060, 2937, 2868, 1603, 1495, 1453, 1439, 1377, 1279, 1221, 1203, 1142, 1042, 979, 746  $\text{cm}^{-1}$ ; HRMS (ESI) calcd for  $\text{C}_{20}\text{H}_{29}\text{O}_3$   $[\text{M} + \text{H}]^+$  317.2117, found 317.2141.



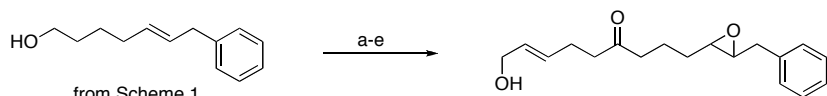

**Reagents and conditions**

a) PCC, Celite, CH<sub>2</sub>Cl<sub>2</sub>. b) But-3-en-1-ylmagnesium bromide Et<sub>2</sub>O, 0 °C, 77% (two steps). c) PCC, Celite, CH<sub>2</sub>Cl<sub>2</sub>, 86%. d) m-CPBA, NaHCO<sub>3</sub>, CH<sub>2</sub>Cl<sub>2</sub>, 0 °C, 49%. e) But-2-ene-1,4-diol, Grubbs-Hoveyda 2nd generation metathesis catalyst, CH<sub>2</sub>Cl<sub>2</sub>, 71%.

**Scheme 9. Synthesis of 27.**

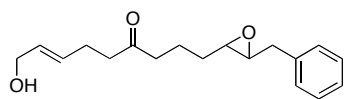

**(E)-1-(3-Benzyloxiran-2-yl)-9-hydroxynon-7-en-4-one (27)**

<sup>1</sup>H NMR (400 MHz, CD<sub>2</sub>Cl<sub>2</sub>) δ 7.27-7.33 (m, 2H), 7.19-7.26 (m, 3H), 5.57-5.68 (m, 2H), 4.01 (br, 2H), 2.76-2.89 (m, 3H), 2.73 (t, J = 5.6, 1H), 2.43 (t, J = 7.2, 2H), 2.39 (t, J = 7.2, 2H), 2.22-2.30 (m, 2H), 1.60-1.73 (m, 3H), 1.41-1.59 (m, 2H); <sup>13</sup>C NMR (100 MHz, CD<sub>2</sub>Cl<sub>2</sub>) 209.9, 138.1, 131.1, 130.5, 129.3, 128.8, 126.9, 63.6, 58.8, 58.6, 42.4, 42.3, 38.8, 31.6, 26.6, 20.5; IR (neat) 3433, 3027, 2929, 2862, 1710, 1494, 1453, 1410, 1373, 1089, 1007, 972, 745 cm<sup>-1</sup>; HRMS (ESI) calcd for C<sub>18</sub>H<sub>25</sub>O<sub>3</sub> [M + H]<sup>+</sup> 289.1804, found 289.1829.

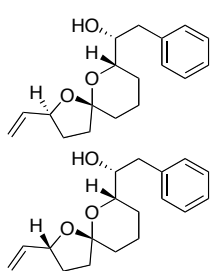

**(R)-2-Phenyl-1-((2S,5R,7S)-2-vinyl-1,6-dioxaspiro[4.5]decan-7-yl) ethanol (28) and (R)-2-phenyl-1-((2R,5R,7S)-2-vinyl-1,6-dioxaspiro[4.5]decan-7-yl) ethanol (29)**

The general rearrangement procedure was followed with **27** (29 mg, 0.10 mmol), Re<sub>2</sub>O<sub>7</sub> (2 mg, 0.005 mmol), and CH<sub>2</sub>Cl<sub>2</sub> (10 mL). The reaction was stirred for 3 h, then was quenched with five drops of pyridine. After evaporation of the solvent, the crude mixture was purified by flash chromatography (10%-15% ethyl acetate in hexanes) to give the product (27.5 mg, 95%, **28:29** = 50:49). The mixture was further purified for characterization. **28**: <sup>1</sup>H NMR (400 MHz, C<sub>6</sub>D<sub>6</sub>) δ 7.19-7.23 (m, 2H), 7.13-7.19 (m, 2H), 7.05-7.10 (m, 1H), 5.82 (ddd, J = 6.4, 10.4, 16.8, 1H), 5.22 (dt, J = 1.6, 16.8, 1H), 4.98 (dt, J = 1.6, 10.4, 1H), 4.49 (q, J = 6.4, 1H), 3.85 (ddd, J = 2.4, 5.2, 11.6, 1H), 3.75-3.83 (m, 1H), 2.83 (dd, J = 3.6, 14.0, 1H), 2.66 (dd, J = 9.2, 14.0, 1H), 1.87-2.19 (m, 2H), 1.77-1.87 (m, 1H), 1.59-1.67 (m, 3H), 1.47-1.59 (m, 3H), 1.31-1.47 (m, 2H); <sup>13</sup>C NMR (100 MHz, C<sub>6</sub>D<sub>6</sub>) 135.4, 129.5, 128.3, 127.6, 126.1, 114.0, 106.4, 78.7, 74.9, 73.3, 39.3, 37.5, 33.6, 30.3, 25.0, 19.8; IR (neat) 3463, 3027, 2945, 2872, 1644, 1603, 1495, 1454, 1439, 1370, 1271, 1222, 1071, 1036, 988, 874, 748 cm<sup>-1</sup>; HRMS (ESI) calcd for C<sub>18</sub>H<sub>25</sub>O<sub>3</sub> [M + H]<sup>+</sup> 289.1804, found 289.1828. **29**: <sup>1</sup>H NMR (300 MHz, C<sub>6</sub>D<sub>6</sub>) δ 7.12-7.23 (m, 4H), 7.04-7.11 (m, 1H), 5.91 (ddd, J = 7.2, 10.2, 17.4, 1H), 5.10 (ddd, J = 1.2, 1.8, 17.2, 1H), 4.95 (ddd, J = 0.9, 1.8, 10.4, 1H), 4.35 (q, J = 7.2, 1H), 3.96 (ddd, J = 2.4, 5.1, 11.4, 1H), 3.74-3.83 (m, 1H), 2.88 (dd, J = 3.9, 13.8, 1H), 2.69 (dd, J = 9.3, 13.8, 1H), 1.78-2.05 (m, 3H), 1.56-1.76 (m, 4H), 1.30-1.55 (m, 5H); <sup>13</sup>C NMR (100 MHz, C<sub>6</sub>D<sub>6</sub>) 141.1, 139.4, 129.4, 128.3, 126.0, 114.4, 106.2, 81.6, 75.1, 73.0, 39.5, 38.9, 33.6, 30.6, 25.1, 19.8; IR (neat) 3463, 3026, 2943, 2870, 1643, 1603, 1495, 1454, 1370, 1296, 1220, 1034, 988, 875, 747 cm<sup>-1</sup>; HRMS (ESI) calcd for C<sub>18</sub>H<sub>25</sub>O<sub>3</sub> [M + H]<sup>+</sup> 289.1804, found 289.1832.

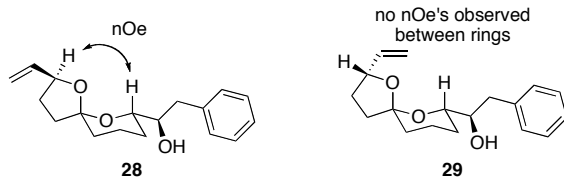

**Figure 1.** Spectral assignment for stereoisomers.

**Equilibration experiments**

Each stereoisomers was resubmitted to the following isomerization conditions: ~20mM solution, 5% Re<sub>2</sub>O<sub>7</sub>, stirring at rt for 18 h (no obvious change after 12 h) then quenching with 5 drops of pyridine. After evaporation of the solvent, the crude mixture was purified by flash chromatography (10%-15% ethyl acetate

in hexanes) to give the product (yield for each isomerization: ~90%-95%, dr = 11:9). Isomerization of **28** gave additional 19% of **29** while isomerization of **29** gave additional 22% of **28**. Thus after one recycling of isomerization: a total yield of 69% could be obtained for **28** and a total yield of 63% could be obtained for **29**. A second recycling gave a total yield of 78% for **28** and a total yield of 75% for **29**.

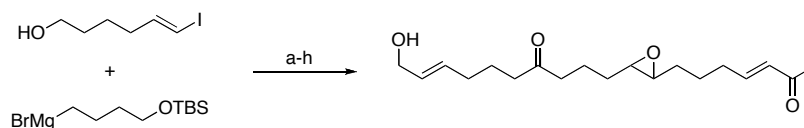

**Reagents and conditions**

a) (dppf)<sub>2</sub>PdCl<sub>2</sub>, Et<sub>2</sub>O, 79%. b) Py·SO<sub>3</sub>, DMSO, Et<sub>3</sub>N, CH<sub>2</sub>Cl<sub>2</sub>, 0 °C, 86%. c) Pent-4-en-1-ylmagnesium bromide, Et<sub>2</sub>O, 85%. d) Bu<sub>4</sub>NF, THF, 69%. e) PCC, Celite, CH<sub>2</sub>Cl<sub>2</sub>, 66%. f) NaH, THF, then (EtO)<sub>2</sub>P(O)CH<sub>2</sub>C(O)CH<sub>3</sub>, 0 °C, 87%. g) *m*-CPBA, NaHCO<sub>3</sub>, CH<sub>2</sub>Cl<sub>2</sub>, 70%. h) But-2-ene-1,4-diol, Grubbs-Hoveyda 2nd generation metathesis catalyst, CH<sub>2</sub>Cl<sub>2</sub>, 69%.

**Scheme 10. Synthesis of 30.**

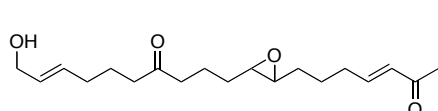

**(E)-10-Hydroxy-1-(3-((E)-6-oxohept-4-en-1-yl) oxiran-2-yl)dec-8-en-4-one (30)**

<sup>1</sup>H NMR (400 MHz, CD<sub>2</sub>Cl<sub>2</sub>) δ 6.76 (dt, *J* = 6.8, 16.0, 1H), 6.03 (dt, *J* = 1.6, 16.0, 1H), 5.56-5.67 (m, 2H), 4.02 (br, 2H), 2.60-2.65 (m, 2H), 2.43 (t, *J* = 7.2, 2H), 2.38 (t, *J* = 7.2, 2H), 2.26 (dq, *J* = 1.6, 7.2, 2H), 2.19 (s, 3H), 1.99-2.07 (m, 2H), 1.39-1.70 (m, 11H); <sup>13</sup>C NMR (100 MHz, CD<sub>2</sub>Cl<sub>2</sub>) 210.1, 198.2, 147.5, 131.6, 131.5, 130.1, 63.3, 58.1, 57.9, 42.1, 41.8, 32.1, 31.53, 31.46, 31.4, 26.6, 24.6, 23.1, 20.2; IR (neat) 3451, 2934, 2862, 11708, 1672, 1626, 1431, 1364, 1256, 1089, 976, 893 cm<sup>-1</sup>; HRMS (ESI) calcd for C<sub>19</sub>H<sub>30</sub>O<sub>4</sub>Na [M + Na]<sup>+</sup> 345.2042, found 345.2071.

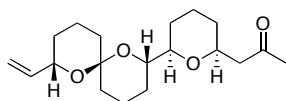

**1-((2S,6R)-6-((2S,6S,8S)-8-vinyl-1,7-dioxaspiro[5.5]undecan-2-yl) tetrahydro-2H-pyran-2-yl)propan-2-one (31)**

The general rearrangement procedure was followed with **30** (25 mg, 0.078 mmol), Re<sub>2</sub>O<sub>7</sub> (2 mg, 0.004 mmol), and CH<sub>2</sub>Cl<sub>2</sub> (7.8 mL). The reaction was stirred at 20 °C for 8 h, then was quenched with five drops of pyridine. After evaporation of the solvent, the crude mixture was purified by flash chromatography (10%-15% ethyl acetate in hexanes) to give the product (21 mg, 84%). <sup>1</sup>H NMR (400 MHz, CDCl<sub>3</sub>) δ 5.84 (ddd, *J* = 5.2, 10.4, 17.2, 1H), 5.23 (dt, *J* = 1.6, 17.2, 1H), 5.07 (dt, *J* = 1.6, 10.4, 1H), 4.04 (dddd, *J* = 1.2, 1.6, 2.8, 5.2, 11.6, 1H), 3.77 (dddd, *J* = 1.2, 4.4, 8.8, 10.4, 1H), 3.42 (ddd, *J* = 2.0, 8.0, 10.4, 1H), 3.18 (ddd, *J* = 2.0, 8.0, 10.4, 1H), 2.64 (dd, *J* = 8.8, 14.8, 1H), 2.41 (dd, *J* = 4.4, 14.8, 1H), 2.18 (s, 3H), 1.95-2.03 (m, 1H), 1.78-1.94 (m, 4H), 1.49-1.69 (m, 7H), 1.33-1.44 (m, 2H), 1.21-1.32 (m, 2H), 1.05-1.21 (m, 2H); <sup>13</sup>C NMR (100 MHz, CDCl<sub>3</sub>) 207.8, 139.5, 114.3, 96.1, 80.9, 74.8, 71.8, 69.7, 50.4, 35.6, 35.2, 31.7, 30.9, 30.7, 28.3, 27.8, 23.0, 18.8, 18.3; IR (neat) 3078, 2936, 2861, 1716, 1646, 1438, 1371, 1279, 1224, 1202, 1134, 1089, 1040, 981, 914, 861 cm<sup>-1</sup>; HRMS (ESI) calcd for C<sub>19</sub>H<sub>30</sub>O<sub>4</sub>Na [M + Na]<sup>+</sup> 345.2042, found 345.2007.

**Preparation of Re<sub>2</sub>O<sub>7</sub> supported on SiO<sub>2</sub>**

A slurry of 1.8 g of SiO<sub>2</sub> and 200mg of Re<sub>2</sub>O<sub>7</sub> in Et<sub>2</sub>O was stirred at room temperature for 3 hours, followed by removal of Et<sub>2</sub>O under reduced pressure, the obtained powder was dried under vacuum overnight. The catalyst was stored in dessicator and shielded from light.

**Representative cyclization with Re<sub>2</sub>O<sub>7</sub> supported on SiO<sub>2</sub>**

The general rearrangement procedure was followed with **16** (25 mg, 0.059 mmol), 10% Re<sub>2</sub>O<sub>7</sub> on SiO<sub>2</sub> (14 mg, 0.003 mmol), and CH<sub>2</sub>Cl<sub>2</sub> (12.0 mL). The reaction was stirred at -25 °C for 8 h (starting material was consumed) and then at rt for 10 h. The reaction was quenched with five drops of pyridine. After evaporation

of the solvent, the crude mixture was purified by flash chromatography (2%-5% ethyl acetate in hexanes) to provide **17** (11.5 mg, 60%, dr = 5:2).

7.364  
7.359  
7.339  
7.317  
7.291  
7.282  
7.273  
7.262  
7.248  
5.720  
5.702  
5.688  
5.651  
5.640  
5.624  
5.588  
5.573  
4.089  
4.076  
2.974  
2.964  
2.956  
2.946  
2.940  
2.934  
2.922  
2.903  
2.851  
2.827  
2.815  
2.799  
2.788  
2.781  
2.776  
2.770  
2.110  
2.091  
2.087  
2.074  
1.827  
1.624  
1.612  
1.598  
1.585  
1.577  
1.569  
1.562  
1.556  
1.547  
1.542  
1.523  
1.506  
1.502  
1.492  
1.482

300 1H CDCl3 Reduction 042712

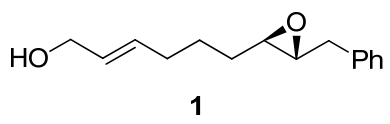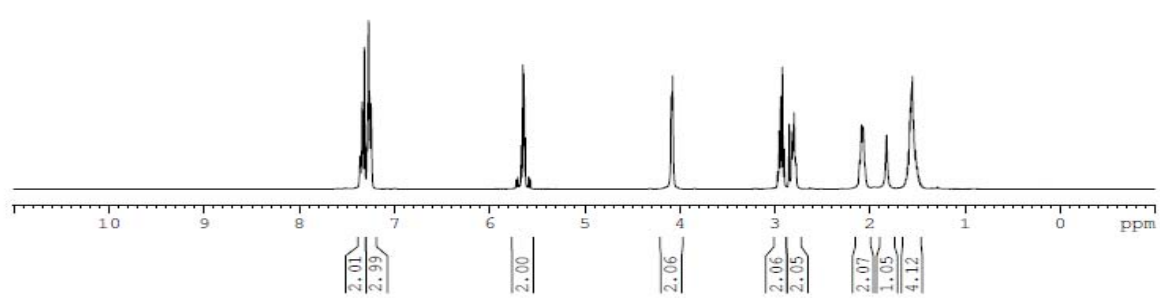

137.41  
132.20  
129.20  
128.62  
128.55  
126.61

63.54  
59.82  
58.63

38.51  
31.81  
31.30  
25.45

400A 1H CDCl3 Reduction 042712

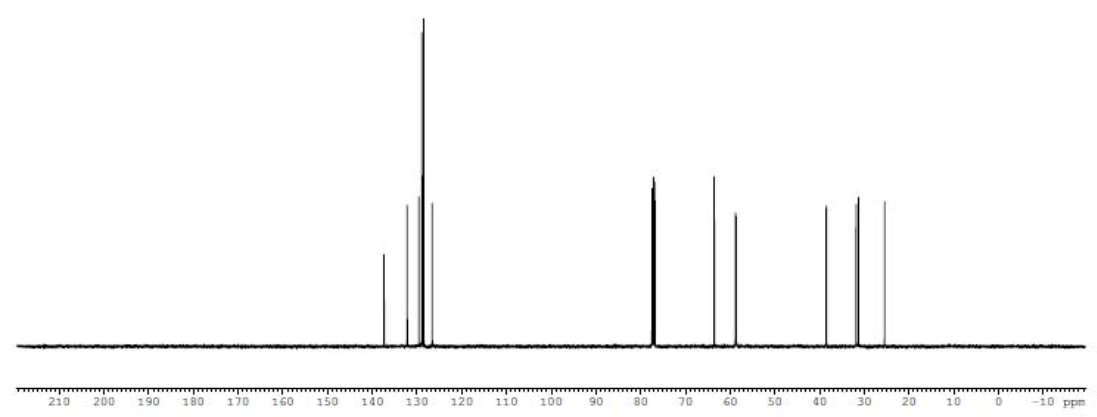

7.344  
7.342  
7.322  
7.321  
7.310  
7.304  
7.271  
7.270  
7.264  
7.260  
7.255  
7.241  
7.240  
5.901  
5.894  
5.891  
5.891  
5.875  
5.866  
5.851  
5.851  
5.281  
5.277  
5.244  
5.238  
5.234  
5.131  
5.121  
5.112  
5.104  
5.101  
5.097  
3.958  
3.947  
3.937  
3.921  
3.361  
3.344  
3.332  
2.881  
2.868  
2.821  
2.808  
2.044  
2.034  
1.938  
1.757  
1.721  
1.661  
1.661  
1.631  
1.631  
1.571  
1.541  
1.508

400B 1H CDCl3 Rear SPT #1 050212

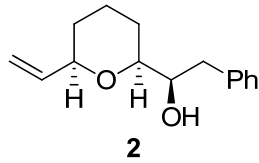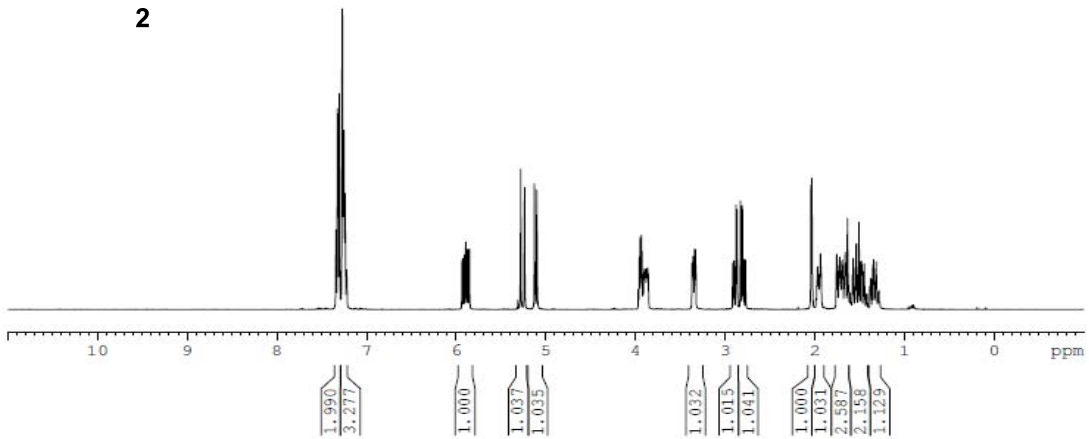

138.35  
138.48  
128.39  
128.57  
126.53  
114.37  
79.45  
78.37  
74.65  
38.74  
31.55  
35.09  
33.00

400A 13C CDCl3 Rear SPT #1-1 0502

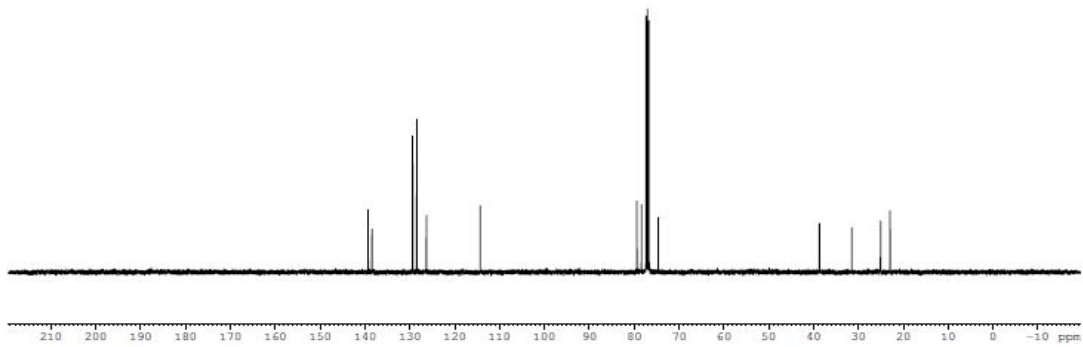

400B 1HCOSY CDC13 Rear SPT #1 050212

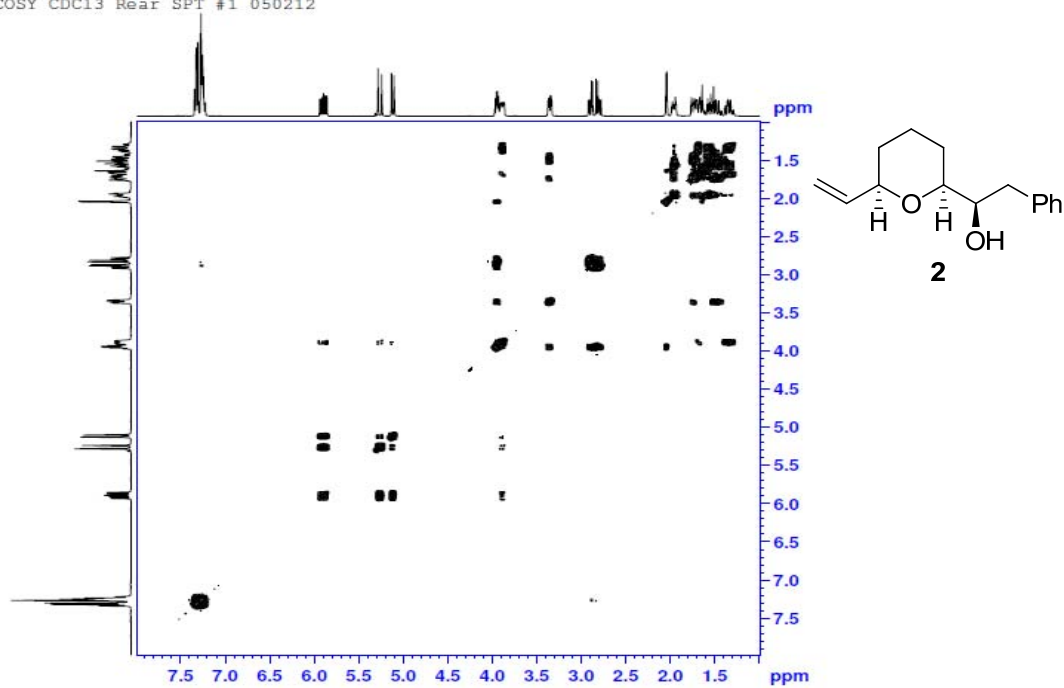

400B 1HNOESY CDC13 Rear SPT #1 050212

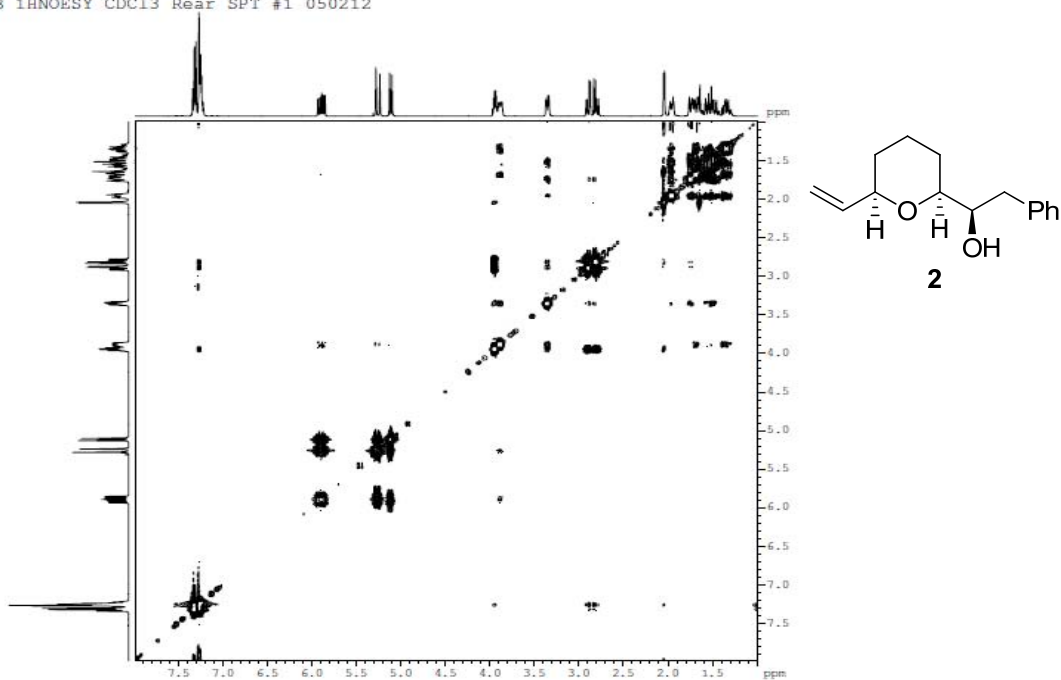

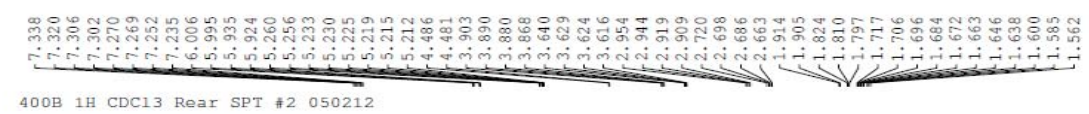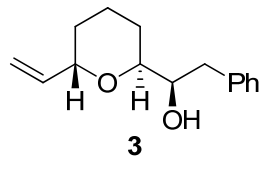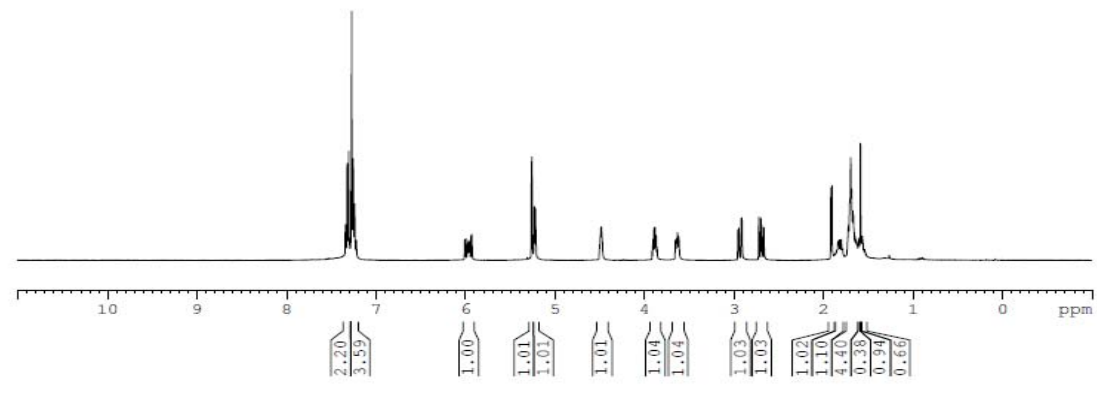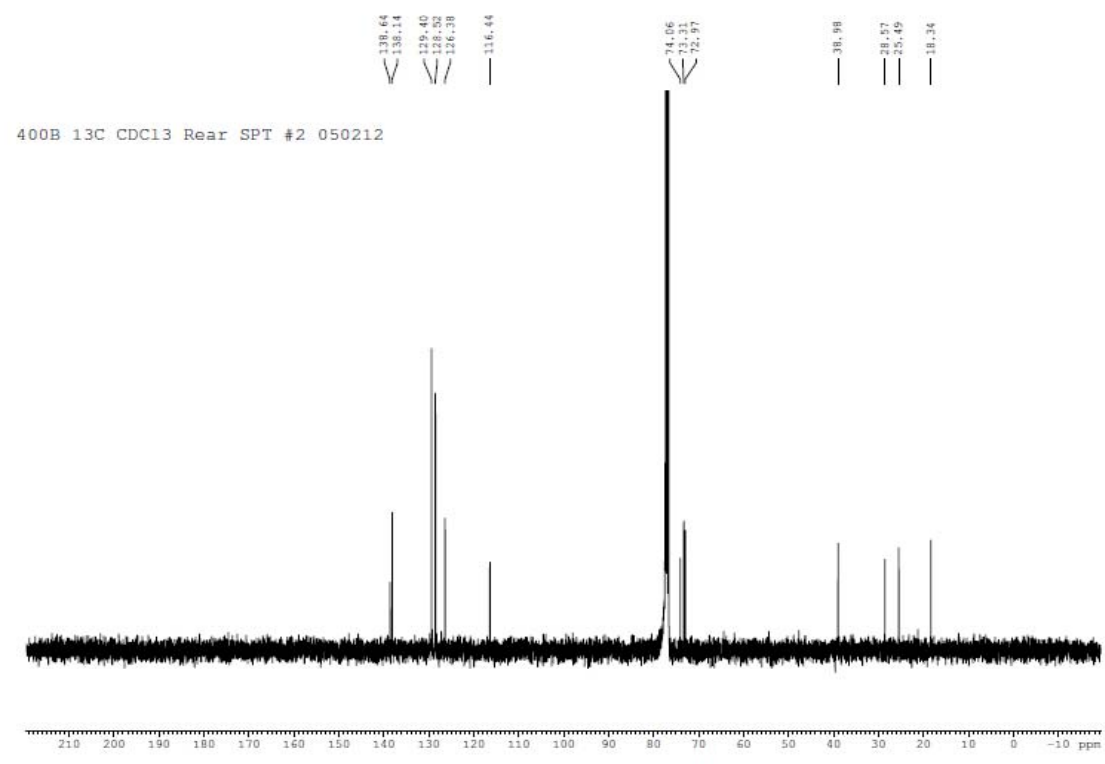

400B 1HCOSY CDC13 Rear SPT #2 050212

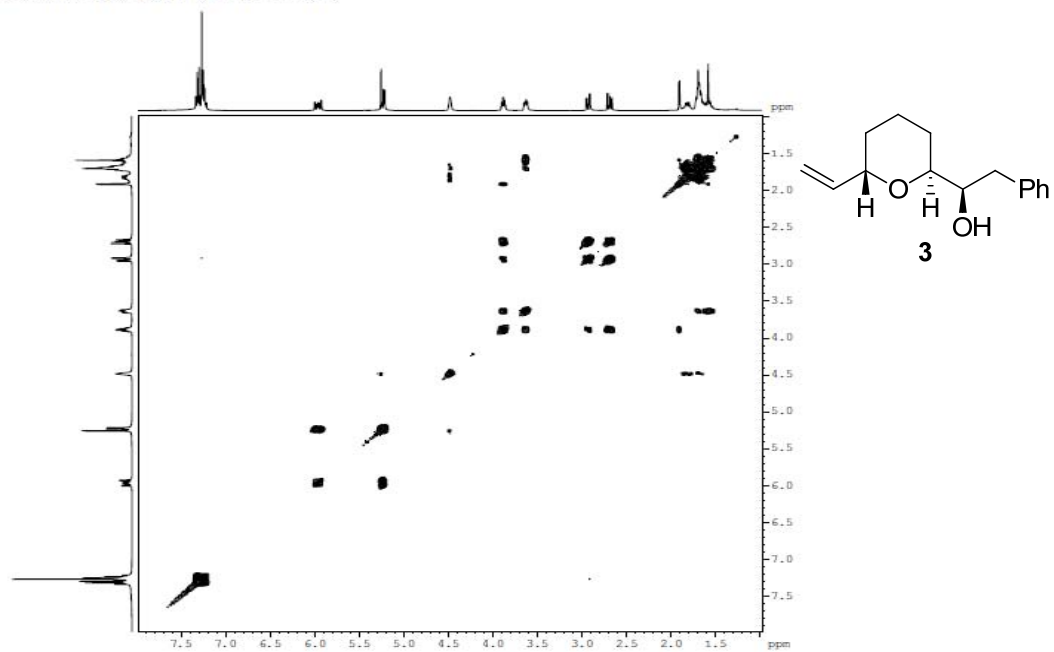

400B 1HNOESY CDC13 Rear SPT #2 050212

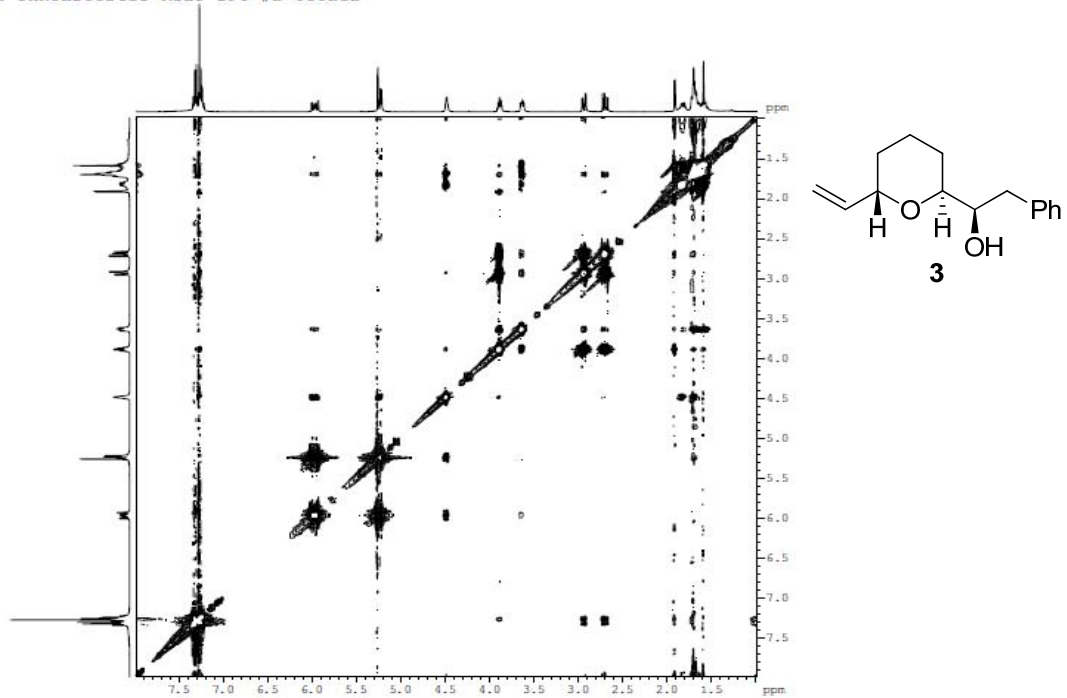



300 1H CDC13 Reduction 032212

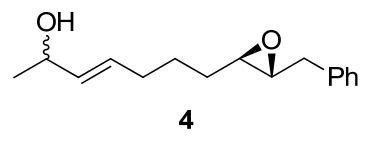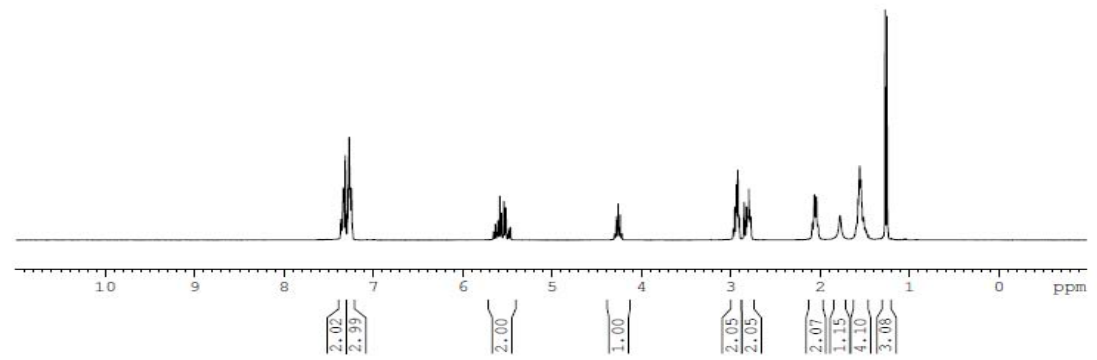

300 13C CDC13 Reduction 032212

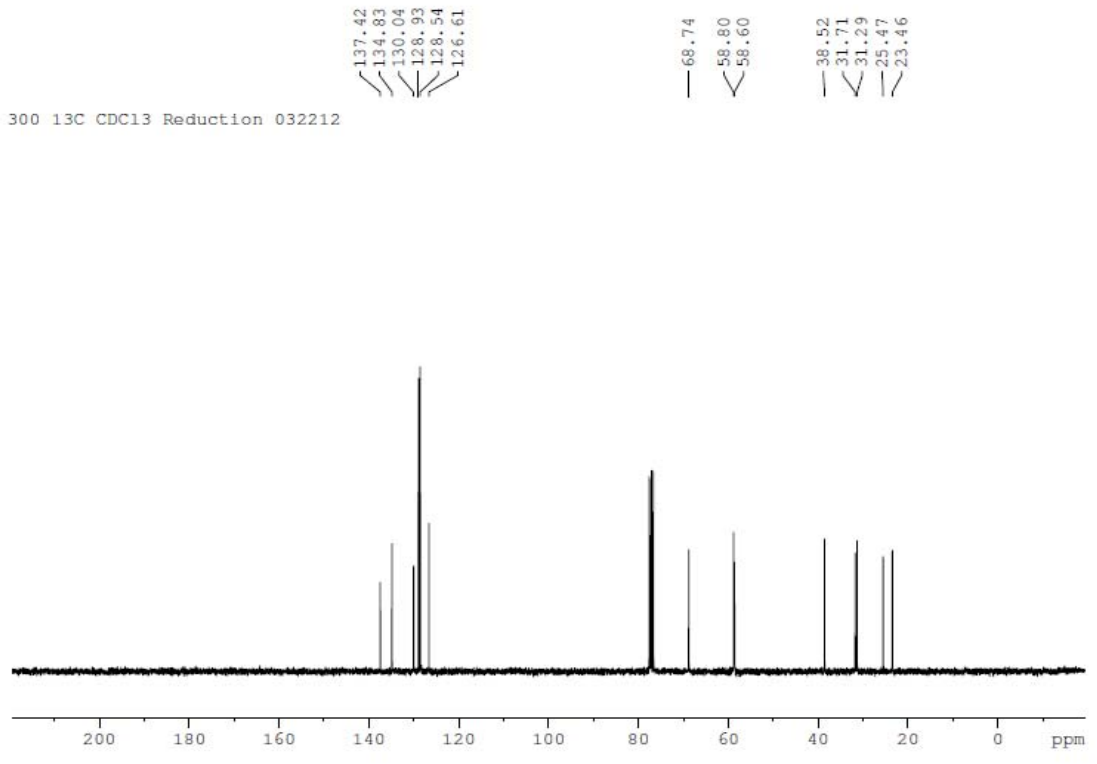

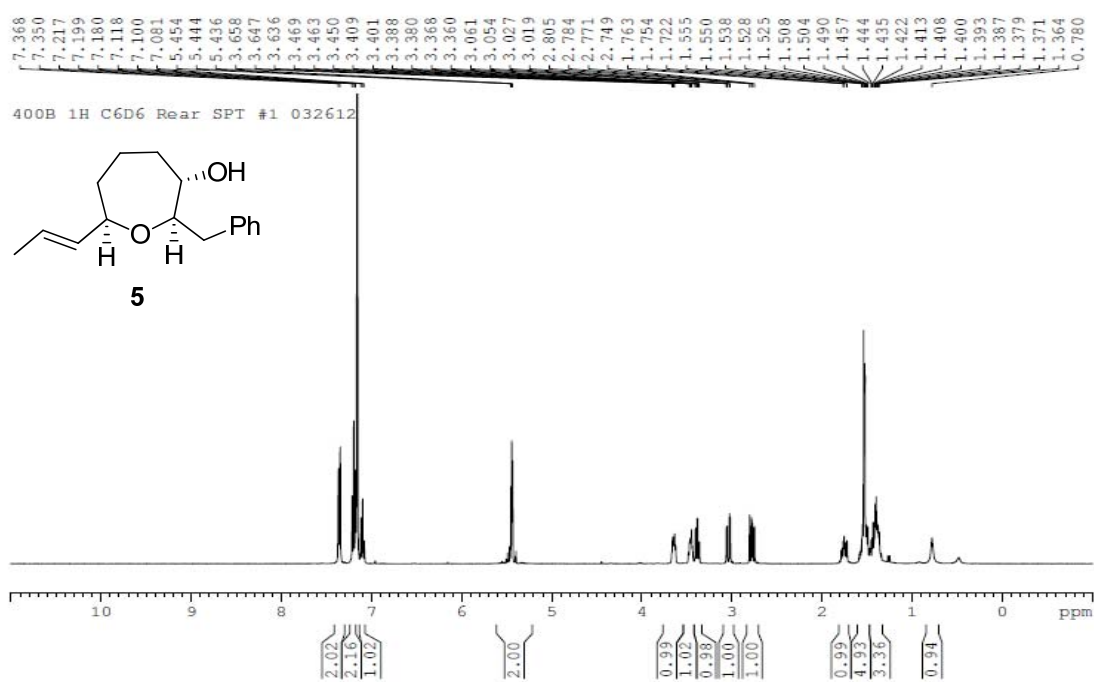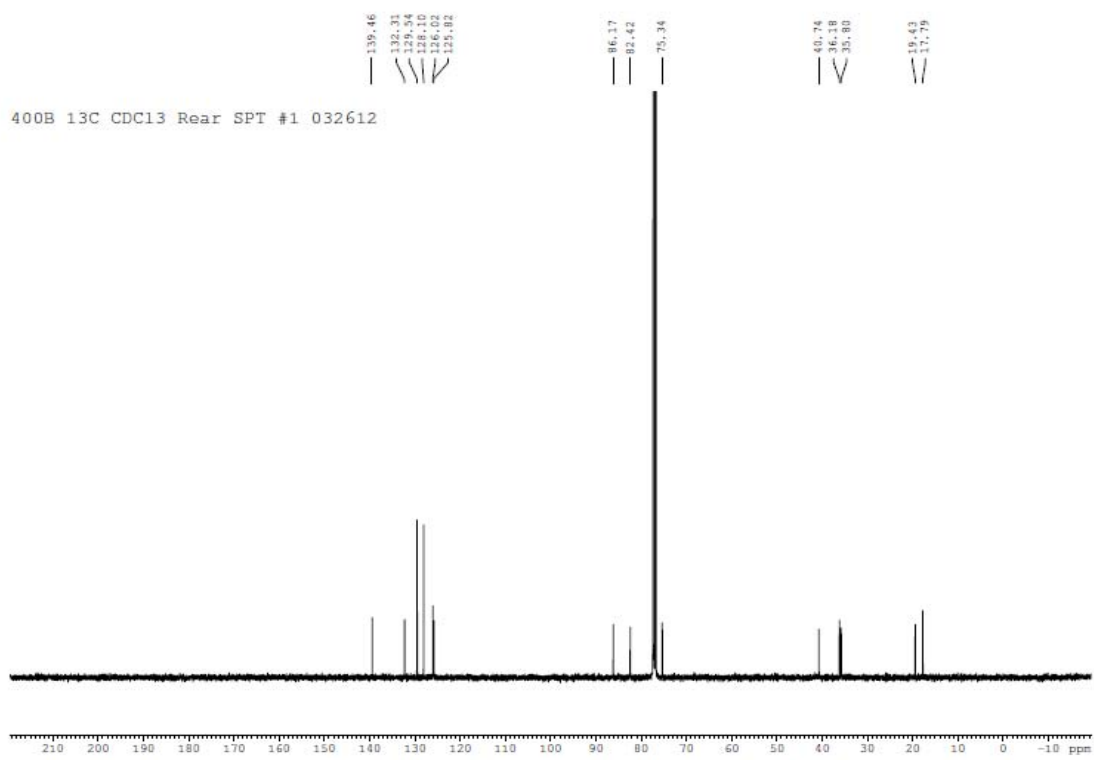

400B 1HCOSY C6D6 Rear SPT #1 032612

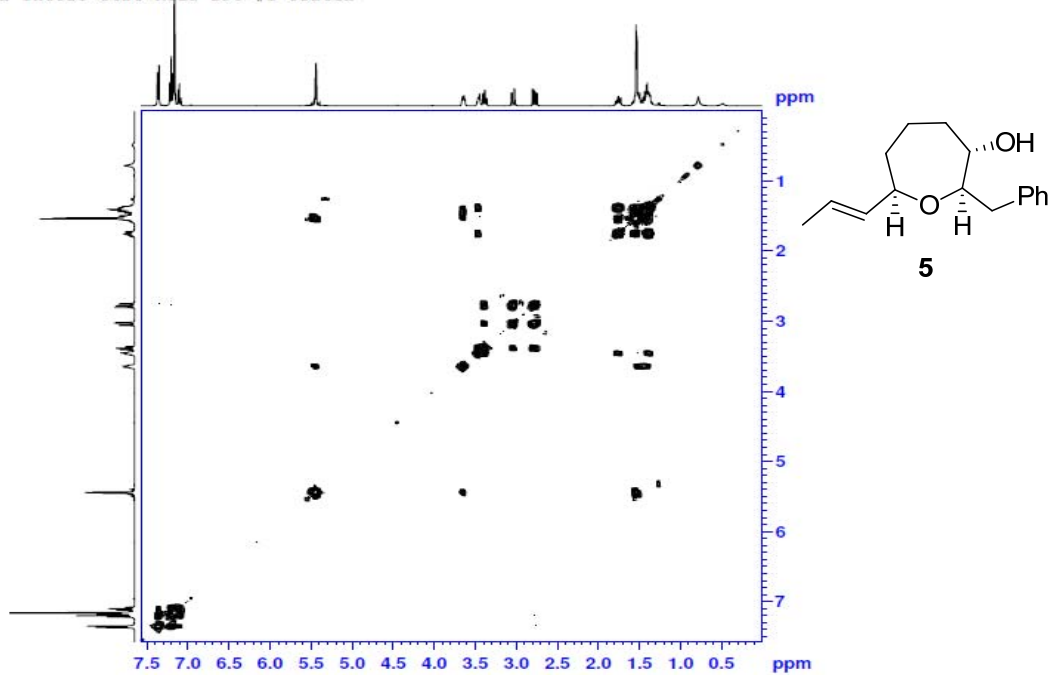

400B 1HNOESY C6D6 REAR SPT #1 022612

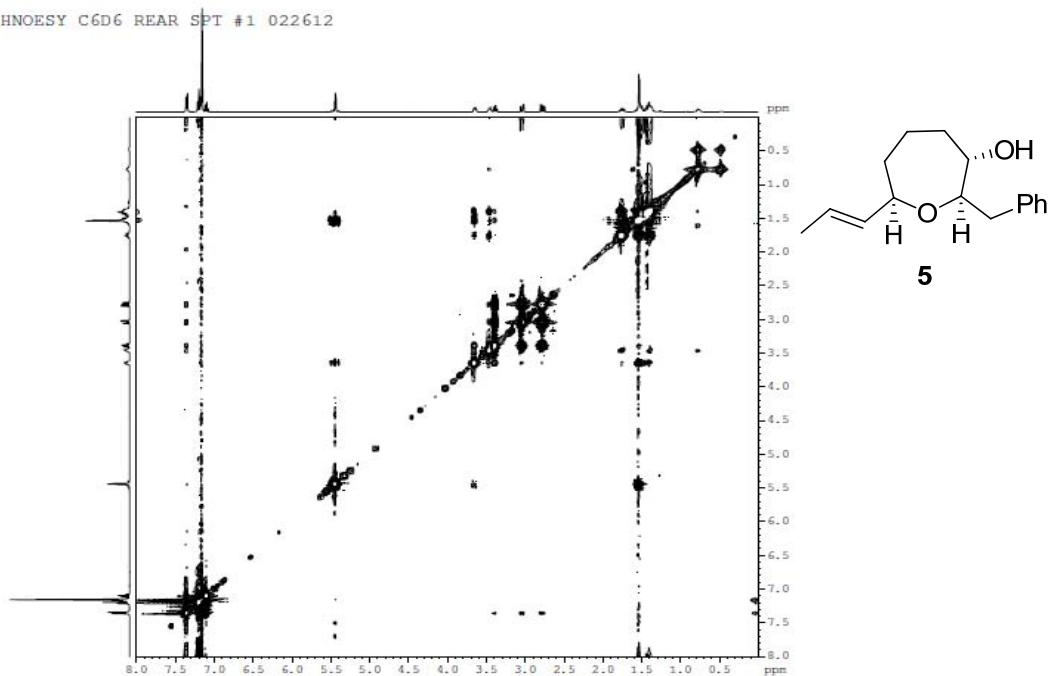

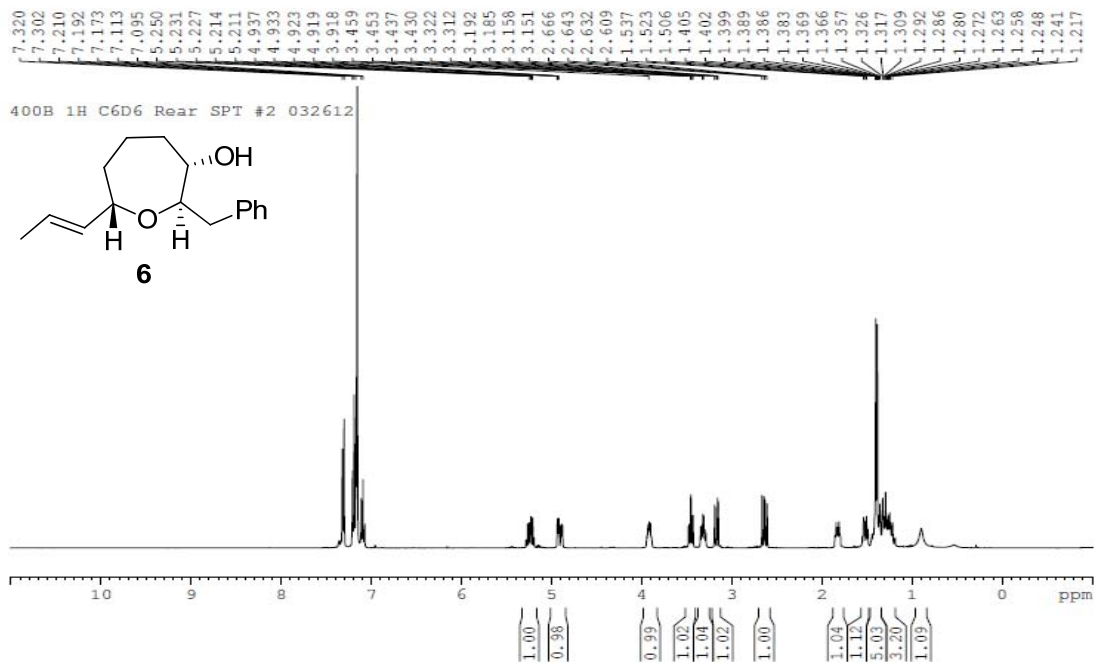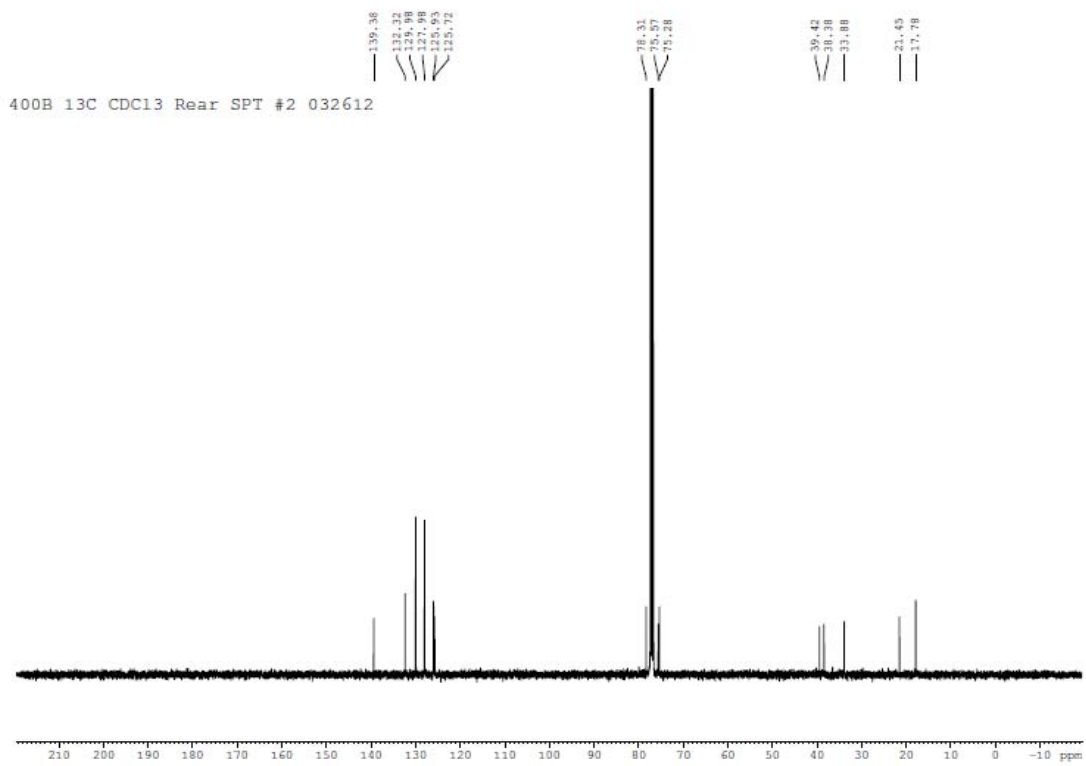

400B 1HCOSY C6D6 Rear SPT #2 032612

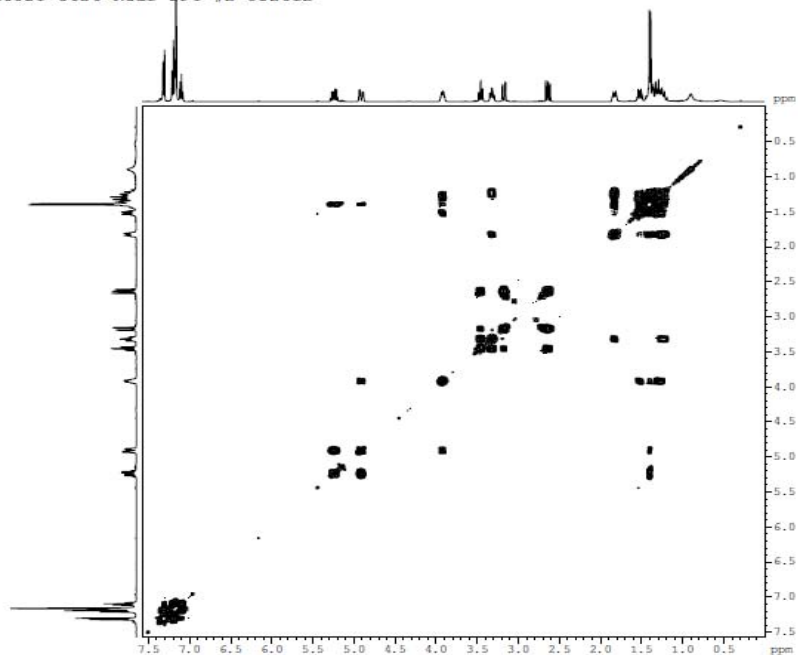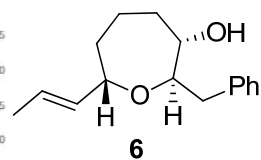

400B 1HNOESY C6D6 Rear SPT #2-2 032612

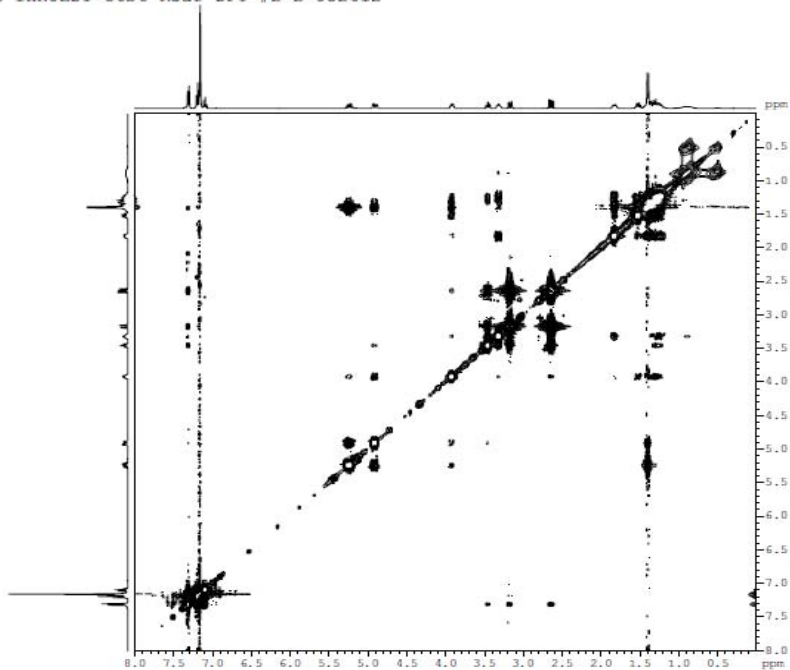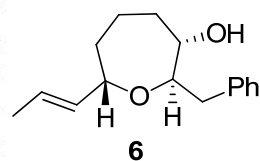

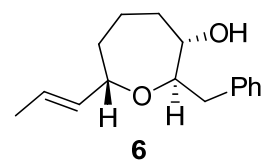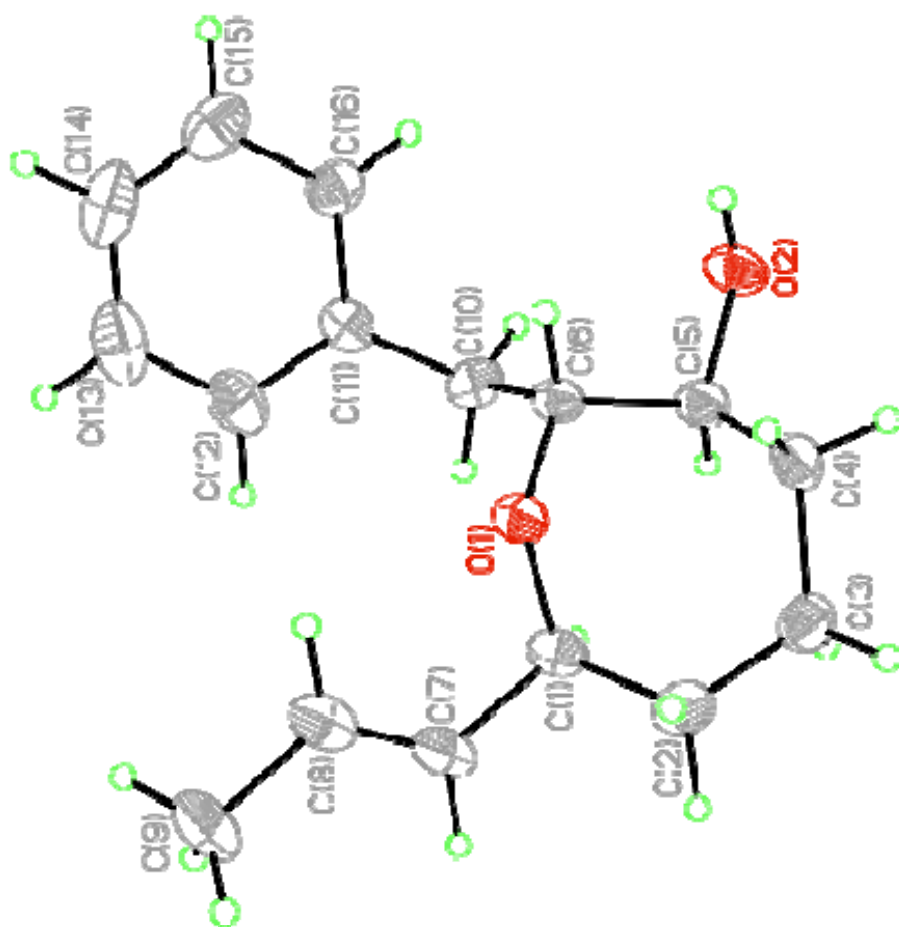

7.353  
7.351  
7.334  
7.332  
7.319  
7.315  
7.292  
7.290  
7.278  
7.270  
7.260  
7.250  
5.731  
5.708  
5.692  
5.690  
5.574  
5.572  
5.571  
5.559  
5.557  
5.556  
3.965  
3.954  
3.354  
3.338  
3.333  
3.327  
2.872  
2.859  
2.837  
2.817  
2.803  
2.037  
2.029  
2.021  
1.931  
1.741  
1.739  
1.727  
1.725  
1.723  
1.658  
1.654  
1.626  
1.621  
1.611  
1.562  
1.530  
1.511  
1.491  
1.486  
1.358  
1.329

400B 1H Rear SPT #3 032412

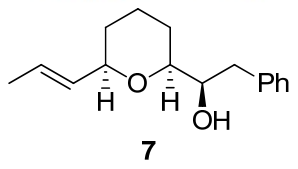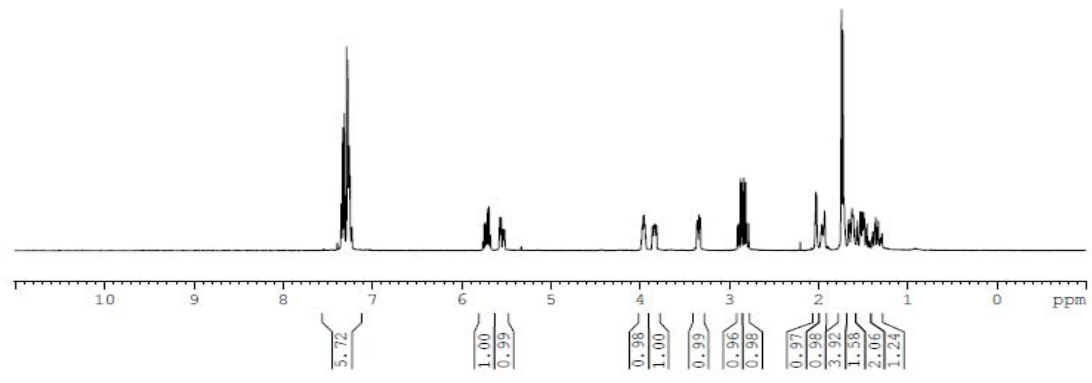

138.49  
132.43  
128.48  
128.41  
126.51  
126.32  
79.42  
76.47  
74.61  
39.71  
31.85  
24.89  
23.03  
17.88

400B 13C Rear SPT #3 032412

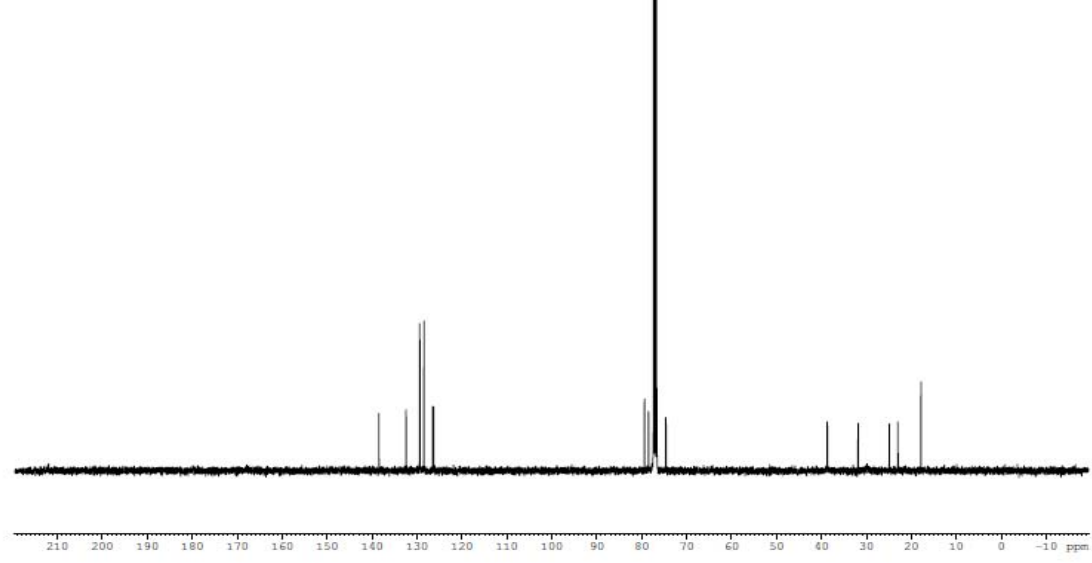

400B 1HCOSY Rear SPT #3 032412

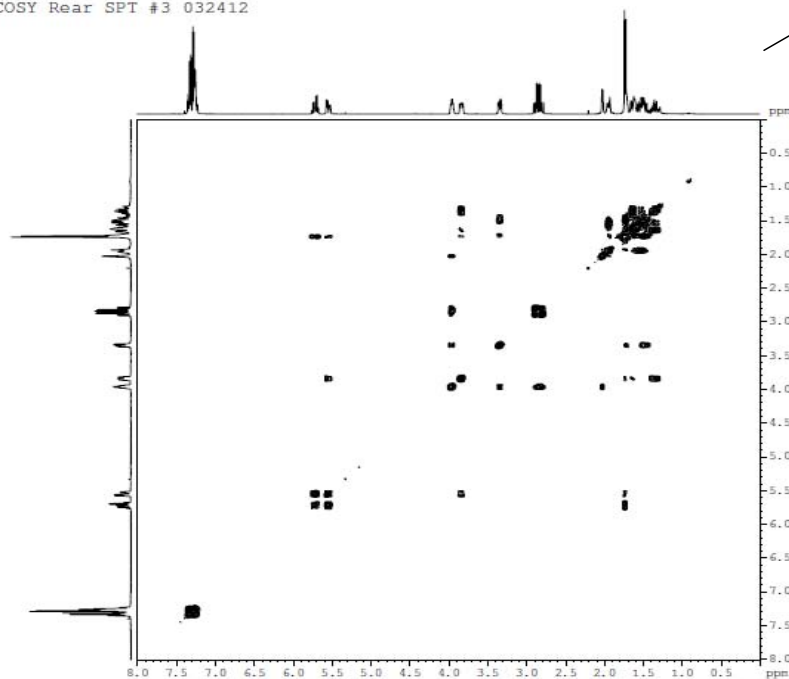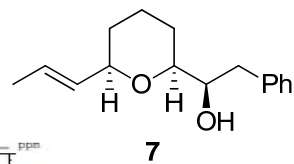

400B 1HNOESY CDC13 Rear SPT #3-2 032412

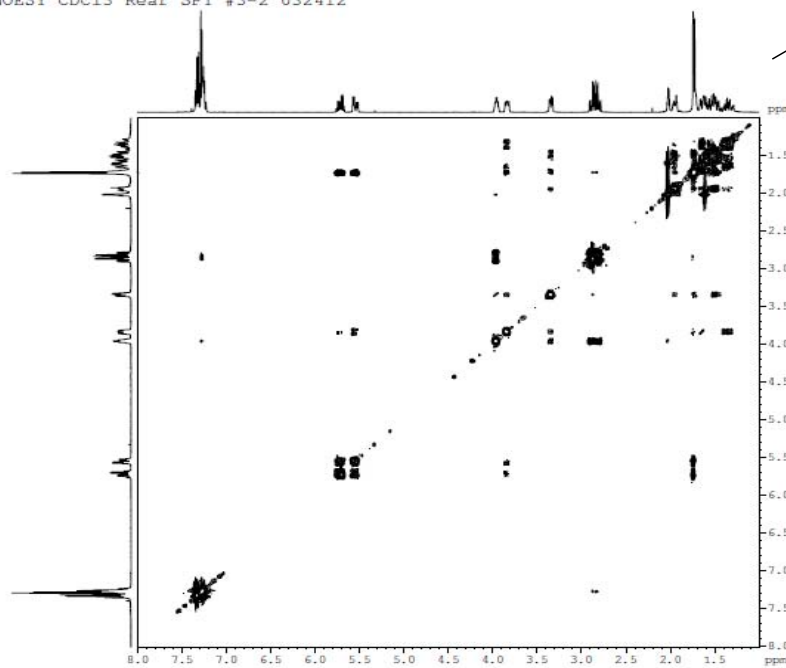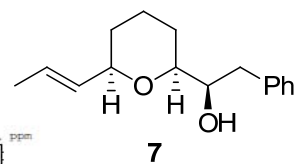



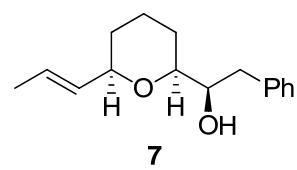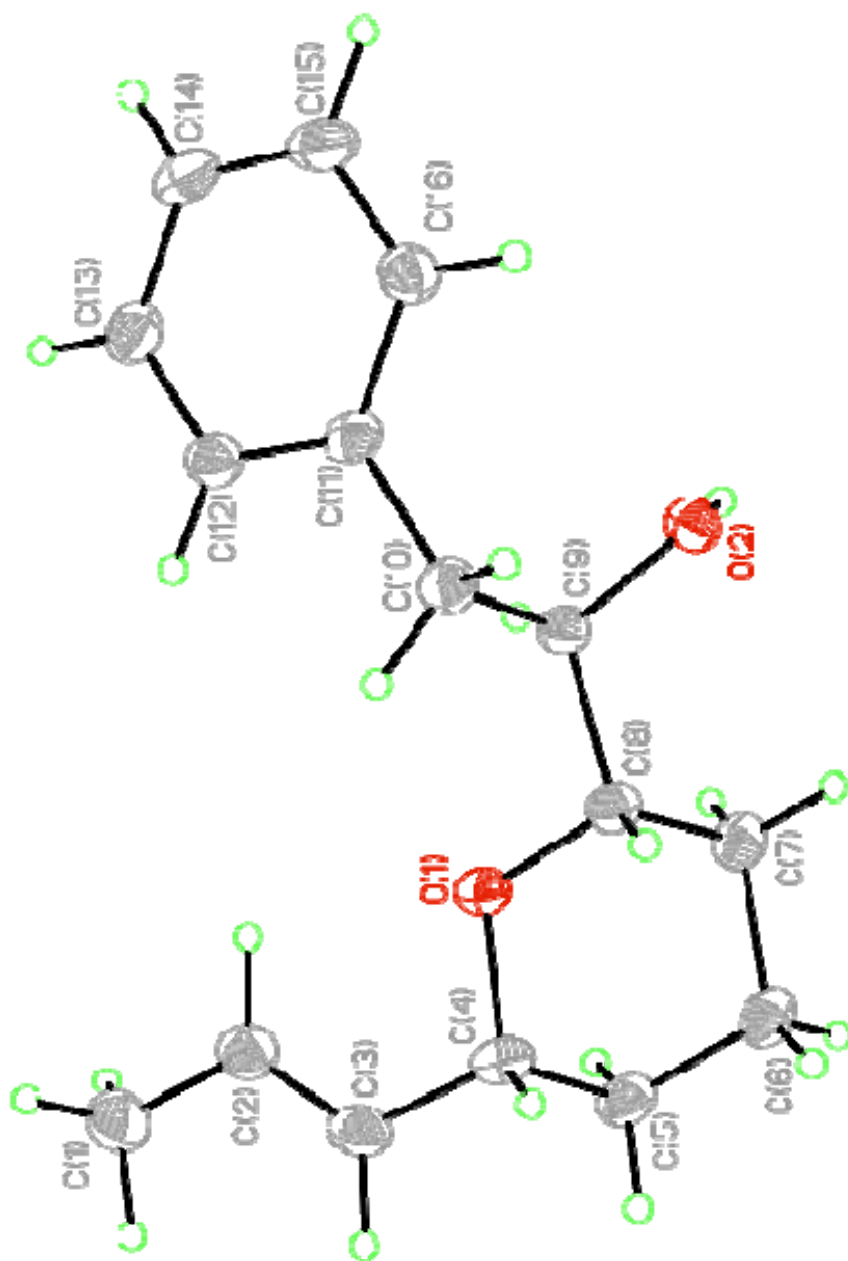

7.359  
7.341  
7.327  
7.323  
7.293  
7.277  
7.256  
5.712  
5.699  
5.693  
5.688  
5.683  
4.433  
4.426  
4.422  
4.414  
3.917  
3.906  
3.896  
3.896  
3.660  
3.660  
3.643  
3.636  
3.629  
3.629  
2.969  
2.960  
2.934  
2.925  
2.925  
2.744  
2.721  
2.721  
2.709  
2.687  
1.927  
1.927  
1.804  
1.791  
1.791  
1.778  
1.765  
1.765  
1.756  
1.754  
1.739  
1.734  
1.734  
1.726  
1.717  
1.707  
1.701  
1.684  
1.678  
1.670  
1.651  
1.646  
1.622  
1.610  
1.604  
1.586

400B 1H CDC13 Rear SPT #4 032412

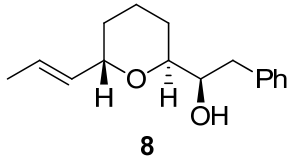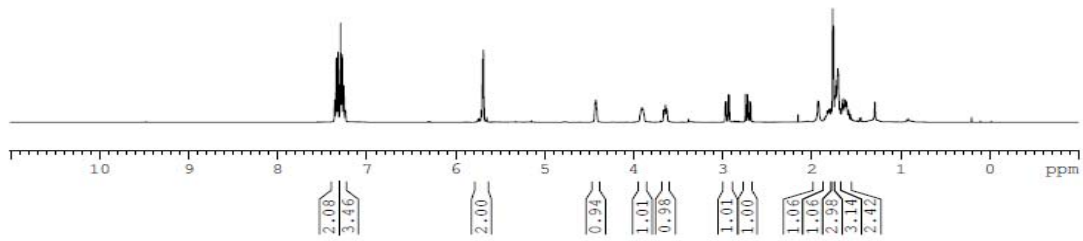

138.67  
130.66  
129.66  
128.90  
127.92  
126.36  
73.80  
73.17  
72.77  
38.98  
29.21  
25.48  
18.36  
18.04

400B 13C CDC13 Rear SPT #4 032412

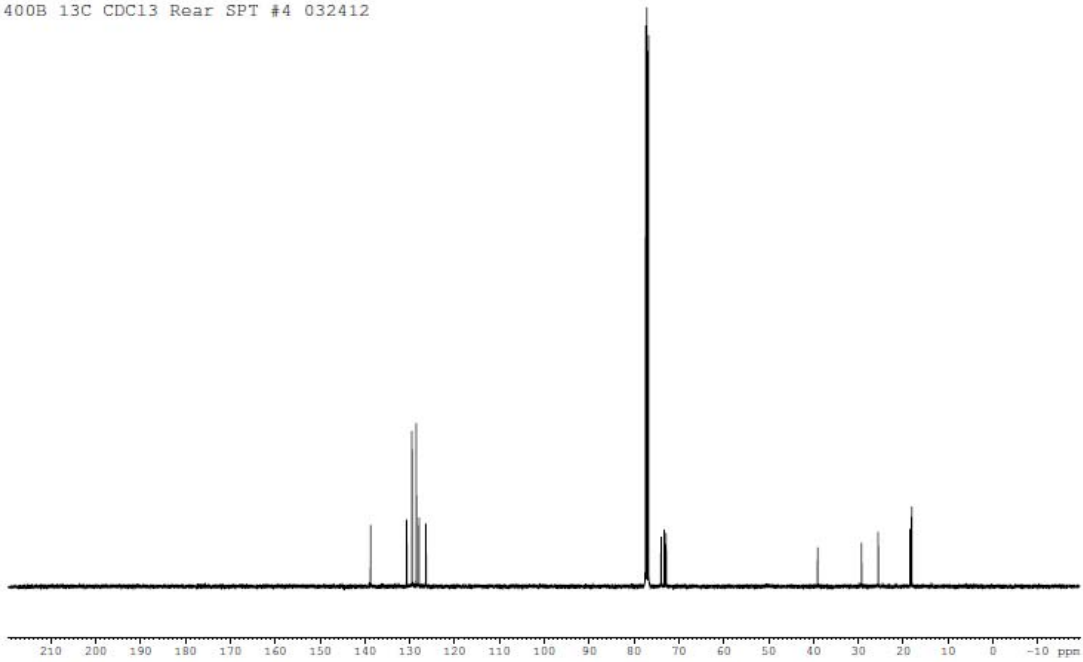

400B 1HCOSY CDC13 Rear SPT #4 032412

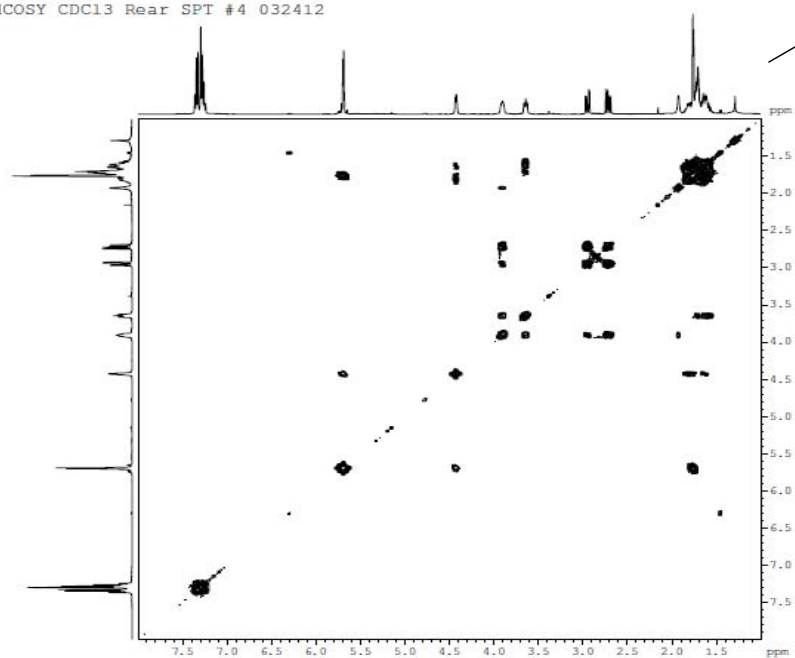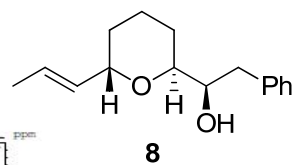

400B 1HNOESY CDC13 Rear SPT #4-2 032412

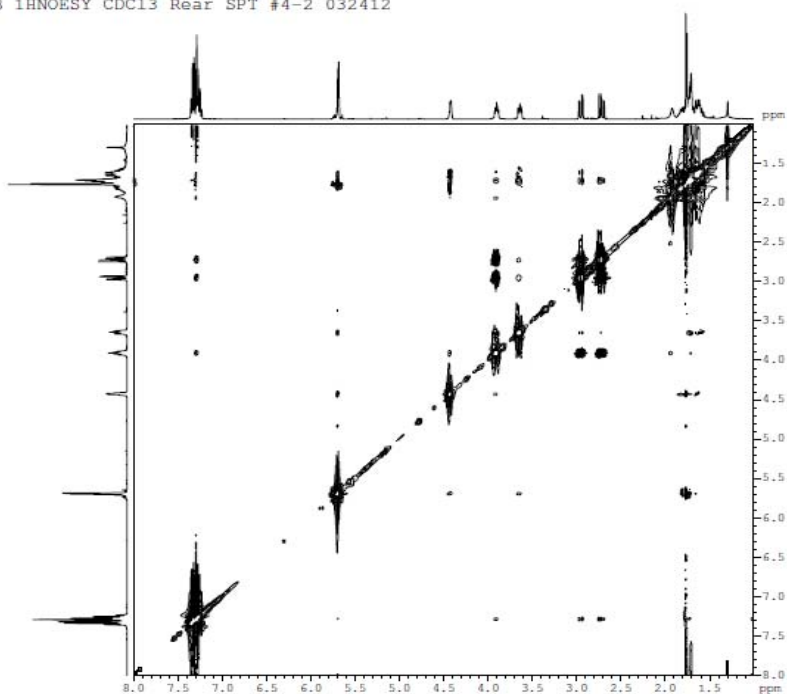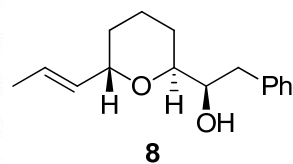

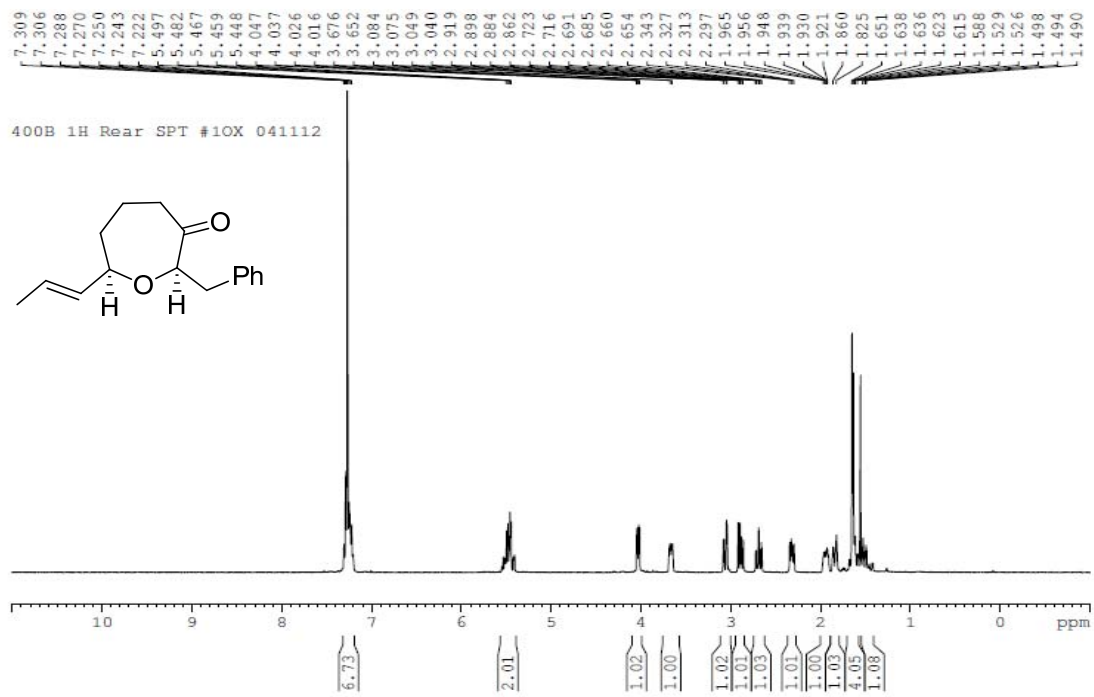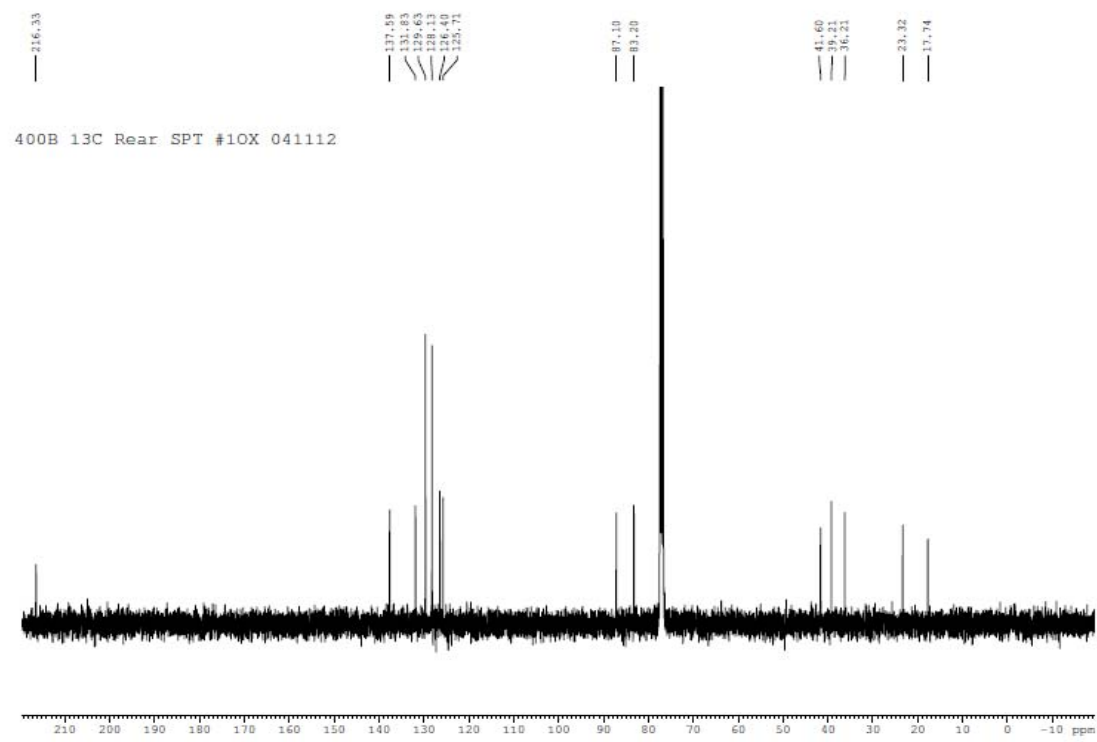

400B 1HCOSY Rear SPT #10X 041112

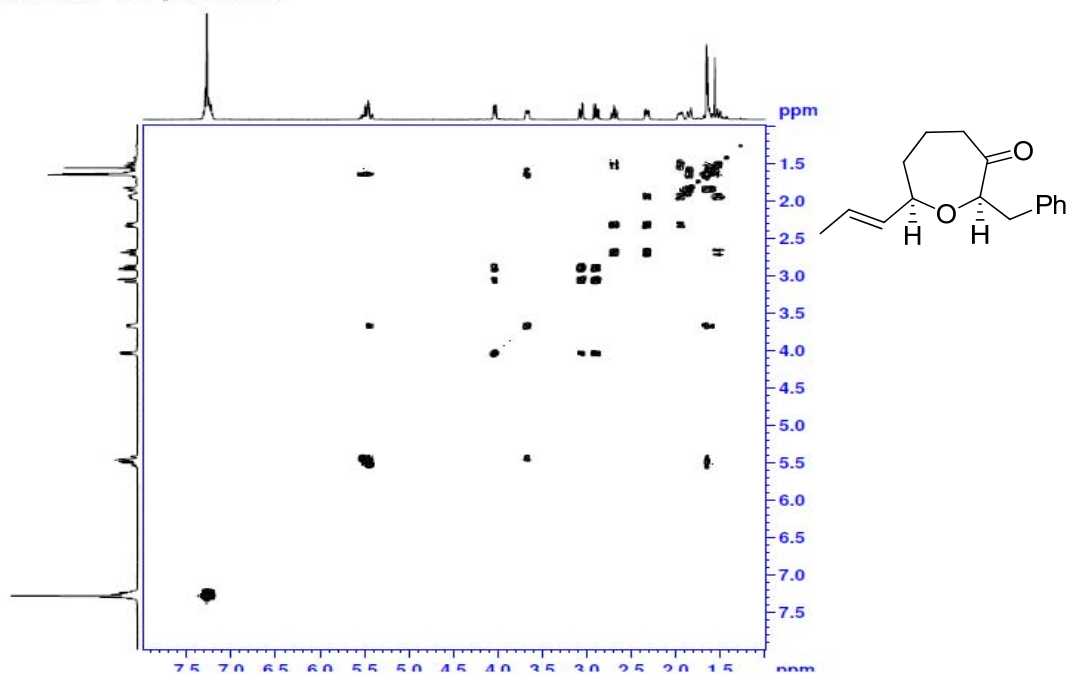

400B CDC13 1HNOESY Rear SPT #1 OX 041112-1

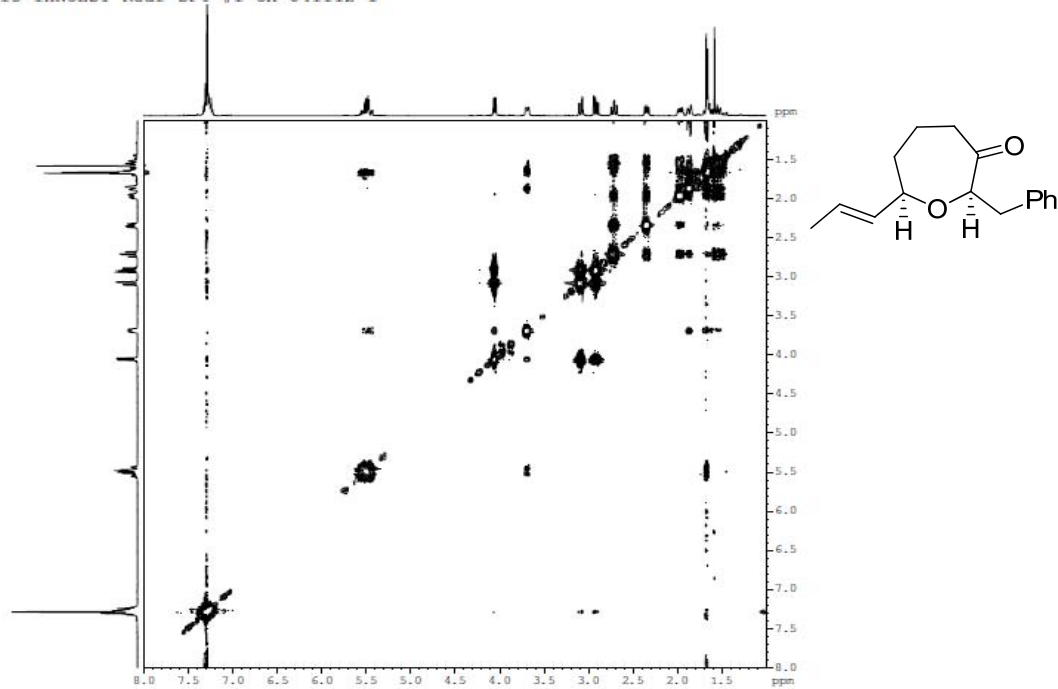

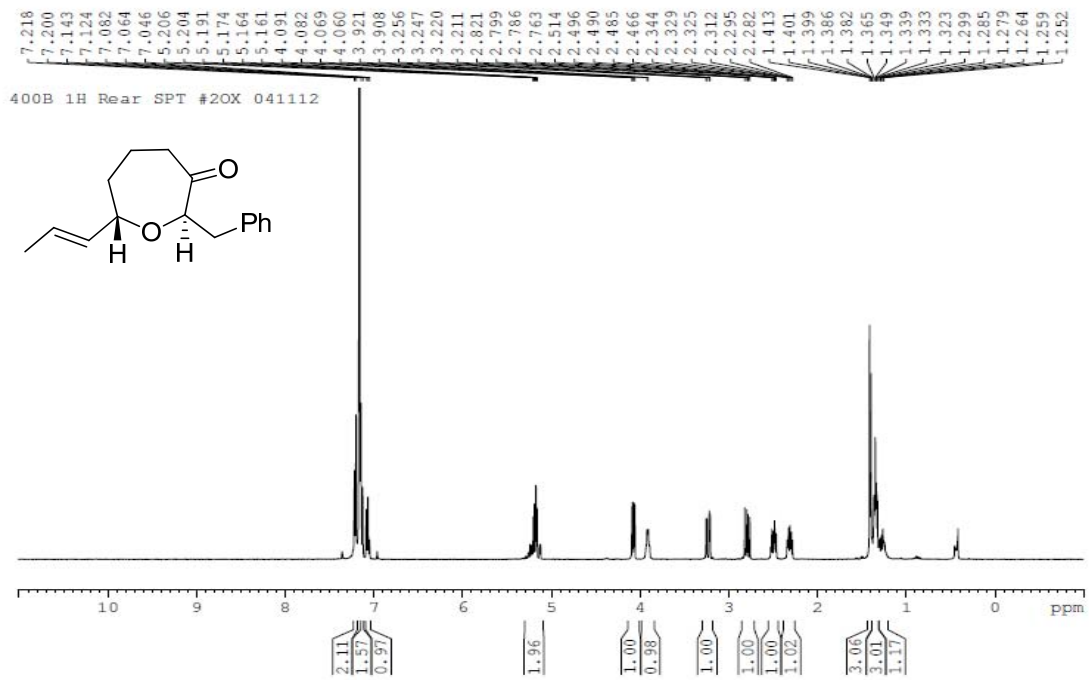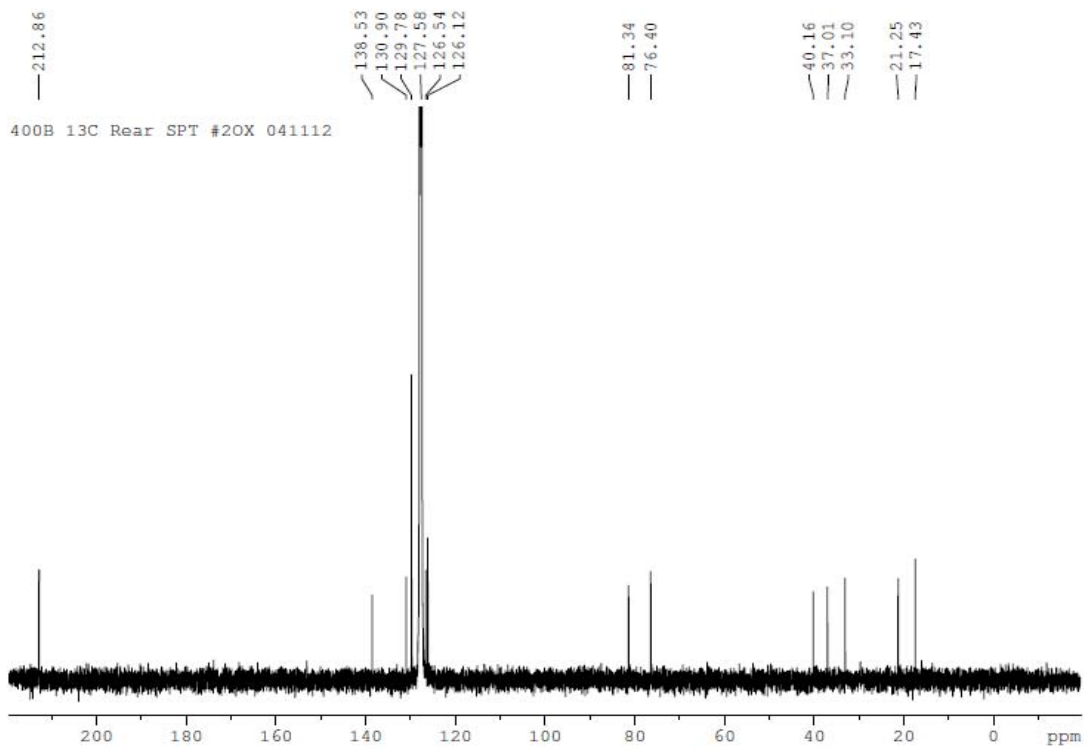

400B 1HCOSY Rear SPT #2OX 041112

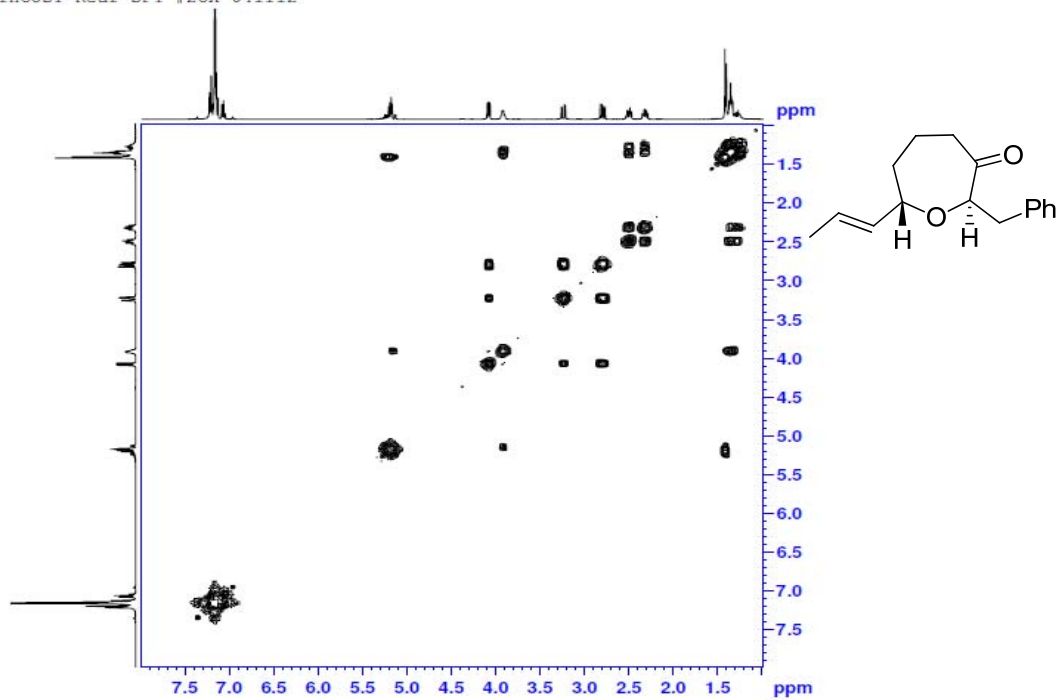

400B 1HNOESY C6D6 Rear SPT #2 OX 041112-1

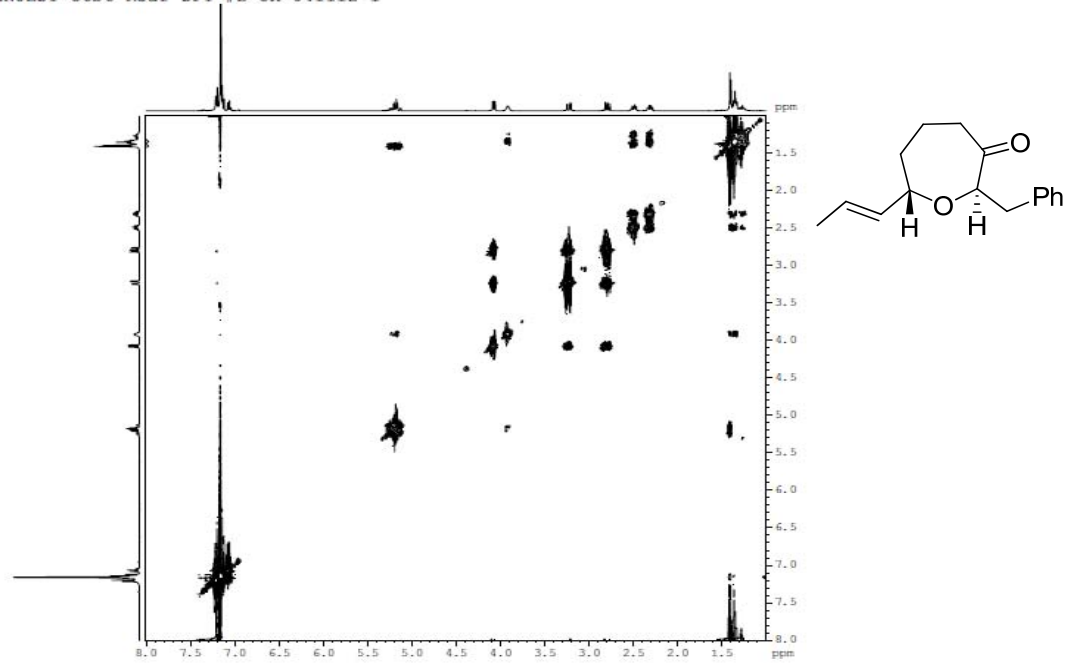

400B 1H-1 C6D6 Isomerization 051512

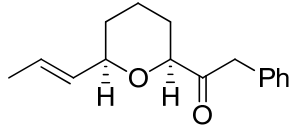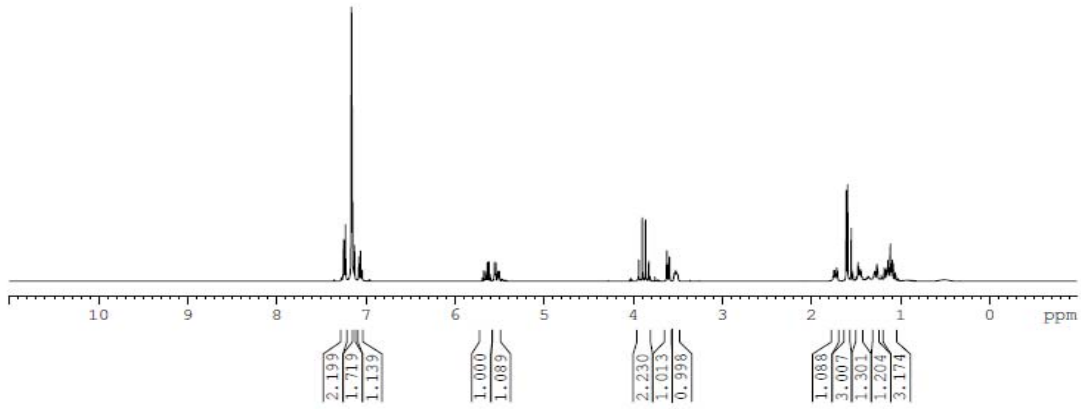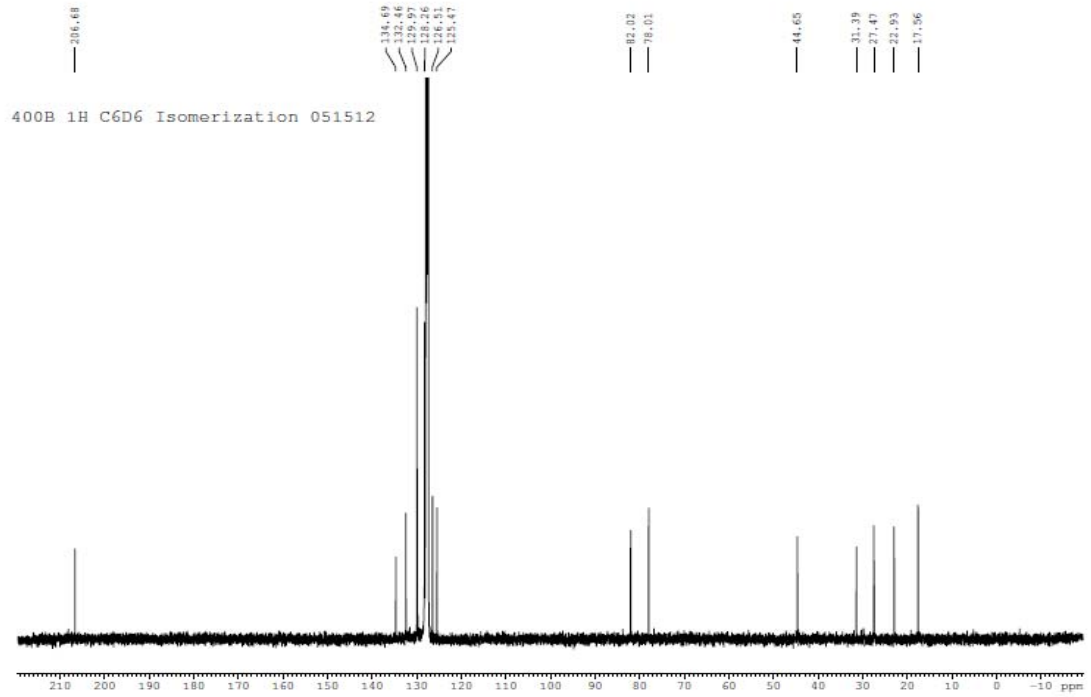



400B 1HCOSY C6D6 Isomerization 051512

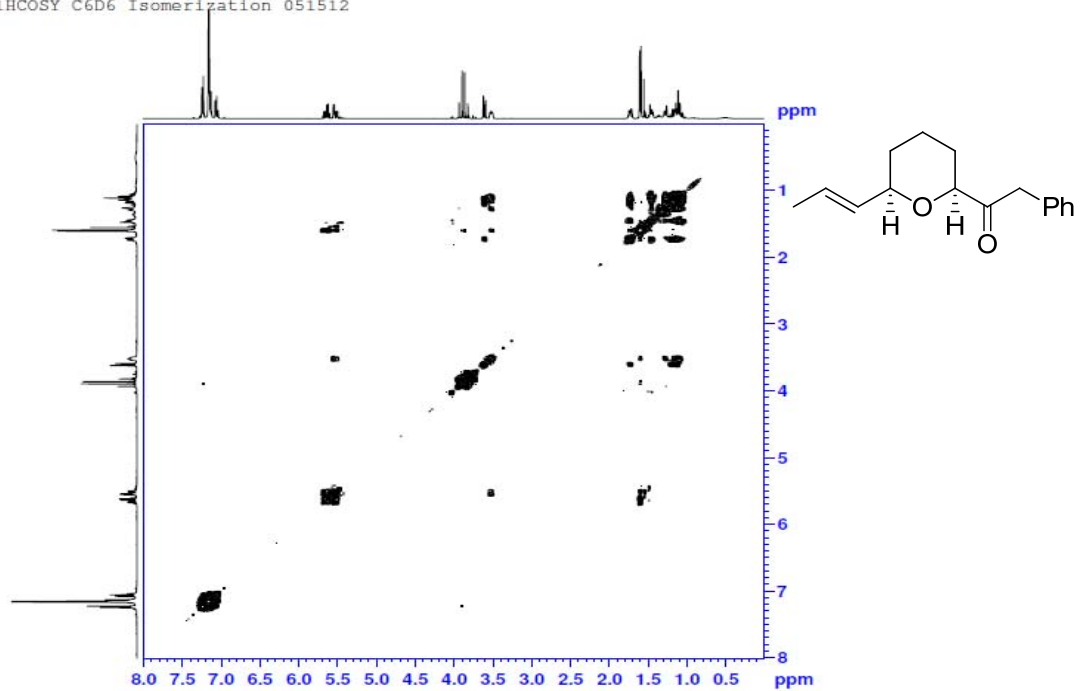

400B 1HNOESY C6D6 Isomerization 051512

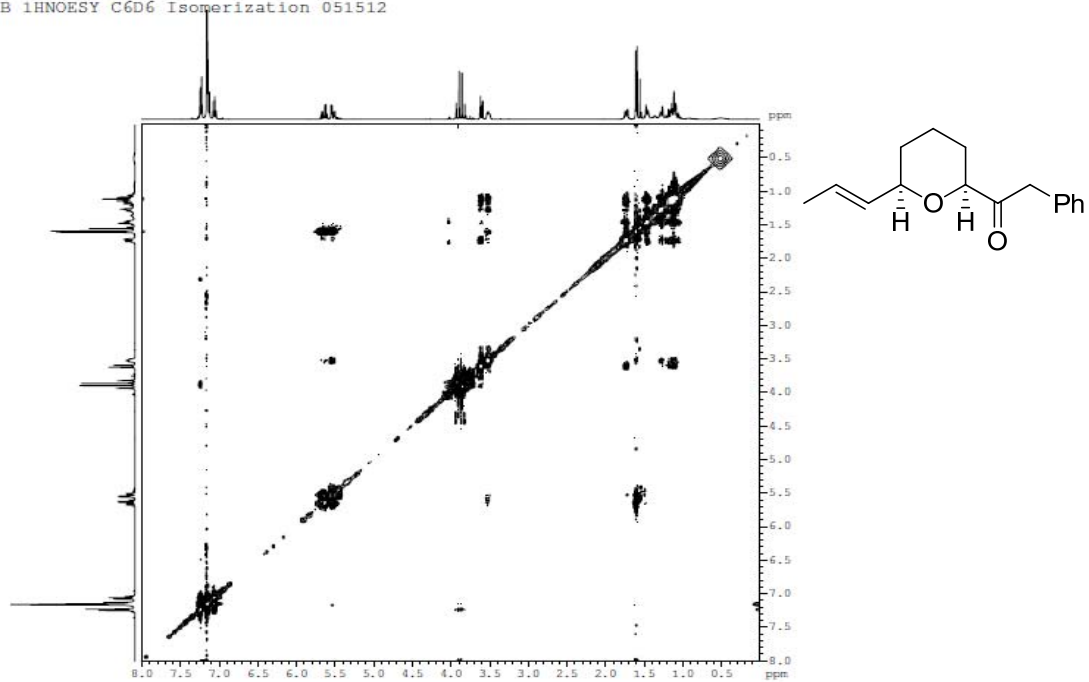

7.346  
7.343  
7.339  
7.336  
7.332  
7.321  
7.312  
7.307  
7.306  
7.297  
7.293  
7.237  
5.750  
5.750  
5.737  
5.731  
5.715  
5.728  
5.692  
5.696  
5.683  
5.680  
5.597  
5.584  
5.584  
5.576  
5.574  
5.570  
5.566  
5.565  
5.545  
5.541  
5.535  
5.531  
5.517  
5.517  
4.297  
4.285  
4.112  
4.112  
4.098  
4.098  
3.979  
3.979  
3.866  
3.828  
1.992  
1.891  
1.891  
1.877  
1.867  
1.864  
1.859  
1.859  
1.844  
1.844  
1.835  
1.835  
1.761  
1.751  
1.748  
1.748  
1.735  
1.735  
1.732  
1.729  
1.729  
1.716  
1.695  
1.695  
1.693  
1.681  
1.676  
1.669  
1.666  
1.646  
1.596  
1.580  
1.578  
1.567  
1.567  
1.555  
1.555  
1.546  
1.546  
1.528  
1.528  
1.507  
1.496

400B 1H CDC13 SPT 40X 041012

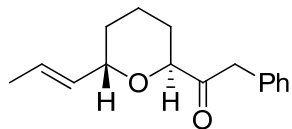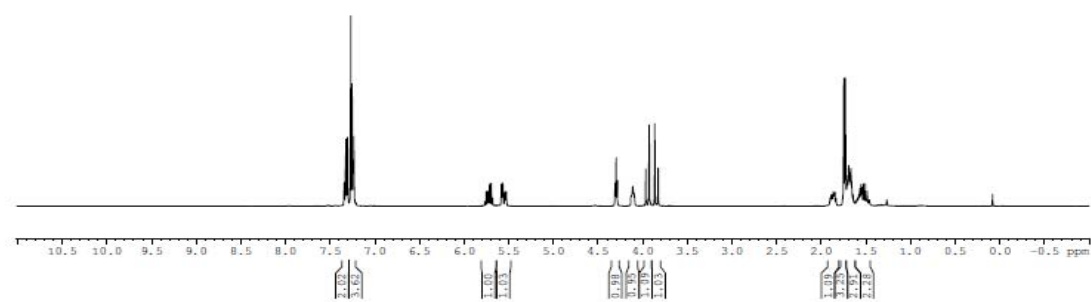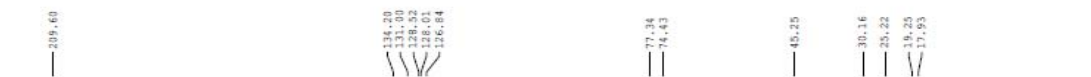

400B 13C CDC13 SPT 40X 041012

400B 1HCOSY CDC13 SPT 40X 041012

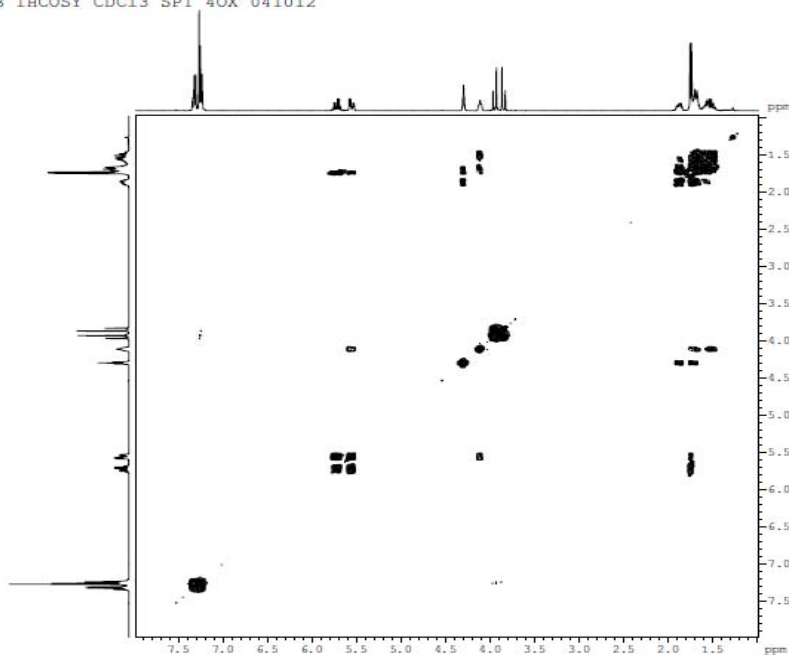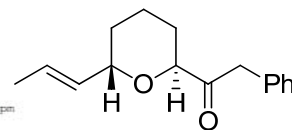

400B 1HNOESY CDC13 SPT#4 0X 041012-2

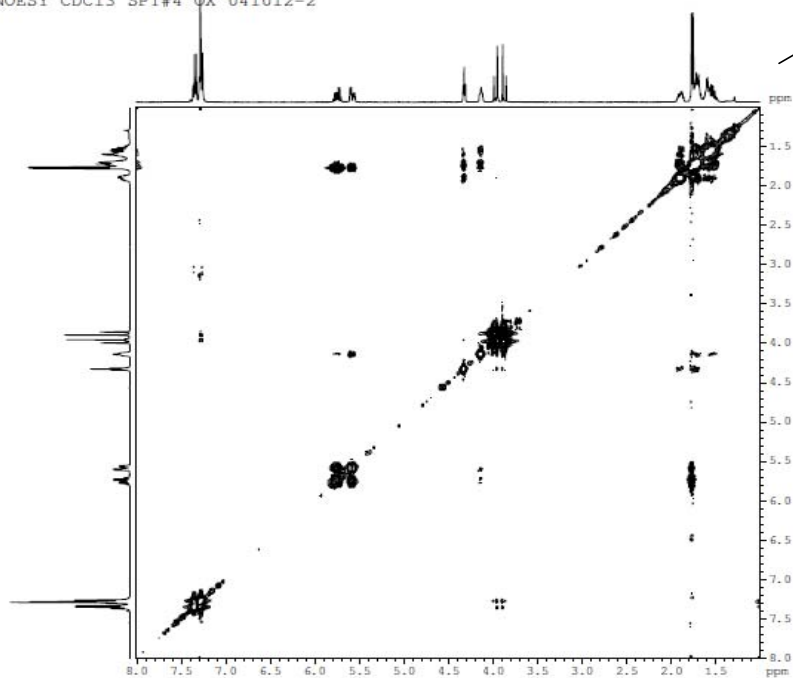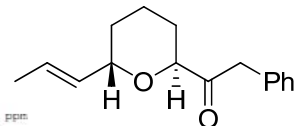

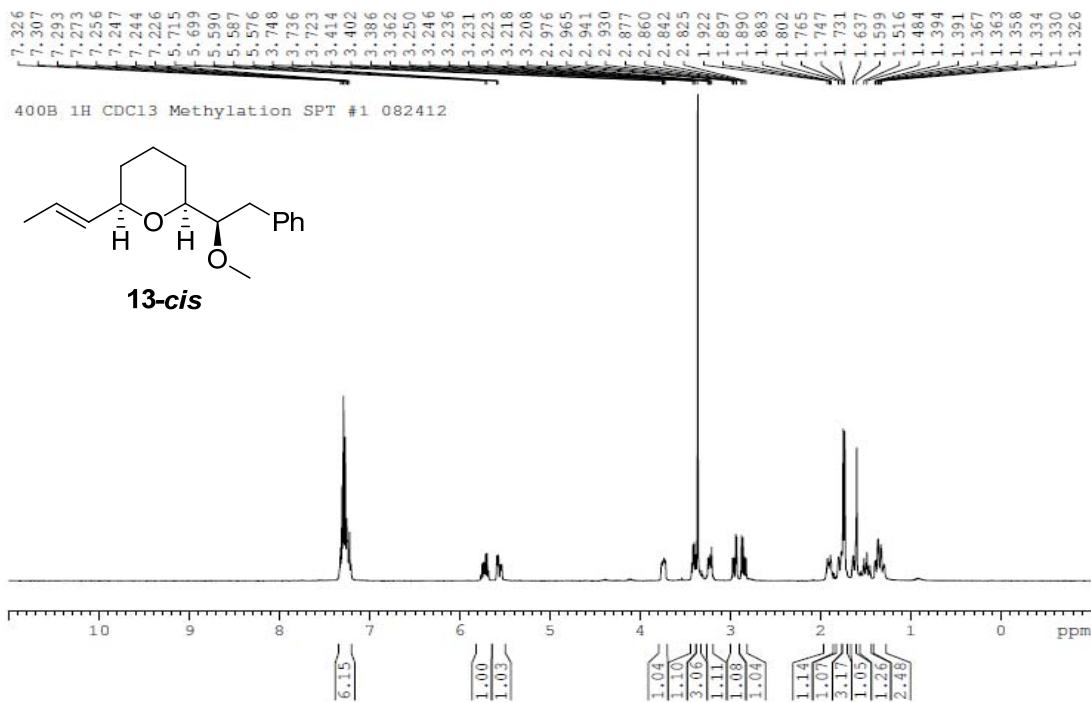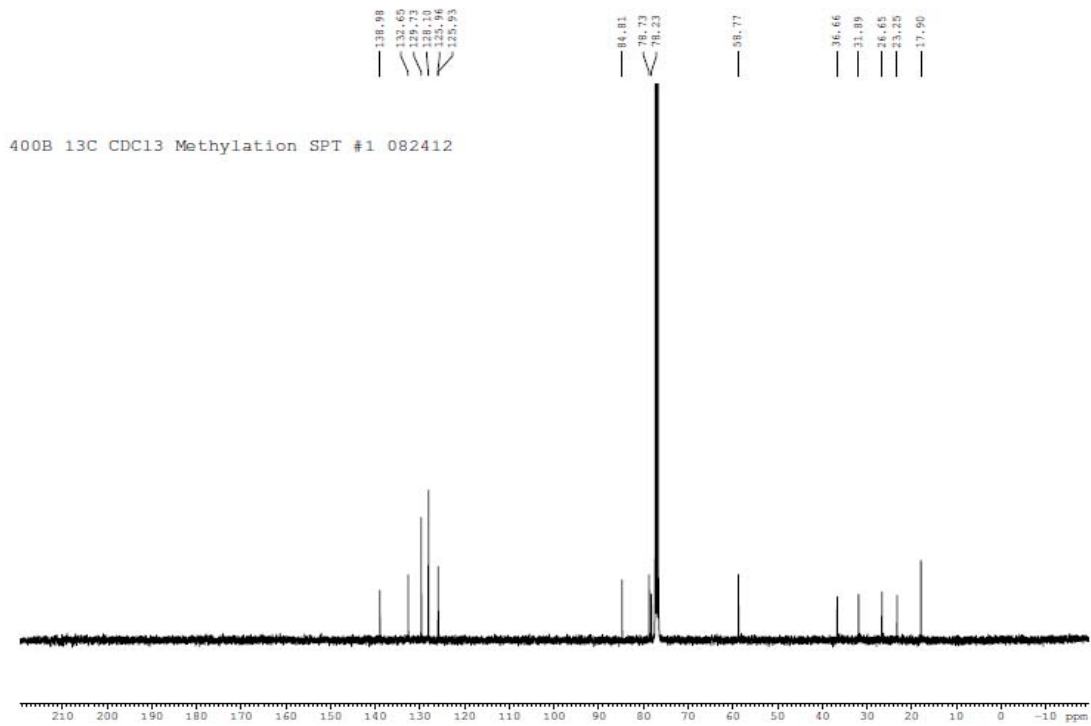

400B 1HCOSY CDC13 Methylation SPT #1 082412

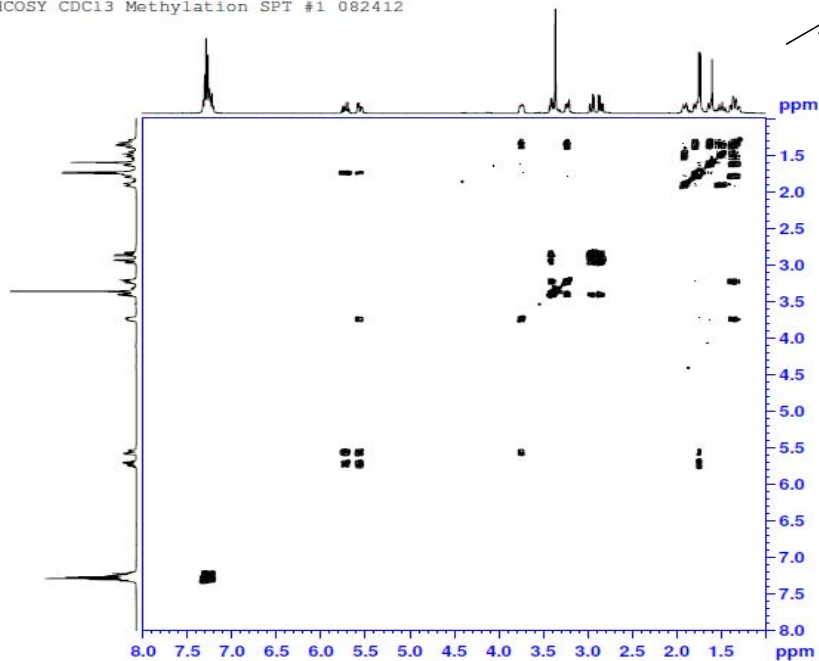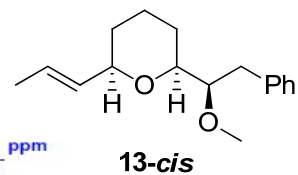

7.304  
7.285  
7.223  
7.216  
7.207  
7.202  
7.187  
5.644  
5.628  
5.613  
5.602  
5.592  
4.338  
4.328  
3.604  
3.598  
3.583  
3.567  
3.559  
3.431  
3.421  
3.413  
3.403  
3.396  
3.386  
3.271  
2.998  
2.989  
2.963  
2.954  
2.772  
2.754  
2.737  
2.719  
1.782  
1.772  
1.761  
1.749  
1.737  
1.712  
1.699  
1.686  
1.674  
1.666  
1.659  
1.647  
1.633  
1.623  
1.574  
1.554  
1.534  
1.517  
1.497  
1.486

400B 1H CDC13 Methylation SPT #2 082412

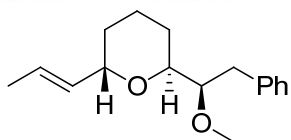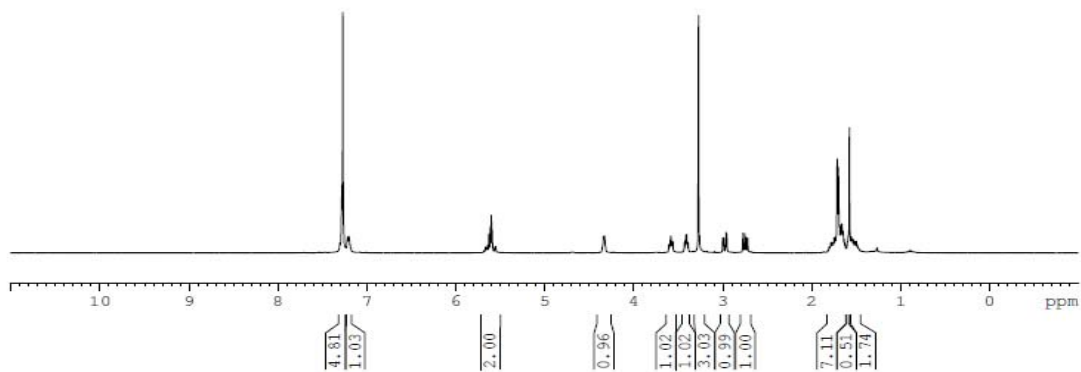

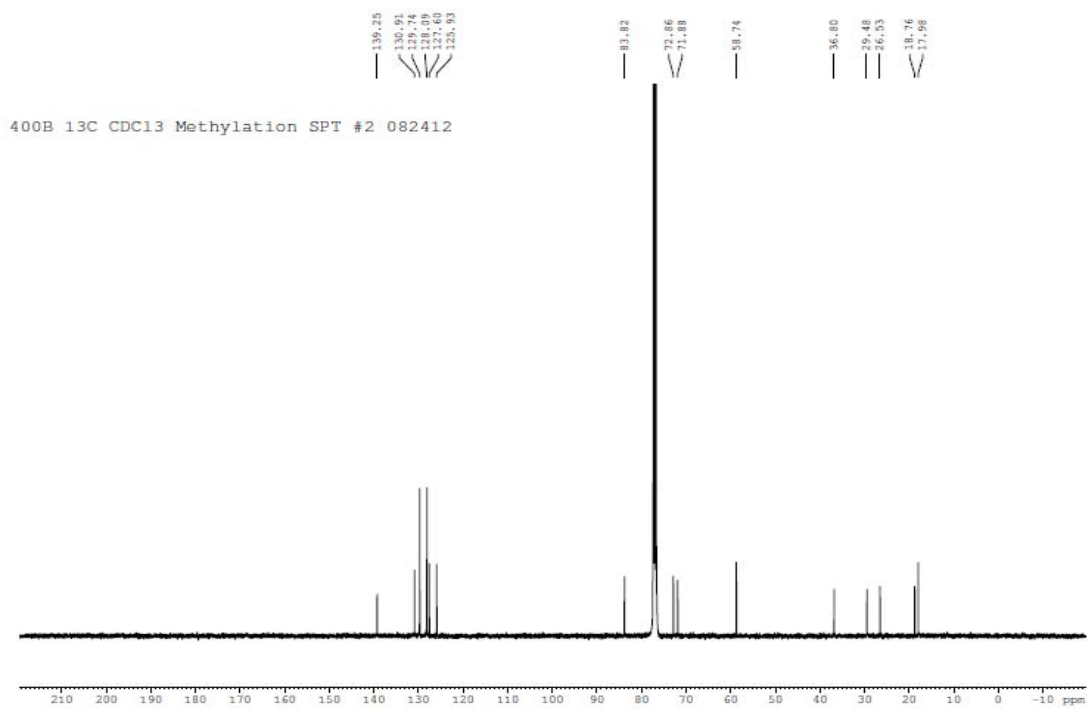

400B 1H COSY CDC13 Methylation SPT #2 082412

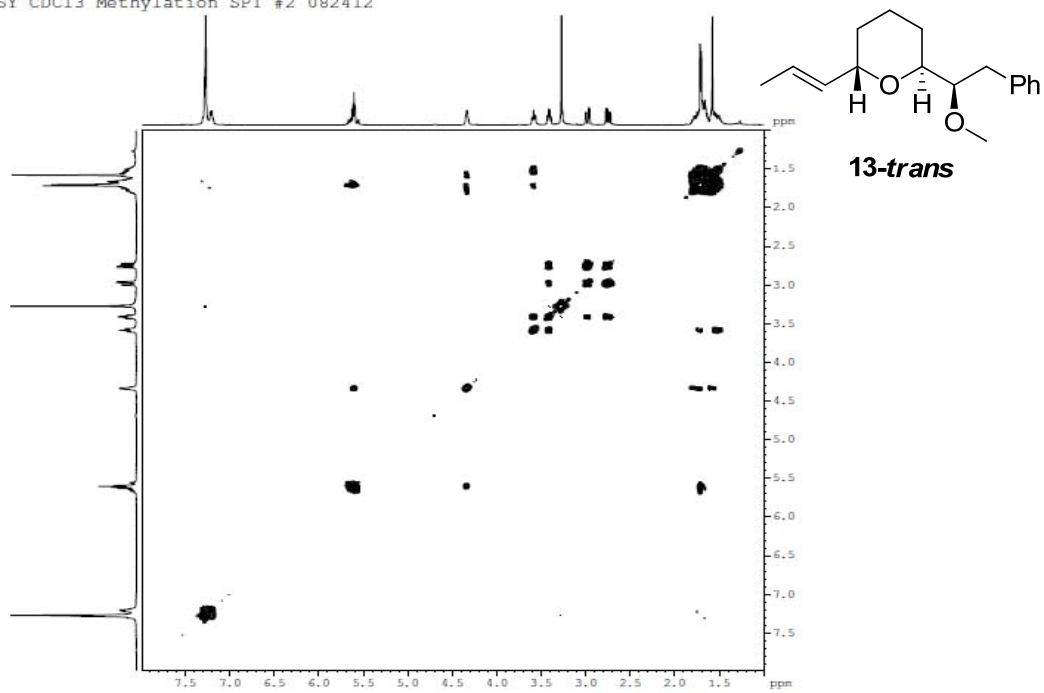

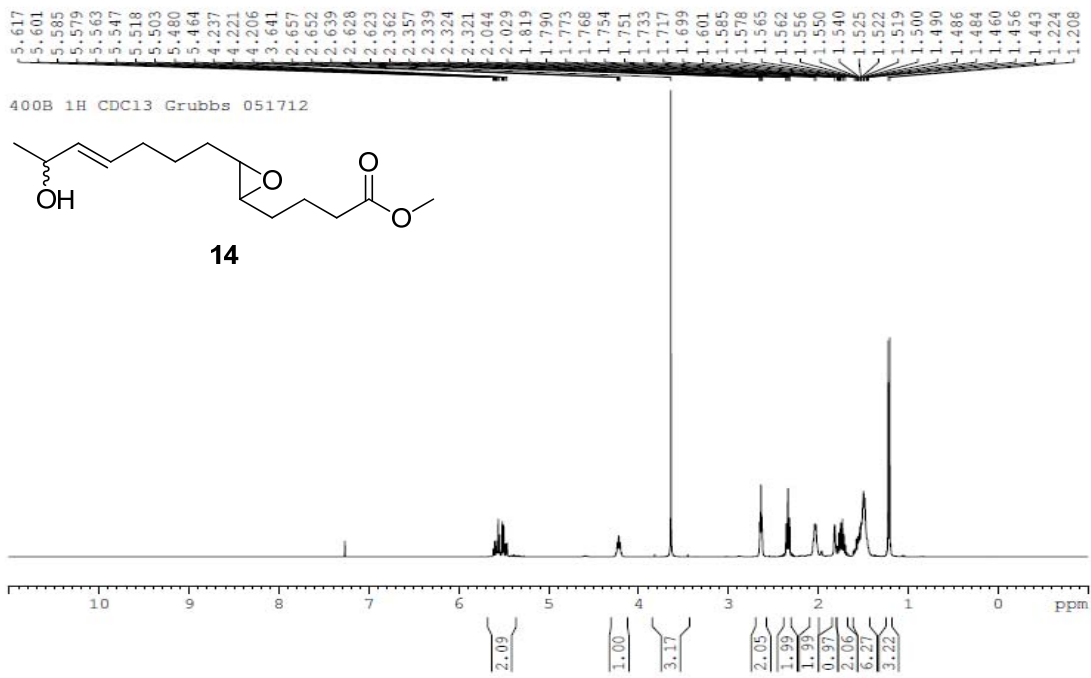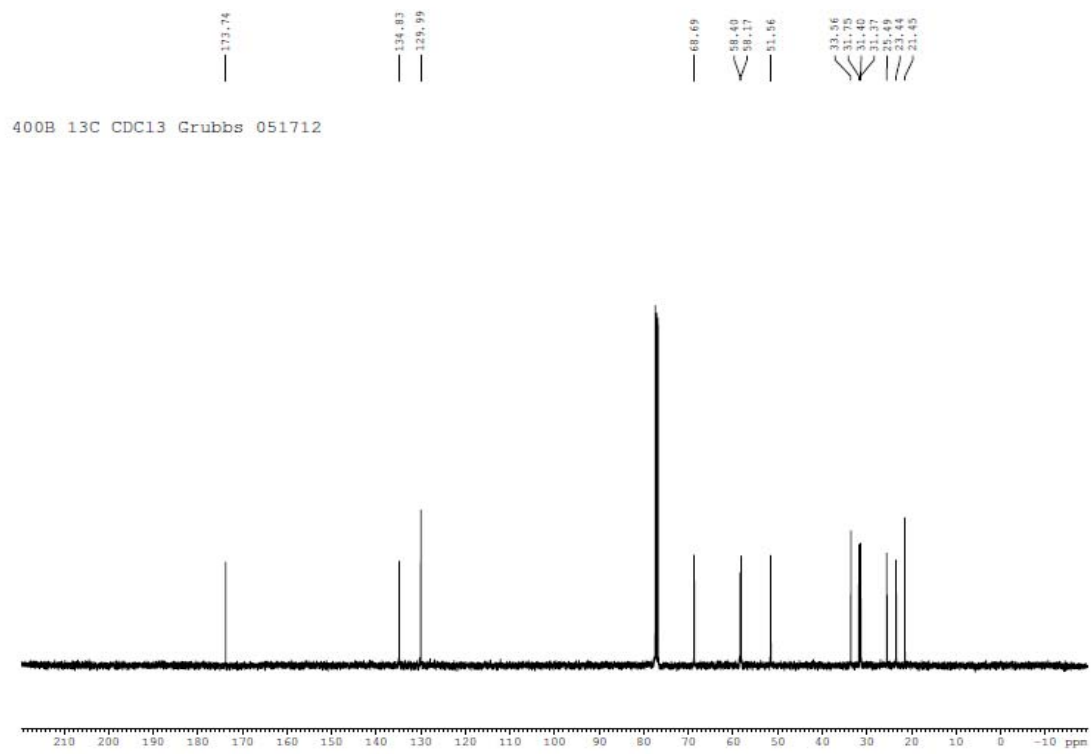

400B 1H CDC13 Rear 091812

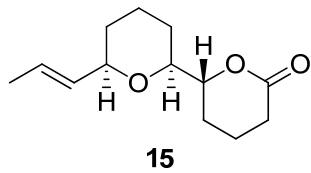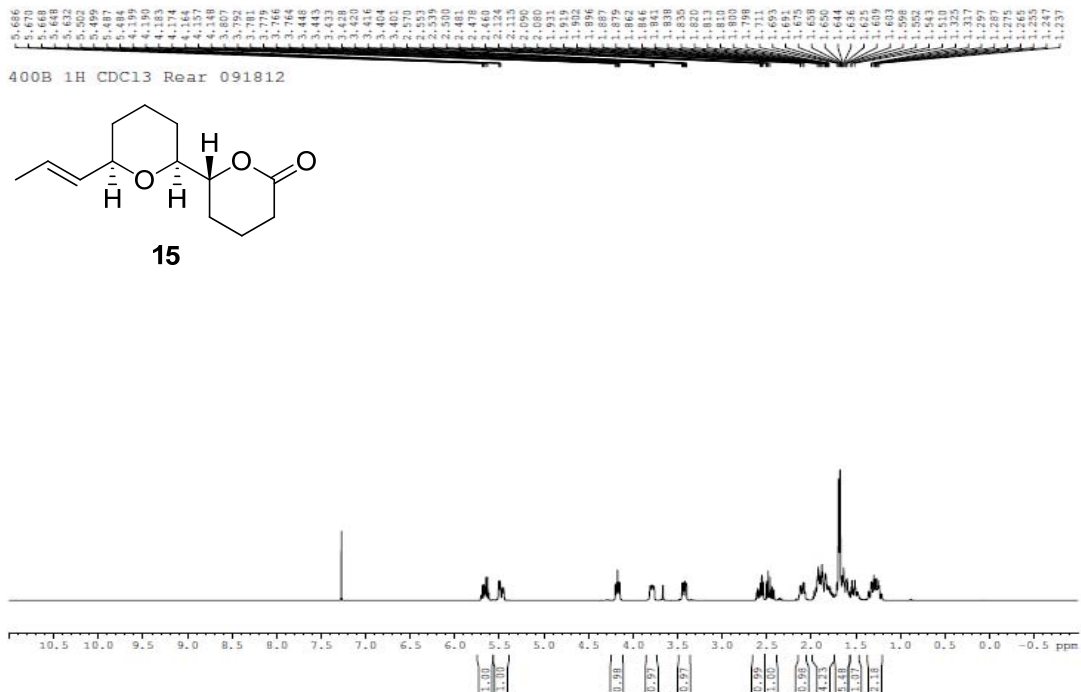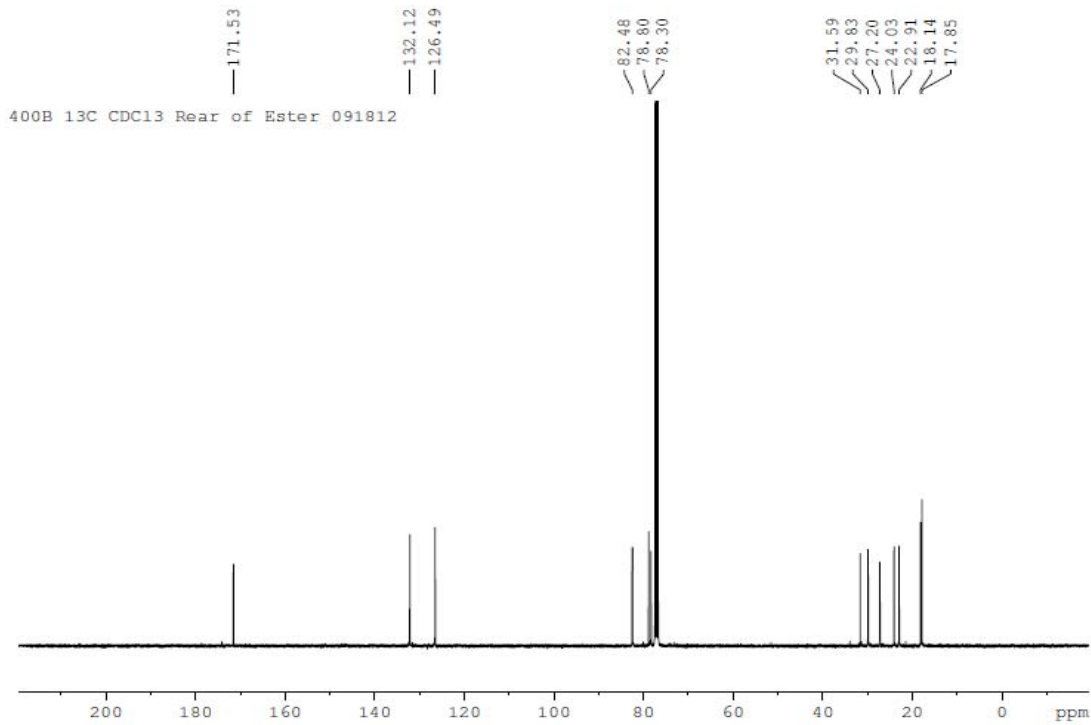



400B 1HCOSY CDC13 Rear 091812

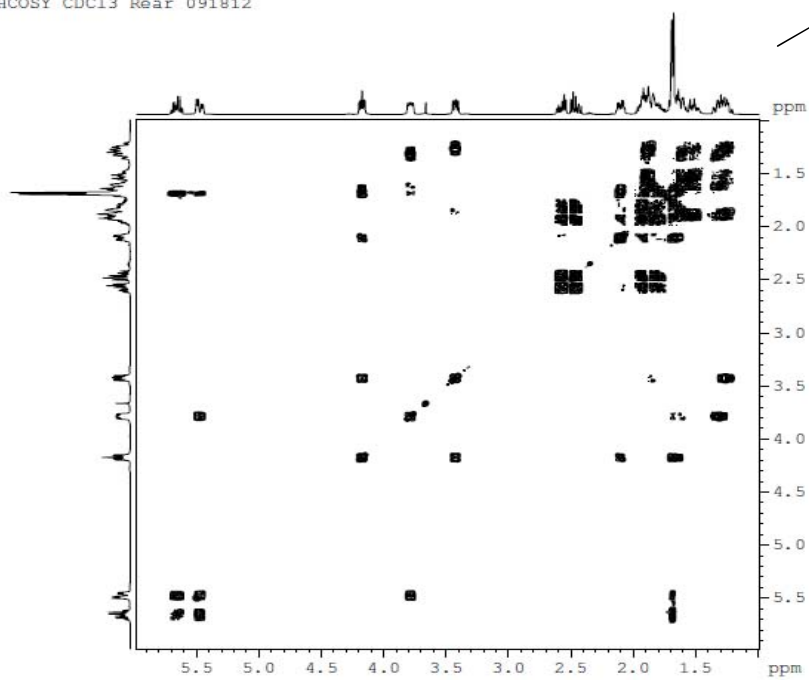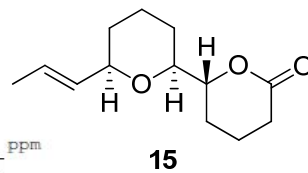

400B 1HNOESY CDC13 Rear 091812

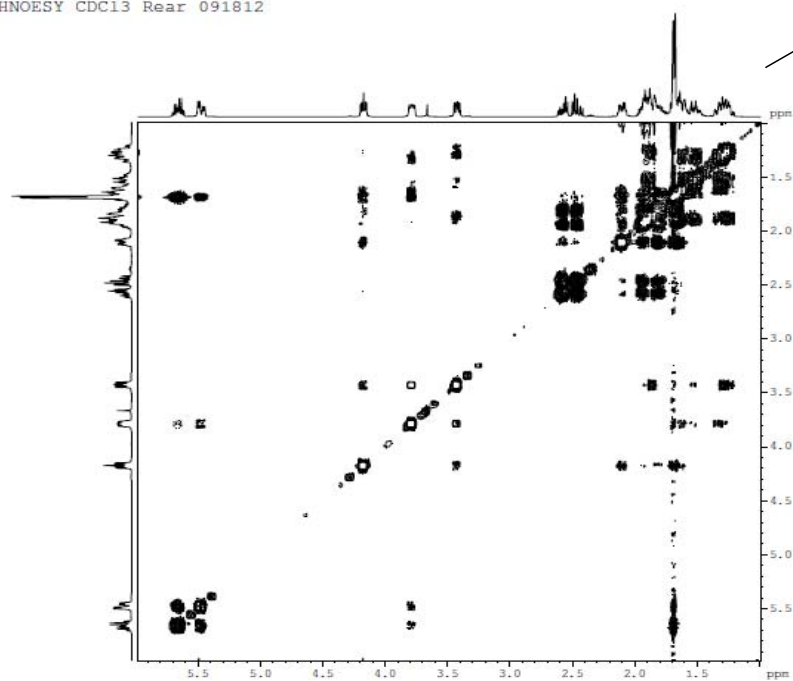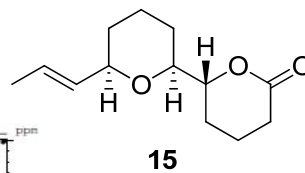

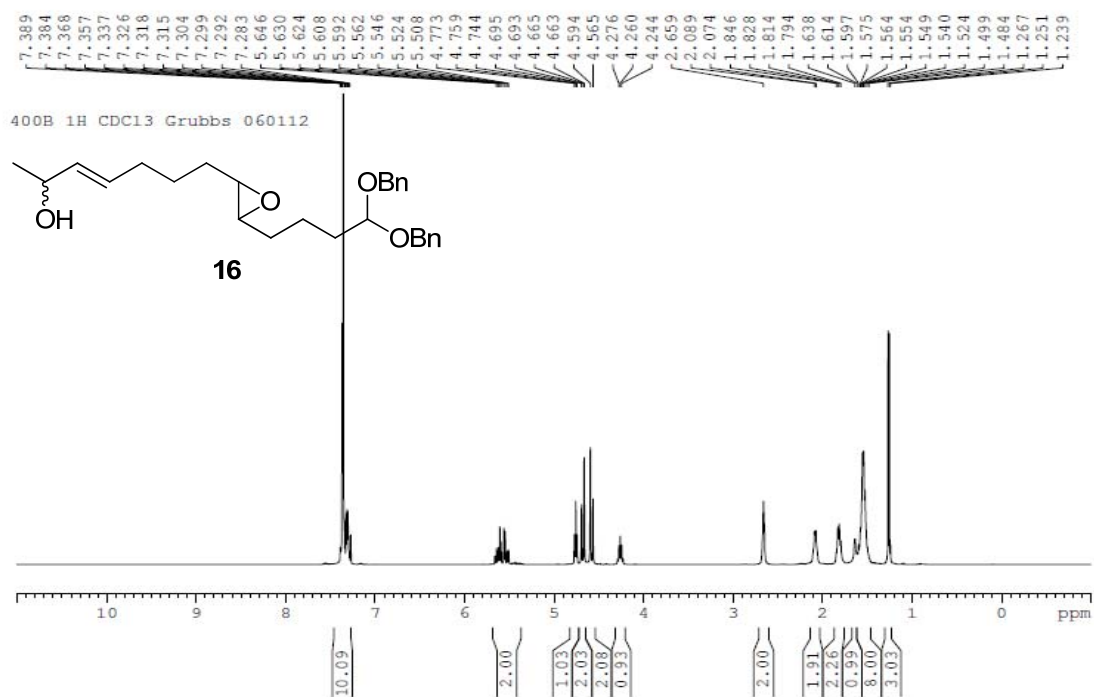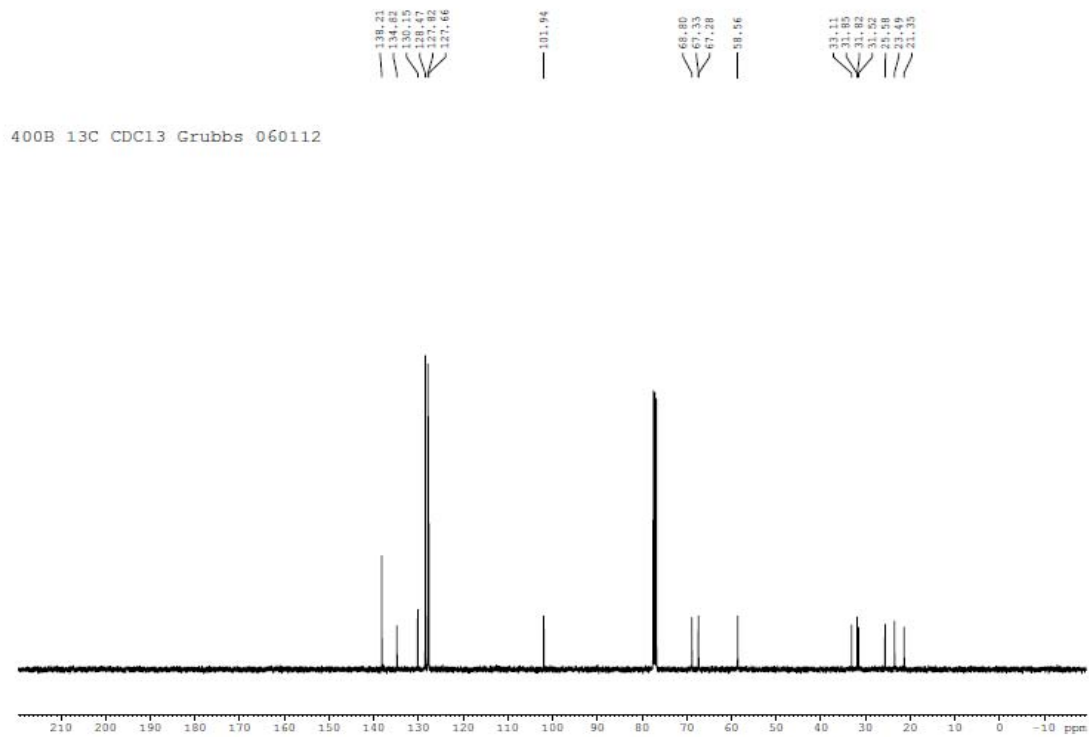

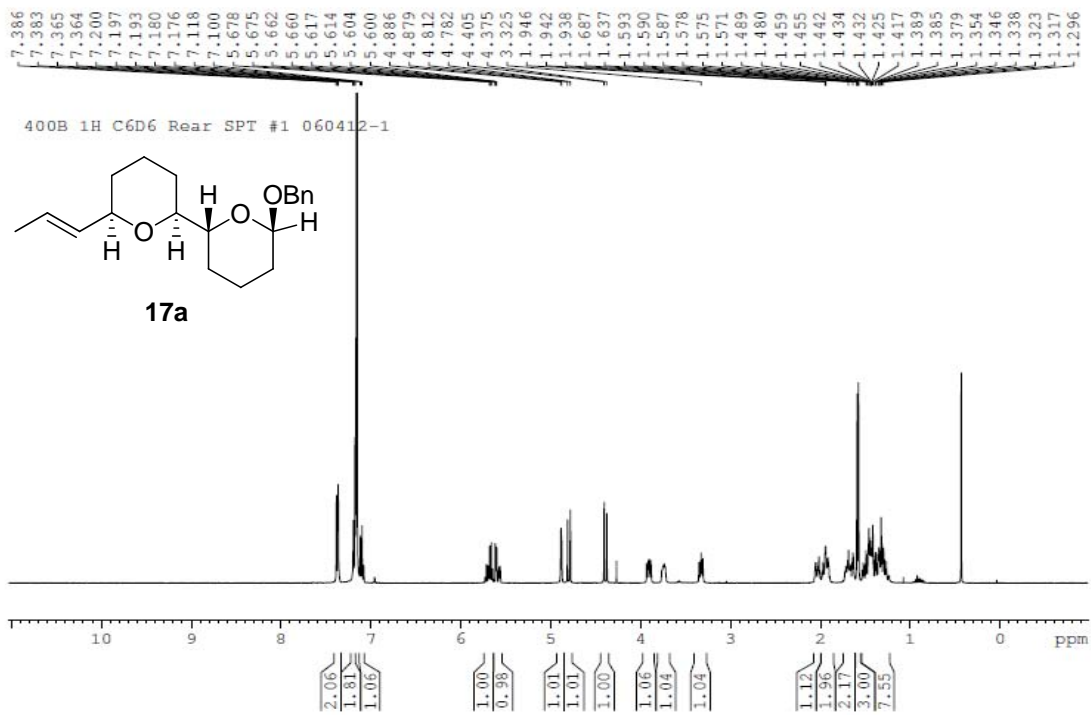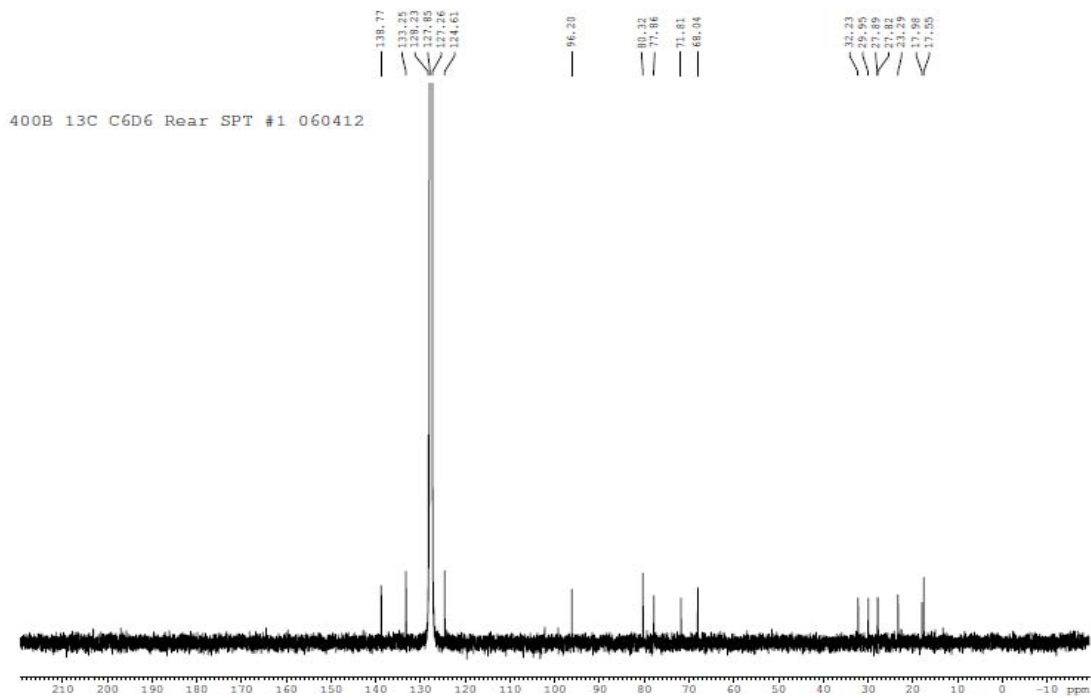

400B 1HCOSY C6D6 Rear SPT #1 060412

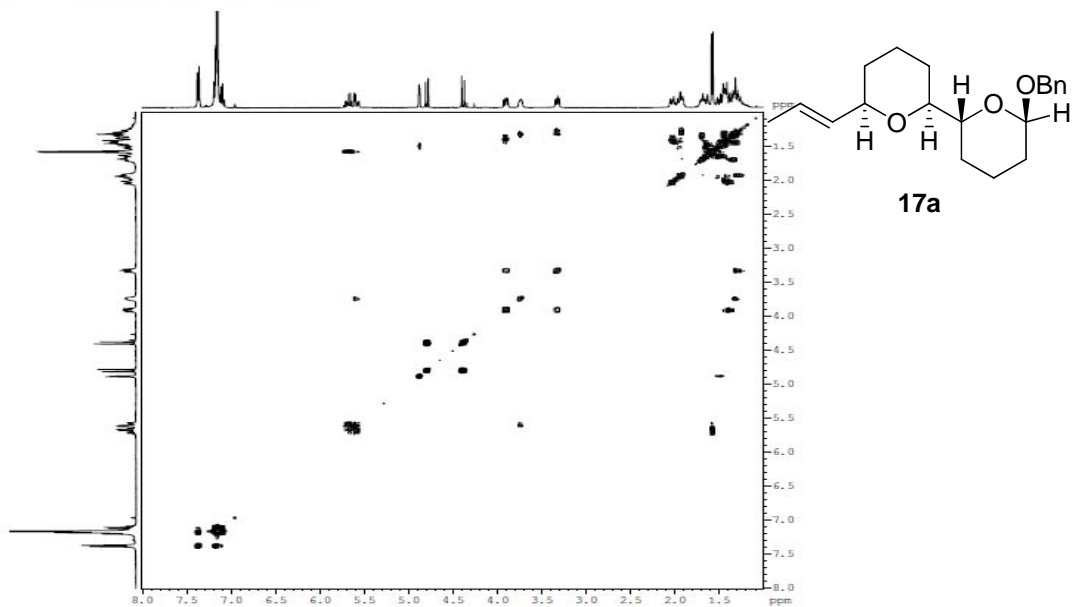

400B 1HNOESY C6D6 Rear SPT #1 060412

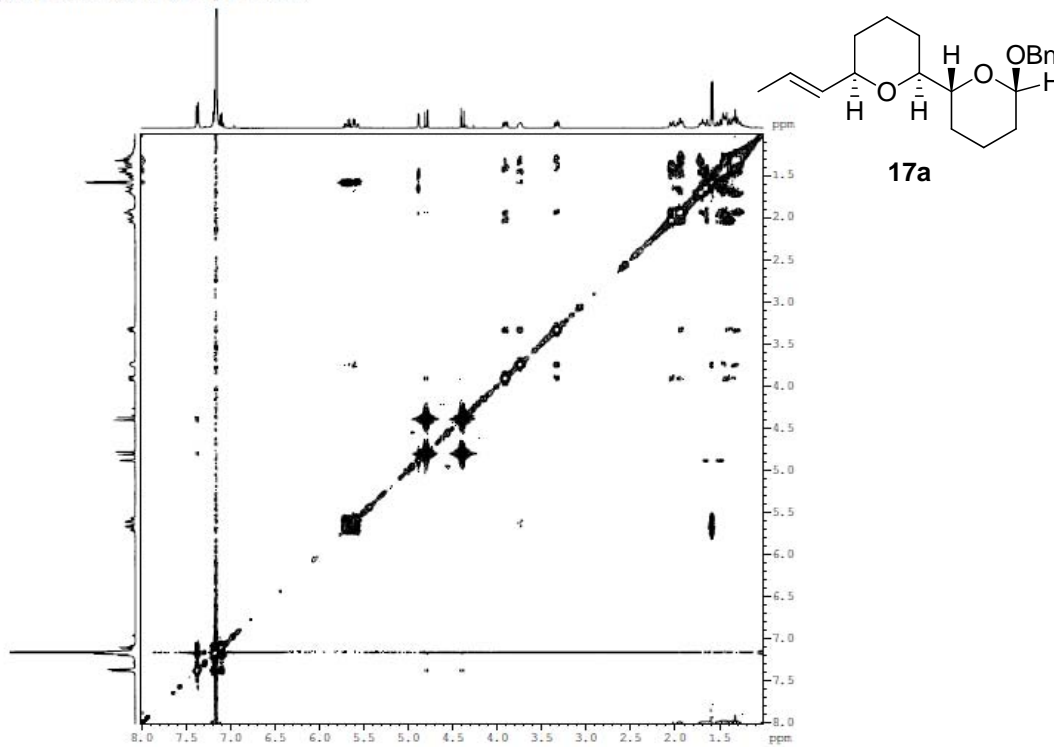

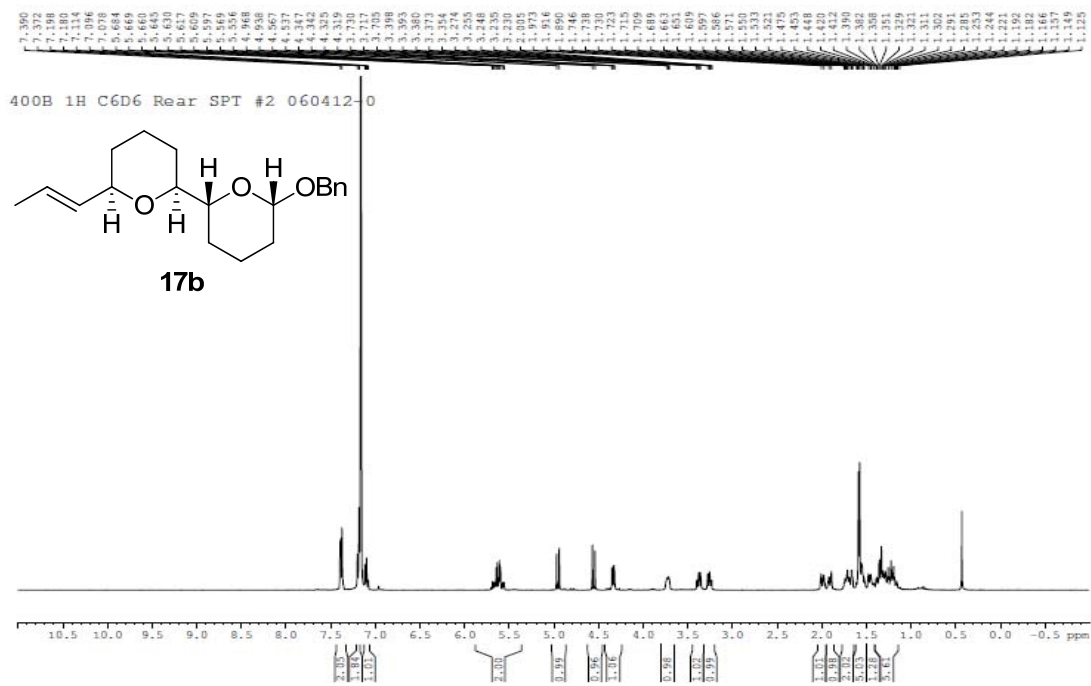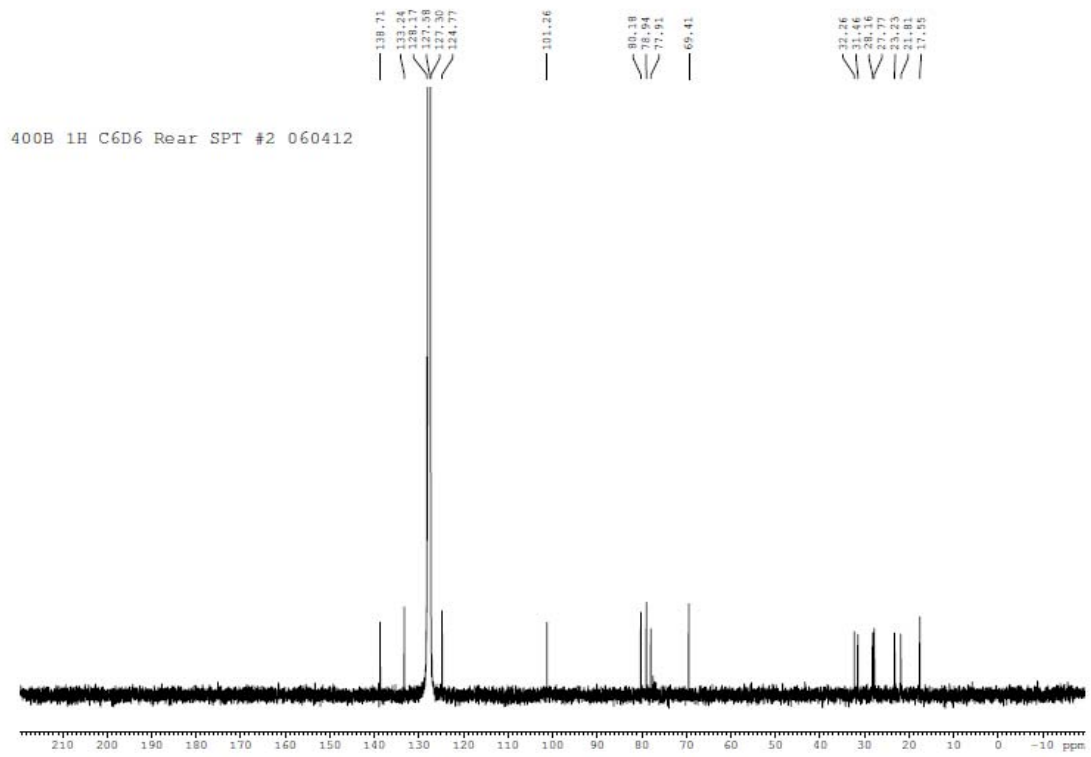

400B 1HCOSY C6D6 Rear SPT #2 060412-1

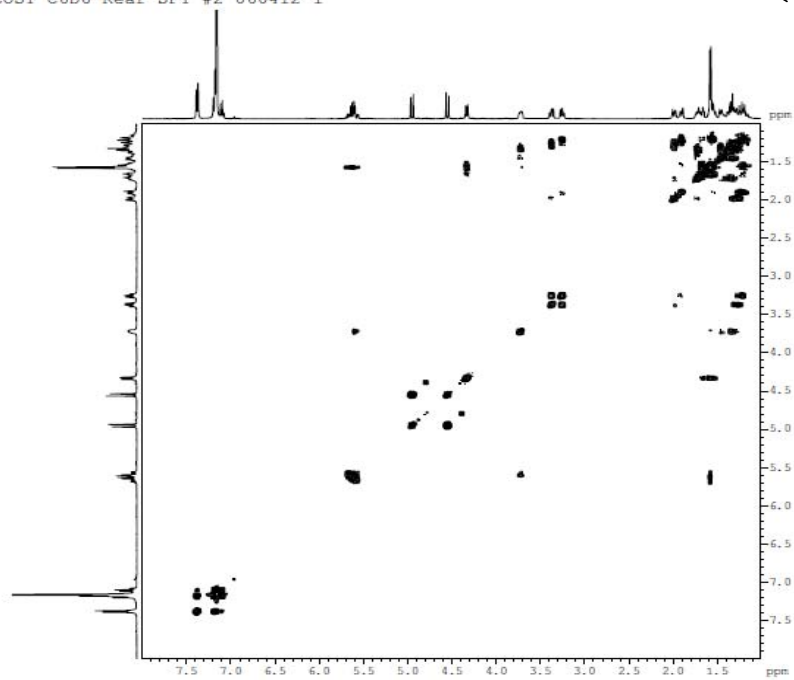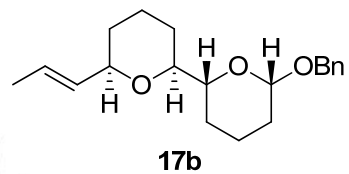

400B 1HNOESY C6D6 Rear SPT #2 060412-1

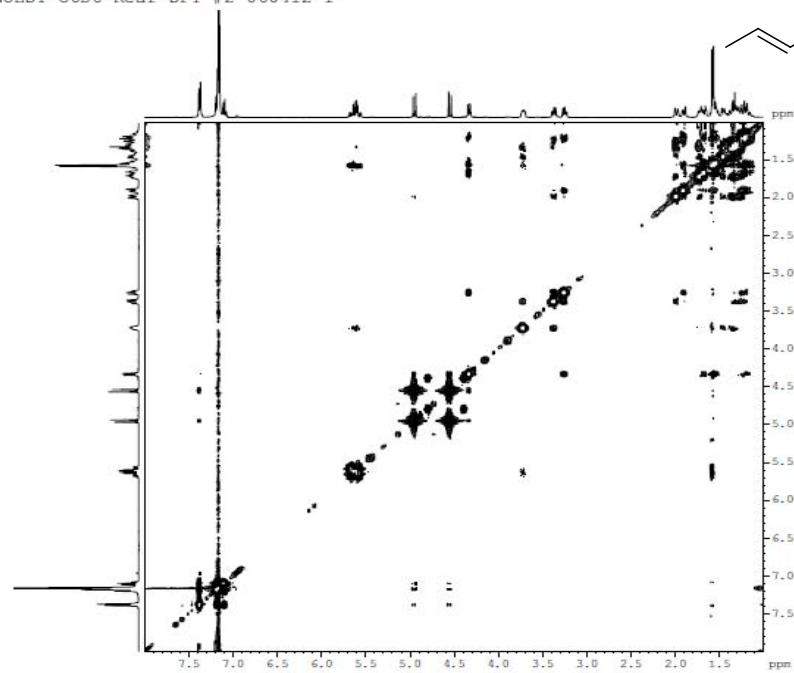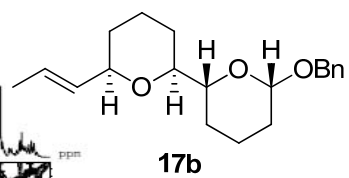



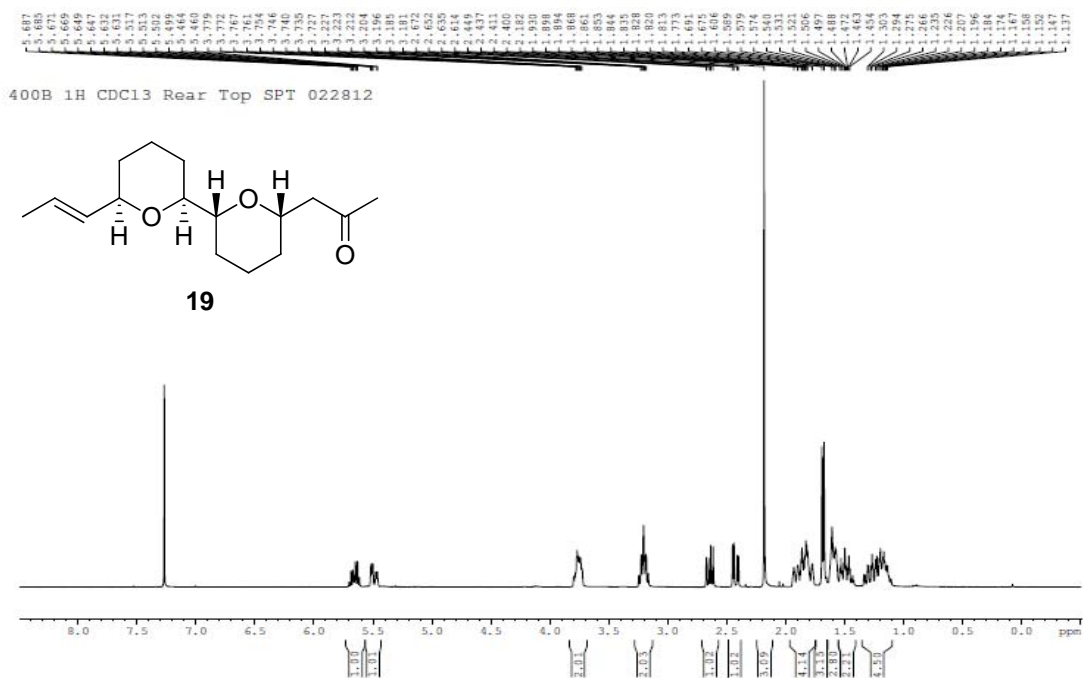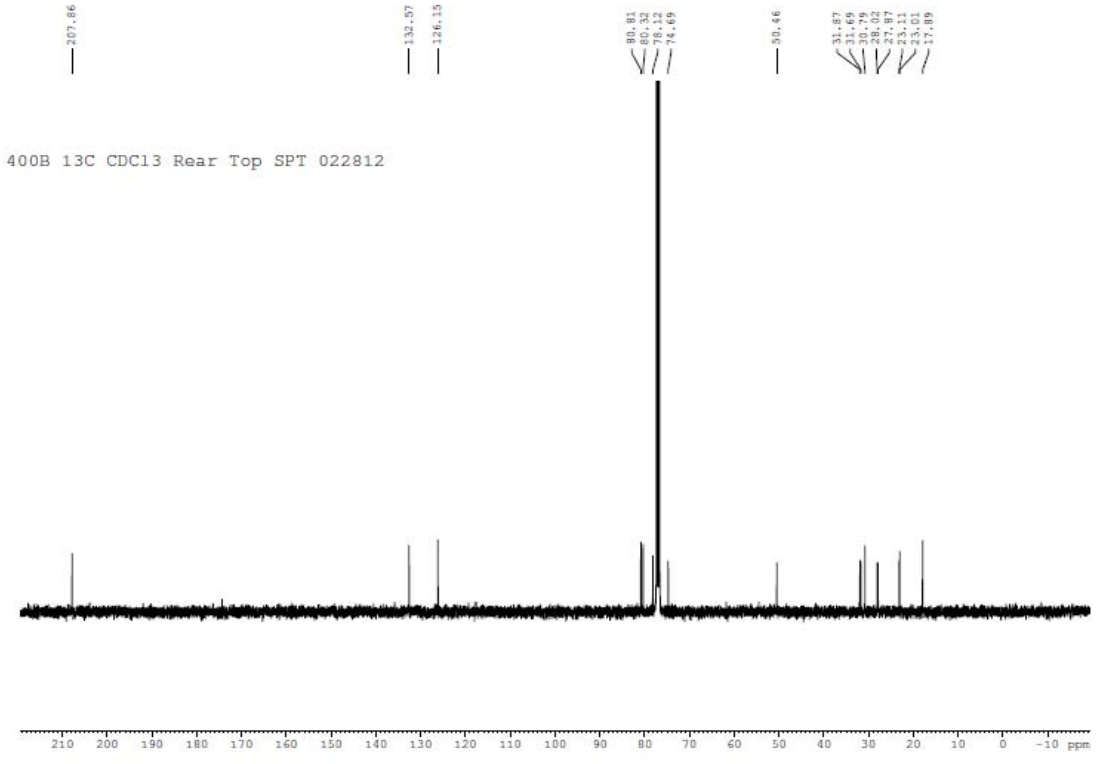



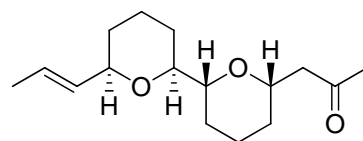

19

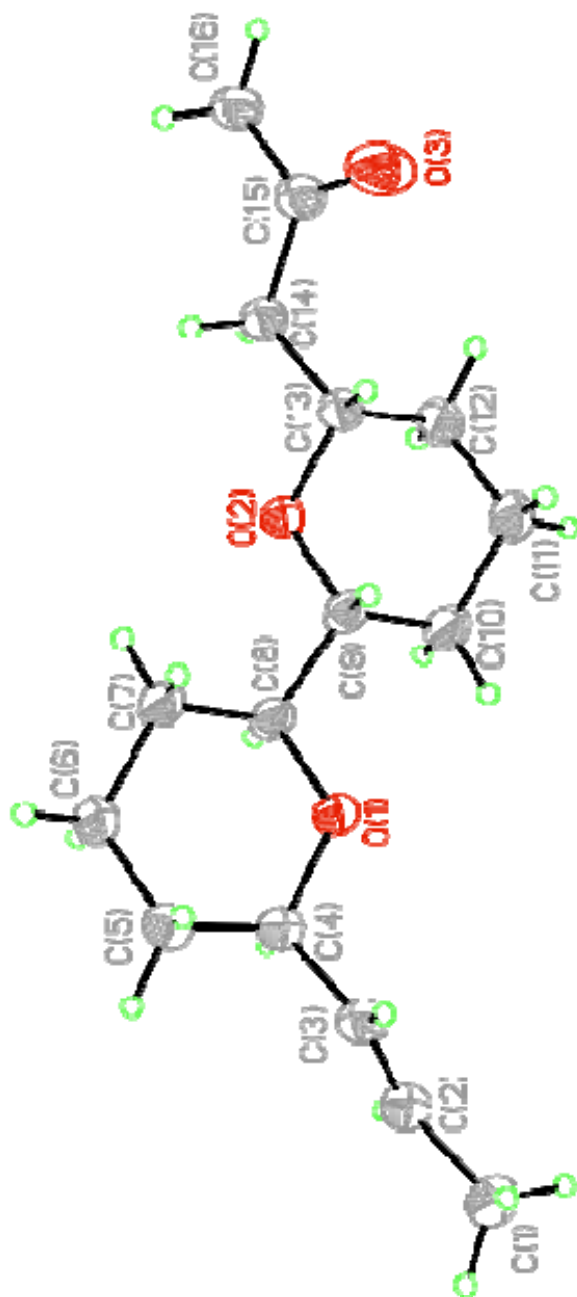

7.339  
7.323  
7.320  
7.309  
7.303  
7.263  
7.261  
7.248  
7.244  
7.229  
5.647  
5.642  
5.639  
5.635  
5.631  
4.083  
4.078  
4.078  
2.929  
2.915  
2.911  
2.906  
2.902  
2.898  
2.892  
2.820  
2.802  
2.785  
2.781  
2.773  
2.769  
2.764  
2.758  
2.758  
2.428  
2.407  
2.407  
2.389  
2.370  
2.352  
2.352  
2.066  
2.048  
2.048  
2.040  
2.038  
2.029  
2.022  
1.712  
1.712  
1.708  
1.700  
1.692  
1.682  
1.682  
1.674  
1.674  
1.662  
1.656  
1.642  
1.637  
1.488

400B 1H CDC13 Grubbs 060612

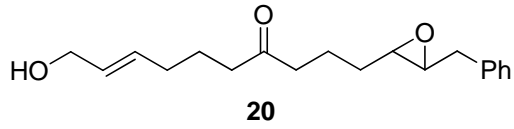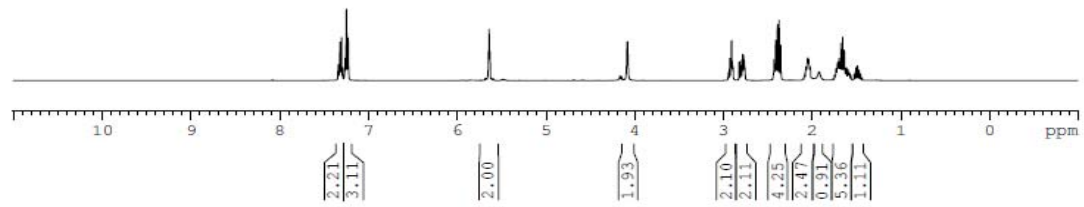

130.57

137.31  
128.90  
128.93  
128.57  
126.64

61.48  
88.99  
88.43

42.84  
41.93  
38.44  
31.55  
31.16  
33.01  
30.18

400B 13C CDC13 Grubbs 060612

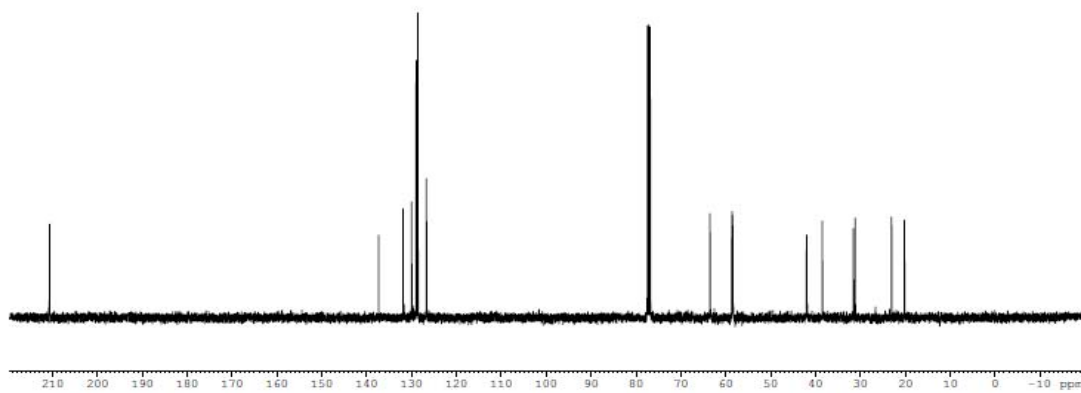

400B 1H CDC13 Rear Major 060812

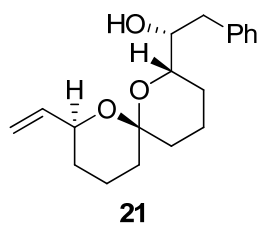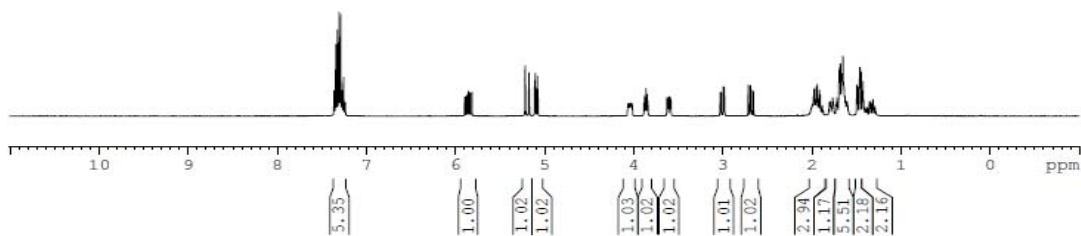

400B 13C CDC13 Rear Major 060812

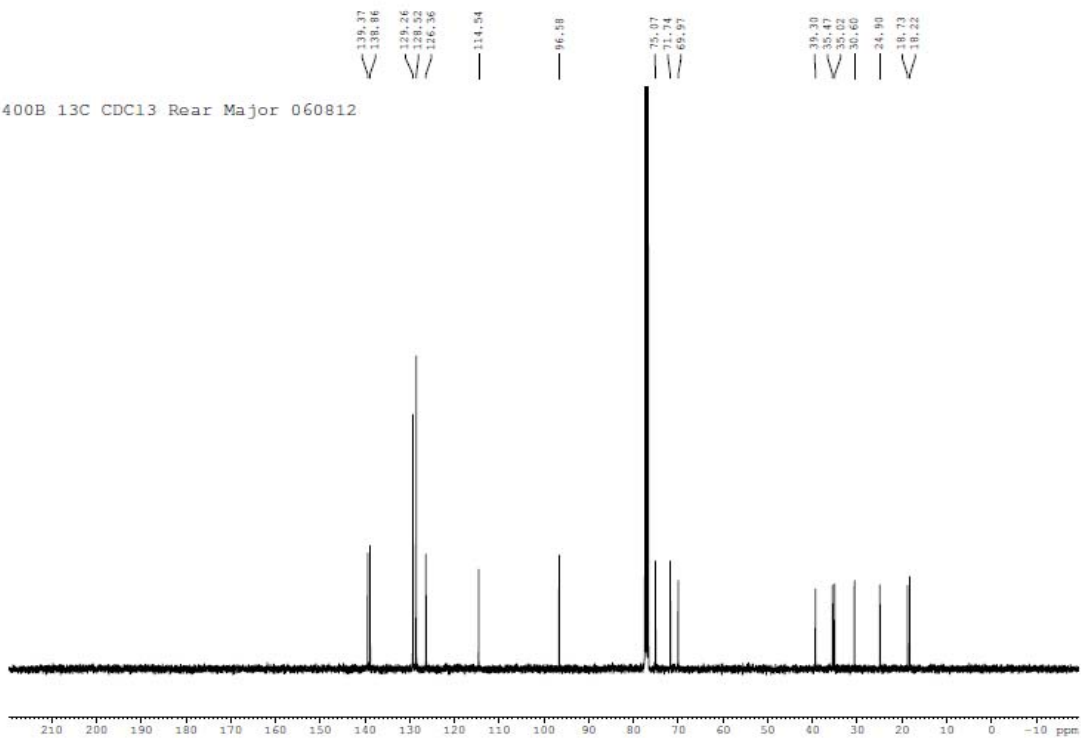

400B 1HCOZY CDC13 Rear Major 060812

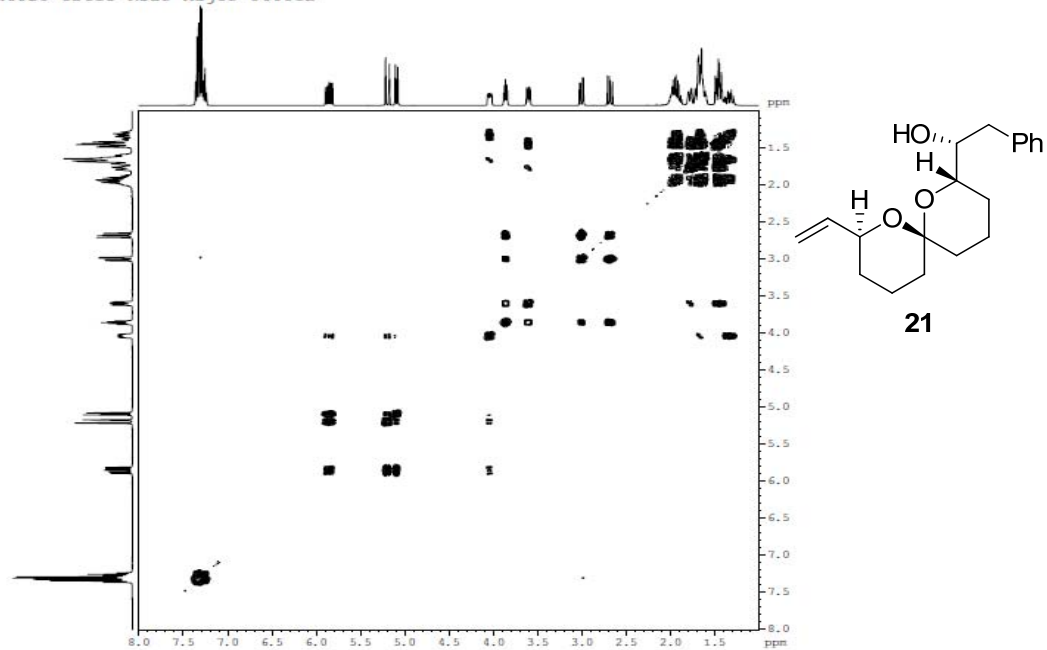

400B 1HNOESY CDC13 Rear Major 060812

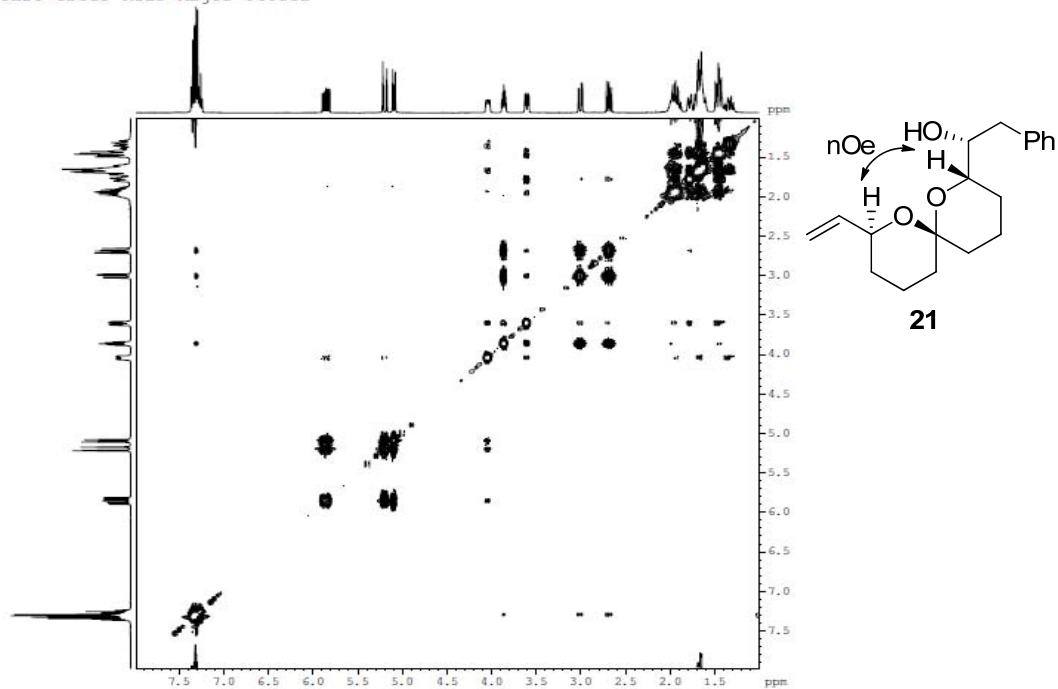

7.323  
7.307  
7.304  
7.302  
7.287  
7.245  
7.234  
7.228  
7.215  
5.554  
5.540  
5.534  
5.519  
4.240  
2.913  
2.901  
2.896  
2.891  
2.887  
2.878  
2.806  
2.788  
2.771  
2.766  
2.758  
2.754  
2.749  
2.743  
2.412  
2.392  
2.375  
2.368  
2.350  
2.331  
2.028  
2.011  
1.995  
1.993  
1.977  
1.699  
1.694  
1.686  
1.682  
1.676  
1.669  
1.651  
1.633  
1.627  
1.614  
1.593  
1.494  
1.477  
1.247  
1.231

400B 1H CDC13 Grubbs 052812

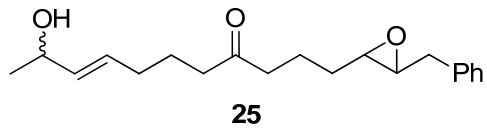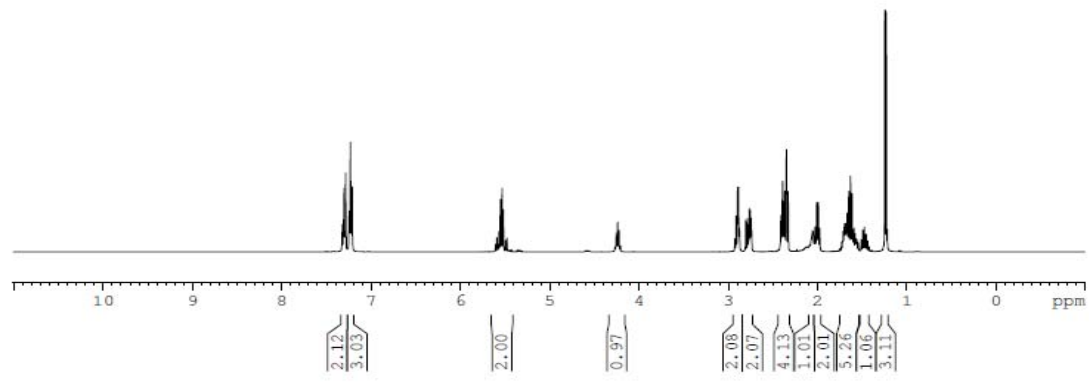

210.54  
137.31  
136.57  
135.55  
128.92  
128.55  
126.62  
68.57  
38.57  
38.40  
42.01  
41.92  
38.43  
31.45  
31.15  
31.09  
23.07  
20.17

400B 13C CDC13 Grubbs 052812

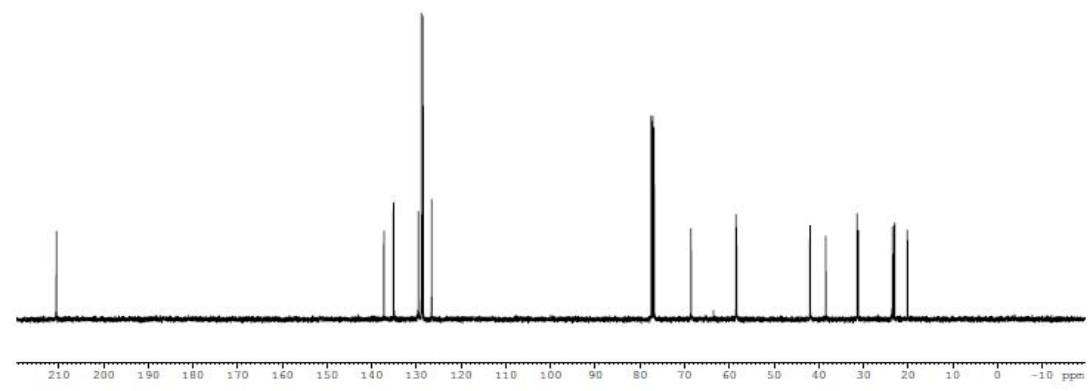



400B 1HCOSY CDC13 Rear Major 061212

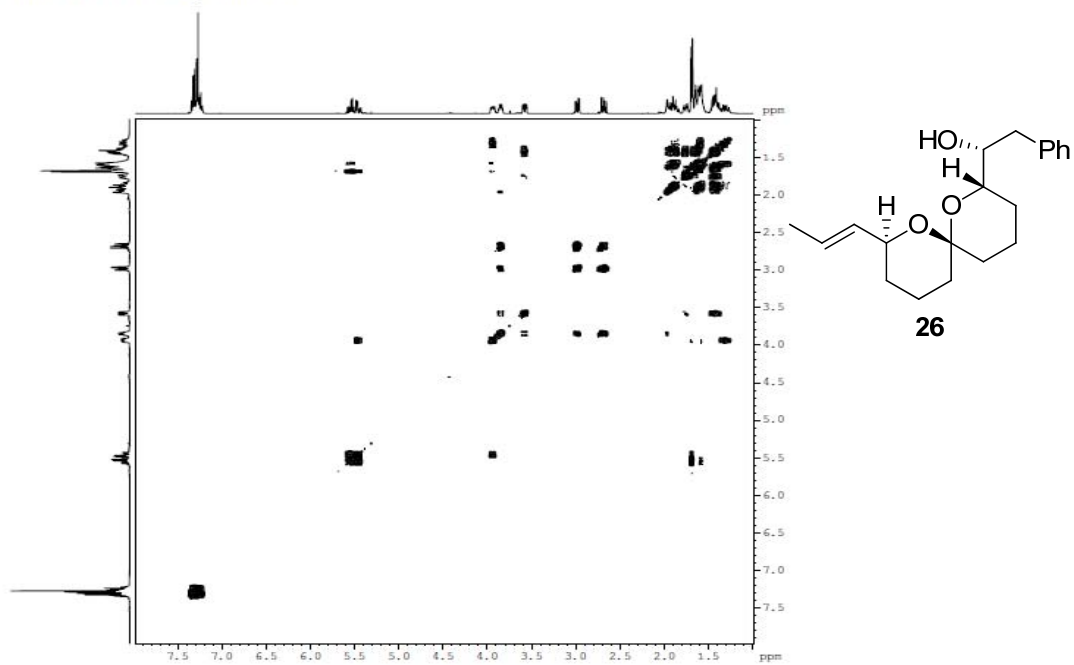

400B 1HNOESY CDC13 Rear Major 061212

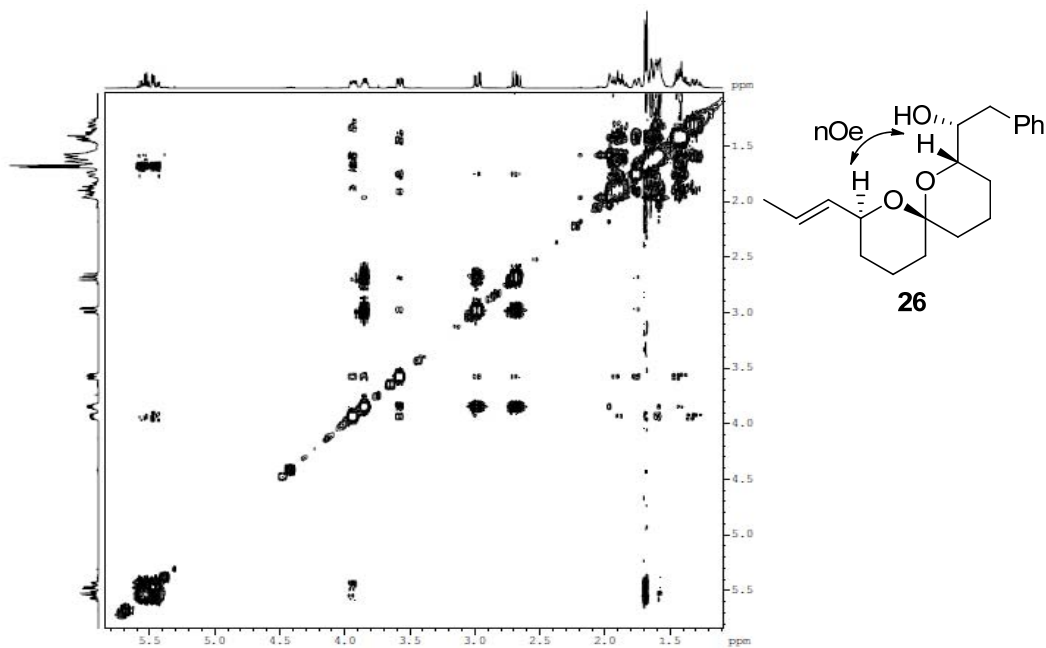

7.320  
7.301  
7.283  
7.240  
7.222  
5.679  
5.666  
5.639  
5.627  
5.585  
5.573  
4.015  
2.875  
2.861  
2.838  
2.824  
2.807  
2.789  
2.768  
2.740  
2.726  
2.713  
2.538  
2.520  
2.501  
2.452  
2.434  
2.416  
2.403  
2.385  
2.366  
2.330  
2.313  
2.281  
2.265  
2.251  
1.731  
1.692  
1.678  
1.660  
1.641  
1.623  
1.606  
1.590

400A 1H CD2C12 Grubbs 062912

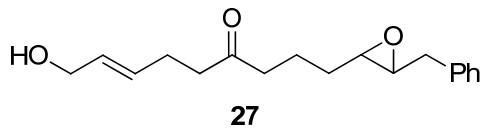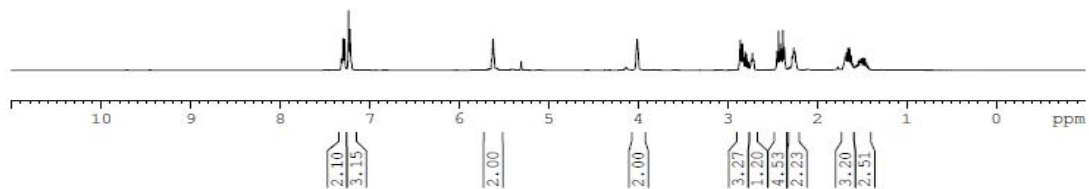

209.85  
138.11  
133.07  
128.33  
128.32  
128.84  
126.89  
63.60  
58.82  
56.63  
42.37  
42.28  
38.79  
31.57  
26.61  
20.50

400A 13C CD2C12 Grubbs 062912

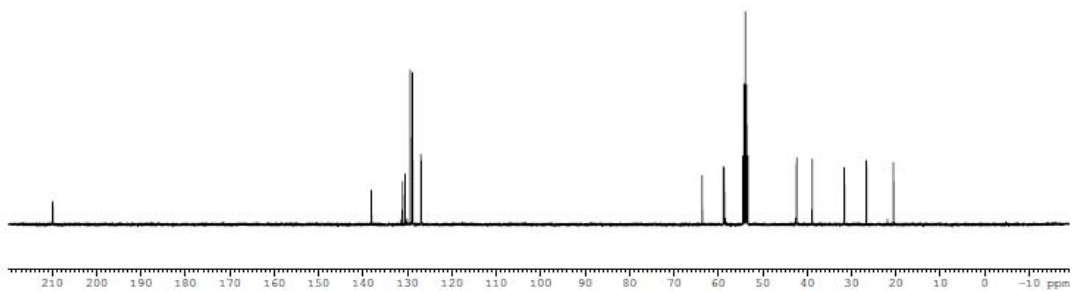



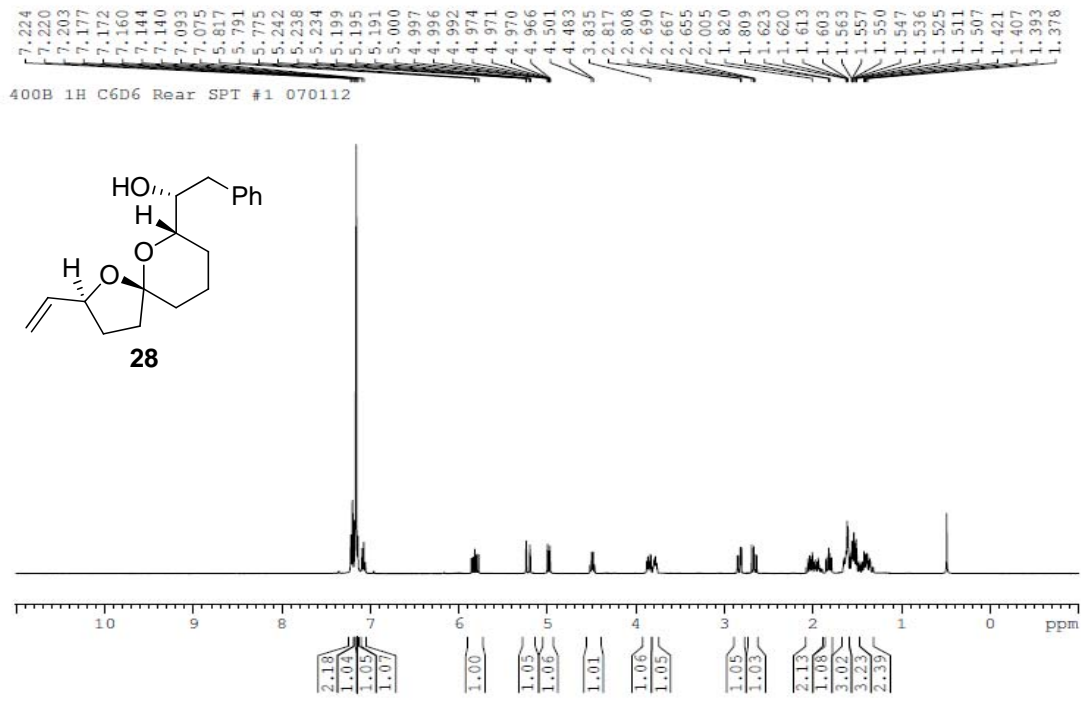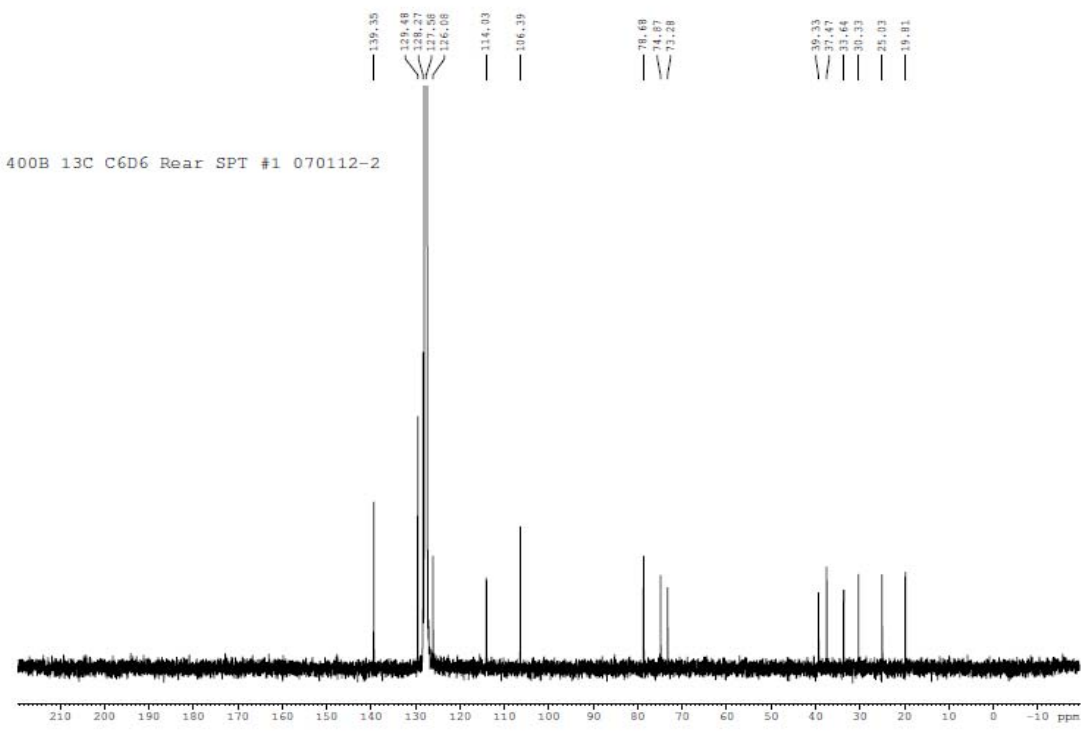

400B 1HCOSY C6D6 Rear SPT #1 070112

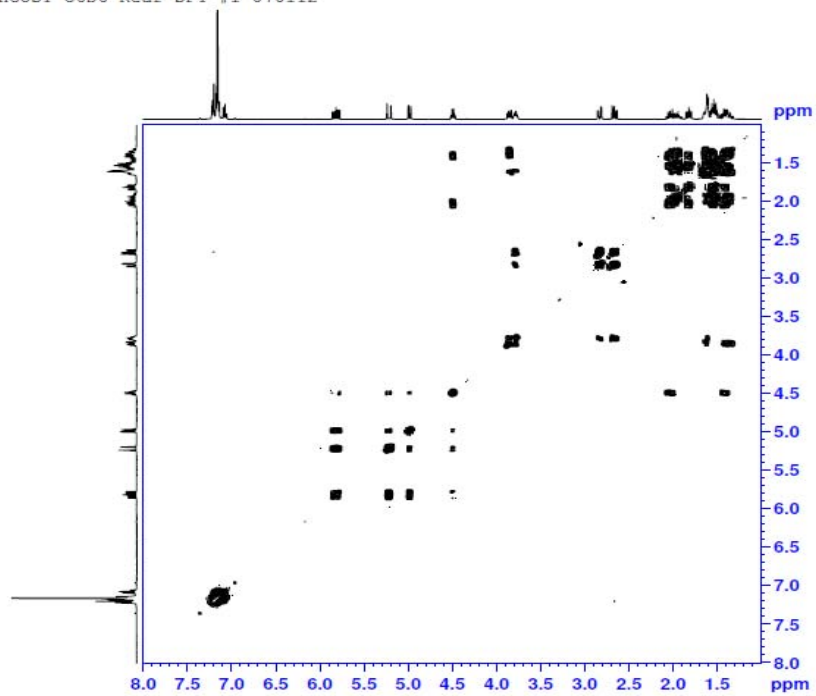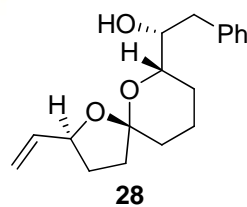

400B 1HNOESY C6D6 Rear SPT #1 070112

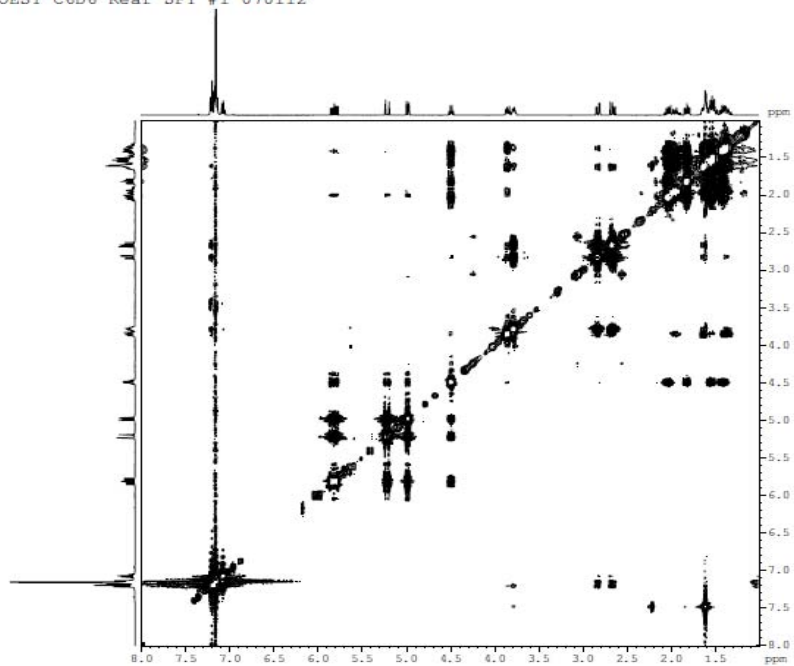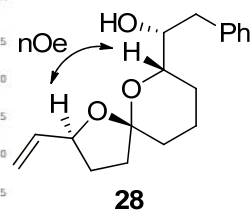



400B 1HCOSY C6D6 Rear SPT #2 070112

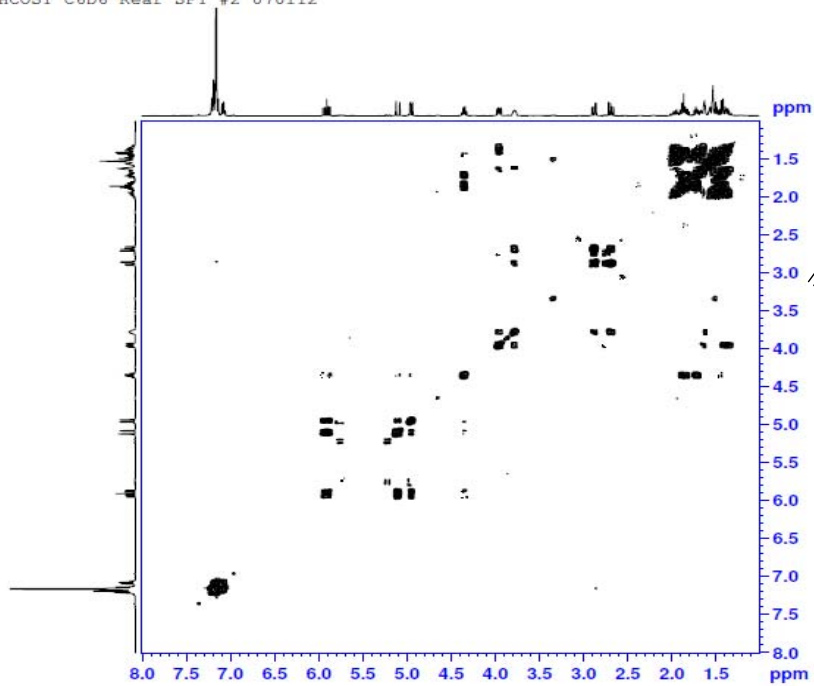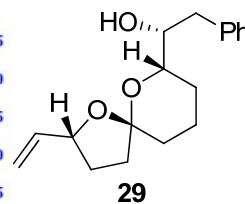

400B 1HNOESY C6D6 Rear SPT #2 070112

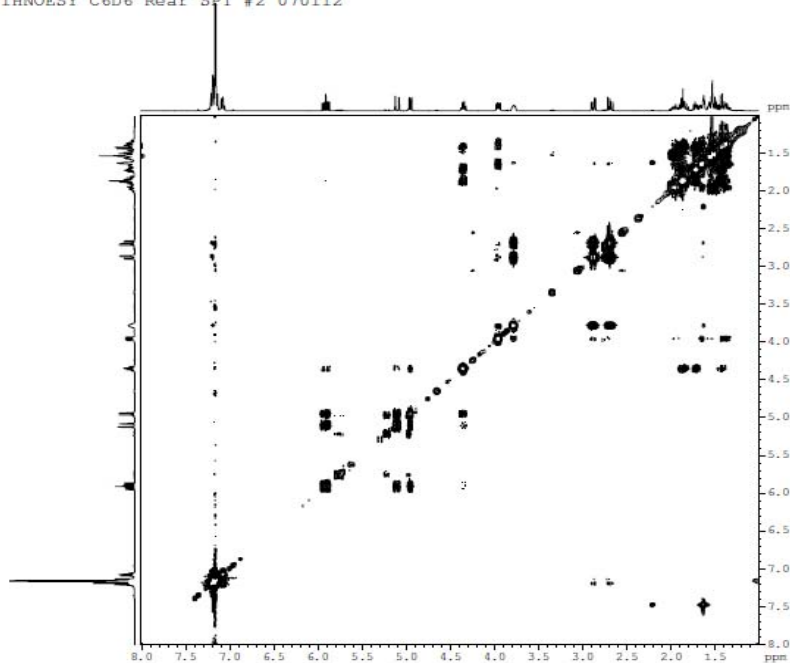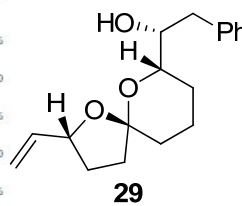

6.797  
6.790  
6.763  
6.758  
6.750  
6.722  
6.658  
6.035  
6.001  
6.018  
6.011  
6.011  
5.628  
5.622  
5.617  
5.619  
5.607  
5.569  
4.022  
2.640  
2.634  
2.619  
2.612  
2.607  
2.601  
2.432  
2.425  
2.416  
2.399  
2.391  
2.382  
2.285  
2.282  
2.267  
2.264  
2.256  
2.246  
2.191  
2.061  
2.063  
2.057  
2.014  
2.012  
2.006  
1.996  
1.997  
1.690  
1.679  
1.674  
1.669  
1.658  
1.650  
1.640  
1.623  
1.603  
1.580  
1.572  
1.568  
1.558  
1.556  
1.525  
1.522  
1.515  
1.505  
1.500  
1.495  
1.488  
1.480  
1.464  
1.445  
1.429  
1.410  
1.395  
1.375

400B 1H CD2C12 Grubbs 071512

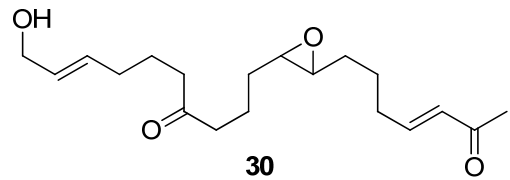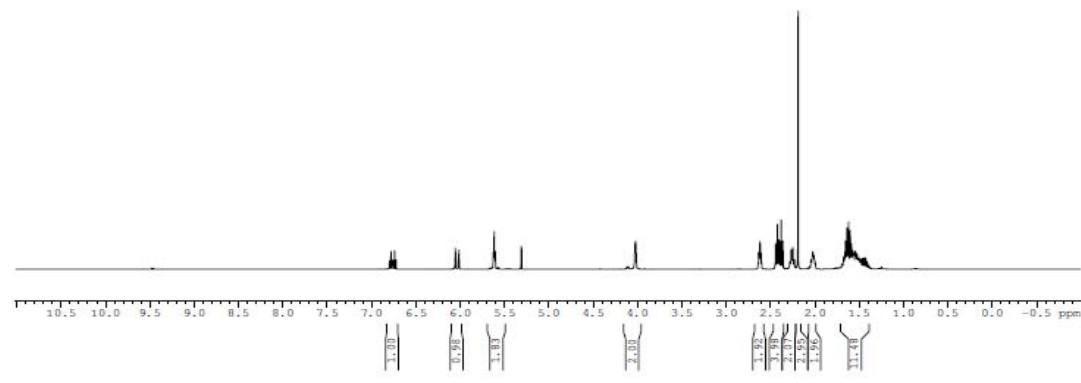

210.13  
199.21  
147.48  
131.61  
131.51  
130.12  
63.33  
59.10  
57.88  
42.08  
41.83  
32.05  
31.03  
31.41  
26.61  
24.61  
23.09  
20.23

400B 13C CD2C12 Grubbs 071512

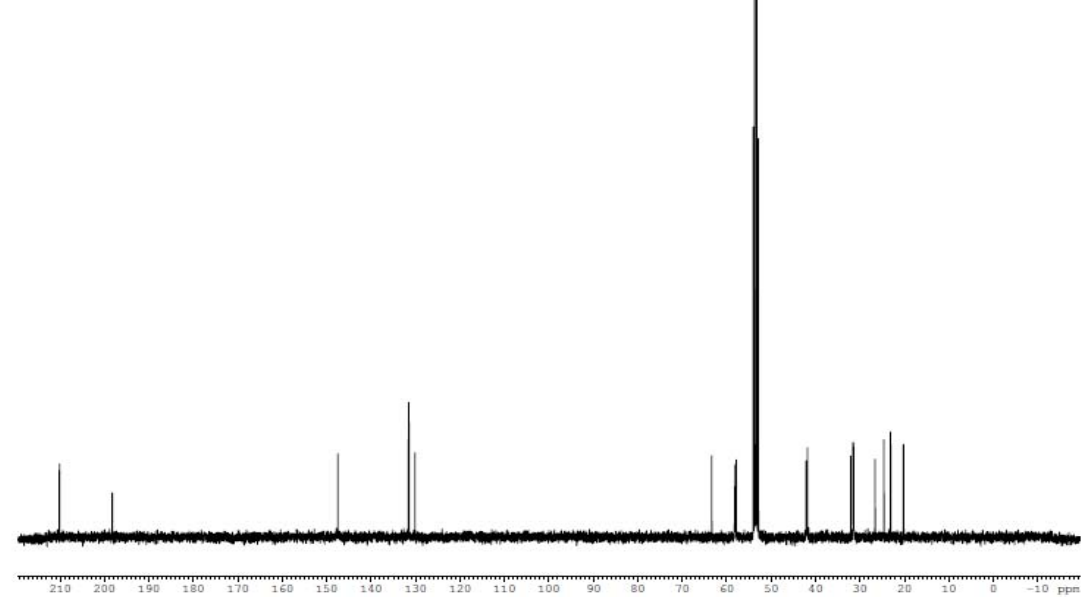



400B 1HCOSY CDC13 Rear Major 071612

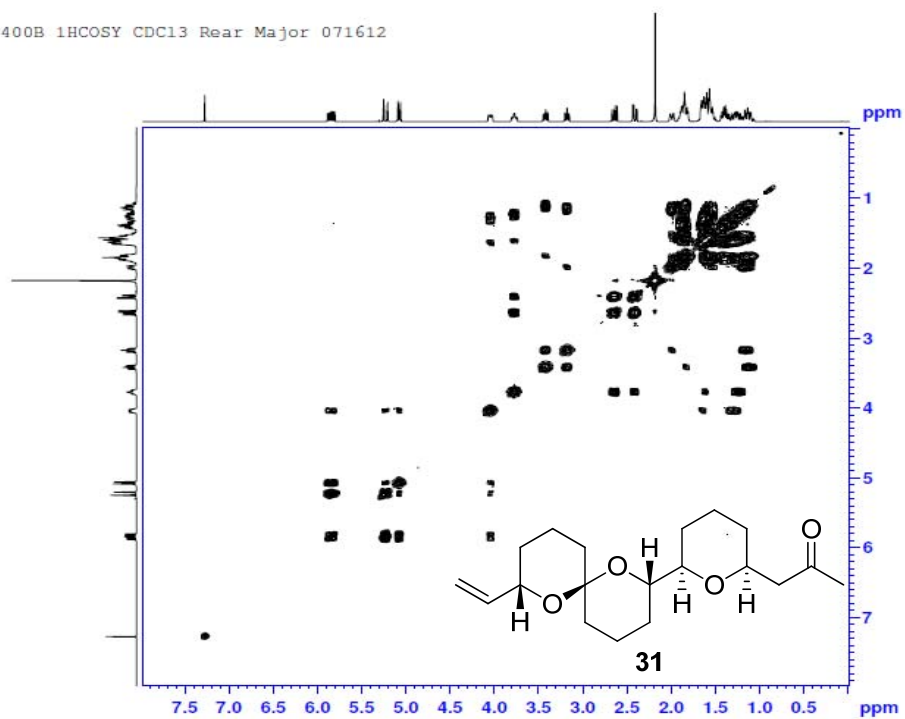

400B 1HNOESY CDC13 Rear Major 071612

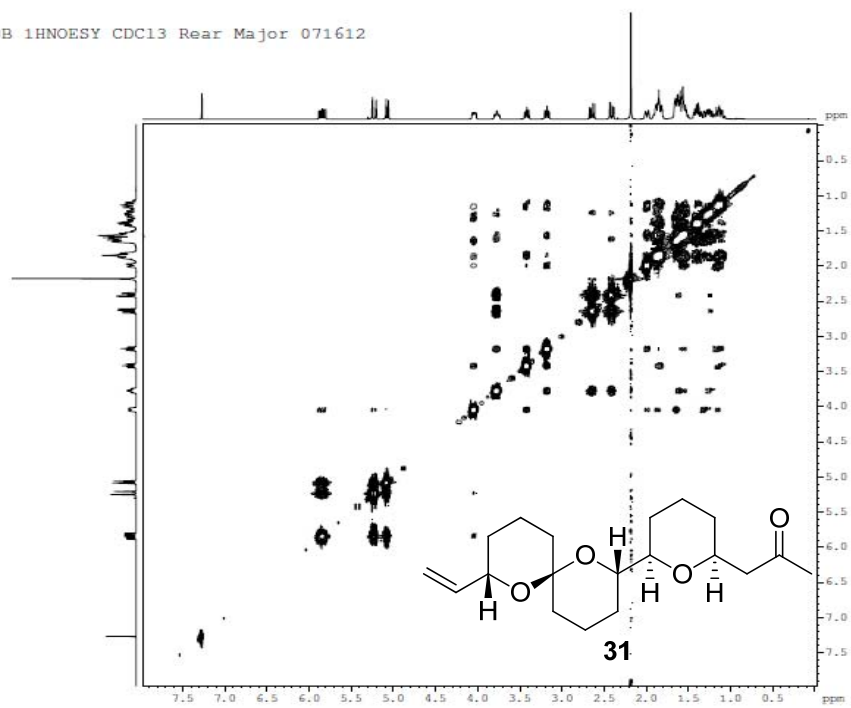

Supplement: NIHMS502254-supplement-Supporting_Information.pdf [file NIHMS502254-supplement-Supporting_Information.pdf]
